# Supplementary material for: Multicomponent synthesis of stereogenic-at-boron fluorophores (BOSPYR) from boronic acids, salicylaldehydes, and 2-formylpyrrole hydrazones
Source: Royal Society of Chemistry journal article supplement (doi:10.1039/d4cc03956d), 2024-12-05
Supplement: d4cc03956d1.pdf [file d4cc03956d1.pdf]

## Supporting Information

for

### Multicomponent Synthesis of Stereogenic-at-Boron Fluorophores (BOSPYR) from Boronic Acids, Salicylaldehydes, and 2-Formylpyrrole Hydrazones

Ezgi Bayer Kömüşdoğan,<sup>a</sup> Sania Batool,<sup>a</sup> Ertan Şahin,<sup>b</sup> Erol Yildirim,<sup>a</sup> Murat Işık<sup>\*c</sup> and Cihangir Tanyeli<sup>\*a</sup>

<sup>a</sup>Department of Chemistry, Middle East Technical University, 06800 Ankara, Türkiye. E-mail: [tanyeli@metu.edu.tr](mailto:tanyeli@metu.edu.tr)

<sup>b</sup>Department of Chemistry, Atatürk University, Erzurum, 25240, Türkiye

<sup>c</sup>Department of Food Engineering, Bingöl University, Bingöl, 12000, Türkiye. E-mail: [misik@bingol.edu.tr](mailto:misik@bingol.edu.tr)

#### Table of Contents

|                                                                                           |            |
|-------------------------------------------------------------------------------------------|------------|
| <b>General</b> .....                                                                      | <b>2S</b>  |
| <b>Acknowledgement</b> .....                                                              | <b>2S</b>  |
| <b>1. Procedure for Synthesis of 2-formylpyrrole hydrazones (4a-d)</b> .....              | <b>3S</b>  |
| <b>2. Procedure for Synthesis of 5-(diethylamino)-2-(1-hydrazonoethyl)phenol 2b</b> ..... | <b>3S</b>  |
| <b>3. Procedure for Synthesis of BOSPYR Dyes through MCR Approach</b> .....               | <b>4S</b>  |
| <b>3.1 BOSPYR 1a</b> .....                                                                | <b>7S</b>  |
| <b>3.2 BOSPYR 1b</b> .....                                                                | <b>13S</b> |
| <b>3.3 BOSPYR 1c</b> .....                                                                | <b>15S</b> |
| <b>3.4 BOSPYR 1d</b> .....                                                                | <b>18S</b> |
| <b>3.5 BOSPYR 1e</b> .....                                                                | <b>20S</b> |
| <b>3.6 BOSPYR 1f</b> .....                                                                | <b>23S</b> |
| <b>3.7 BOSPYR 1g</b> .....                                                                | <b>25S</b> |
| <b>3.8 BOSPYR 1h</b> .....                                                                | <b>28S</b> |
| <b>4. Optical Characterization of the Dyes 1a-h</b> .....                                 | <b>30S</b> |
| <b>4.1 Optical characterization of 1a</b> .....                                           | <b>31S</b> |
| <b>5. Thermal, Configurational, (Photo)chemical Stability of 1a</b> .....                 | <b>32S</b> |
| <b>5.1 Thermal stability test;</b> .....                                                  | <b>32S</b> |
| <b>5.2 Configurational stability test; chiral HPLC reports</b> .....                      | <b>33S</b> |
| <b>5.3 Chemical stability test</b> .....                                                  | <b>36S</b> |
| <b>5.4 Chemical stability of 1e</b> .....                                                 | <b>37S</b> |
| <b>5.5 Photostability test</b> .....                                                      | <b>38S</b> |
| <b>6. Electrochemical Properties</b> .....                                                | <b>39S</b> |
| <b>7. Computational Studies</b> .....                                                     | <b>40S</b> |
| <b>8. X-ray Diffraction Data</b> .....                                                    | <b>46S</b> |

|                                                                |     |
|----------------------------------------------------------------|-----|
| 9. Optimized coordinates for the ground state geometries ..... | 48S |
| References .....                                               | 55S |

## General

1D NMR spectra were recorded on a Bruker Spectrospin Avance DPX 400 spectrometer using  $\text{CDCl}_3$ ,  $d_6$ -DMSO, and  $d_6$ -Acetone as the solvent. 2D and  $^{11}\text{B}$  NMR spectra recorded on Bruker AVANCE III 400 MHz NMR spectrometer. Chemical shift values are reported in ppm from tetramethylsilane as an internal standard. Spin multiplicities are reported as the following: s (singlet), d (doublet), dd (doublet of doublet), m (multiplet). HRMS data were acquired on an Agilent Technologies 6530 Accurate-Mass Q-TOF LC/MS. HPLC analyses were conducted on the Agilent HPLC system using Daicel Chiralpak OD-H, IA columns at room temperatures. Different n-Hexane/Isopropanol systems were used as mobile phases for the analyses. Chiral HPLC analytical resolutions were done using the same Agilent HPLC system. UV-Vis absorption spectra were taken on a Shimadzu UV-2450 UV-VIS spectrophotometer. Fluorescence measurements were recorded on a Perkin-Elmer (Model LS 55) spectrofluorometer. A 1.0 cm path length quartz cell was used for all absorption and emission spectra recordings. The fluorescence lifetime measurements were performed using a LaserStrobe Model TM-3 lifetime fluorophotometer from Photon Technology International (PTI). Polarimetry measurements were recorded on a Rudoph Scientific Autopole III polarimeter. Electrochemical measurements were performed by using a Gamry PCI4 potentiostat-galvanostat at room temperature. Electronic Circular Dichroism spectra were acquired on a JASCO J-1500 CD Spectrometer. X-ray data were collected on a four-circle Rigaku R-AXIS RAPID-S Diffractometer. Flash grade silica gel (SiliaFlash Irregular Silica Gels, F60, 40–63  $\mu\text{m}$ , 60 Å) was used for flash column chromatography (FCC) purifications. Reactions were monitored by thin layer chromatography (TLC) using precoated silica gel plates (Merck Silica Gel PF-254), visualized by a handheld UV-Vis lamp.

## Acknowledgement

We are grateful to Prof. Ahmet Önal and Elif Demir Arabacı (Middle East Technical University) for DPV analysis and helpful scientific discussions. We would like to thank Prof. Akın Akdağ and Aslınur Gökpınar (Middle East Technical University) for their assistance with quantum yield calculation and CD measurement. We are also grateful to Prof. Yavuz Onganer and Dr. Murat Acar (Atatürk University) for fluorescence lifetime measurements and to Prof. Cavit Kazaz and Prof. Yasin Çetinkaya (Atatürk University) for NMR ( $^{11}\text{B}$ ,  $^{13}\text{C}$ ,  $^1\text{H}$ ) measurements. We also thank Assistant Professor Selbi Keskin (Giresun University) for  $^{11}\text{B}$  NMR and 2D NMR measurements. Finally, the authors extend their gratitude to all members of the Tanyeli Group, in particular Dr. Esra DüNDAR, Zeynep Selçuk, and İtir Sezen.

## 1. Procedure for Synthesis of 2-formylpyrrole hydrazones (4a-d)

The compound 2-formylpyrrole hydrazones (**4a-d**) was synthesized by adapting a literature procedure.<sup>i</sup> Before use, absolute ethanol was treated with Argon for 15 minutes. In a container, 310  $\mu$ L hydrazine (80%) (8 eq.) was slowly added to 1 mL absolute ethanol. Then, the 2-formylpyrroles (1mmol, 1 eq.) dissolved in sufficient ethanol (2 ml) was added dropwise to the first solution. The reaction mixture was stirred for 4 hours at room temperature. If sufficient conversion was achieved after TLC control, the solvent was removed under reduced pressure, and compounds (**4a-d**) were obtained as a yellow solid in quantitative yield.

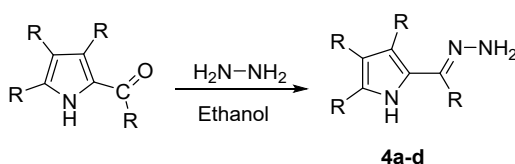

Scheme S 1. Synthesis of compound **4a-d**

## 2. Procedure for Synthesis of 5-(diethylamino)-2-(1-hydrazonoethyl)phenol **2b**

Compound **2b** was prepared by adapting a protocol from the literature.<sup>ii</sup>

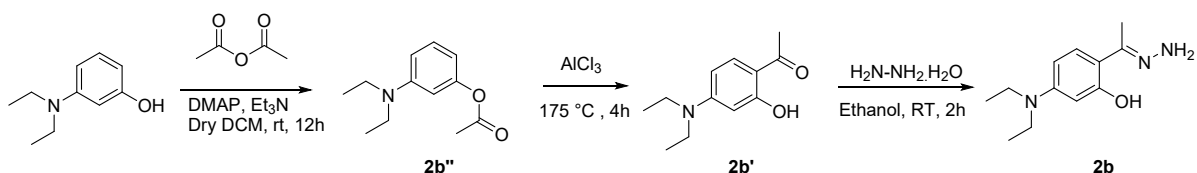

Scheme S 2. Synthesis of compound **2b** and its precursors **2b'** and **2b''**

3-(diethylamino)phenol (0.85 g; 5.16 mmol) was dissolved in 10 mL of dry dichloromethane in a flame-dried round-bottom flask. The reaction mixture was stirred at room temperature for 12 hours after adding acetic anhydride (0.780 mL; 8.25 mmol), DMAP (0.032 g; 0.26 mmol), and triethylamine (0.86 mL; 6.19 mmol). The reaction was then treated with dichloromethane (100 mL), washed with a saturated  $\text{NaHCO}_3$  (2x30 mL) solution and brine (2x30 mL), and dried with anhydrous  $\text{MgSO}_4$ . After filtration, dichloromethane was eliminated under reduced pressure, and column chromatography with silica gel (hexane/ethyl acetate = 90/10) was used to purify the crude product. Compound **2b''** was isolated as a yellow oil with a 68% yield.

Aluminum trichloride (1.384 g; 10.38 mmol) and **2b''** (696 mg; 3.46 mmol) were combined in a round-bottom flask and heated to 175  $^{\circ}\text{C}$  for 4 hours. (It liquefies as it warms up and does not burn, therefore, there is no need for a solvent in the reaction.)  $\text{AlCl}_3$  is a very fine powder; avoid breathing. After cooling, 14 mL of a 1 M cold HCl

solution was added to the reaction mixture. After one hour of stirring at room temperature, 50 milliliters of ethyl acetate were added to the mixture. Then, the organic phase was separated, and 2 × 25 mL of ethyl acetate was used to extract the aqueous phase. The mixed organic phase was dried over Na<sub>2</sub>SO<sub>4</sub>. The volatiles were eliminated under reduced pressure after filtration. The crude was purified using silica gel column chromatography (hexane/ethyl acetate = 95/5). Compound **2b'** was synthesized as an orange oil with a 37% yield.

A solution of **2b'** (268 mg; 1.29 mmol) in 5 mL of ethanol was added dropwise to a solution of hydrazine hydrate (1.62 mL; 41.28 mmol) that had been dissolved in 5 mL of ethanol. At room temperature, the reaction mixture was stirred for six hours. After TLC control, the volatiles were evaporated. Compound **2b** was synthesized in nearly quantitative yield as a brown solid.

### 3. Procedure for Synthesis of BOSPYR Dyes through MCR Approach.

Among the MCR protocols, Procedure B led to competitive aldazine formation<sup>1</sup> when the hydrazone of 4-(diethylamino)salicylaldehyde was employed for the synthesis of model compound **1a**. Gratifyingly, switching to the hydrazone of pyrrole-2-carbaldehydes (**4a–d**) suppressed azine formation and improved overall yields in Procedure A. To further enhance product yields, we also explored linear synthetic approaches, but these attempts were unsuccessful (*vide infra*).

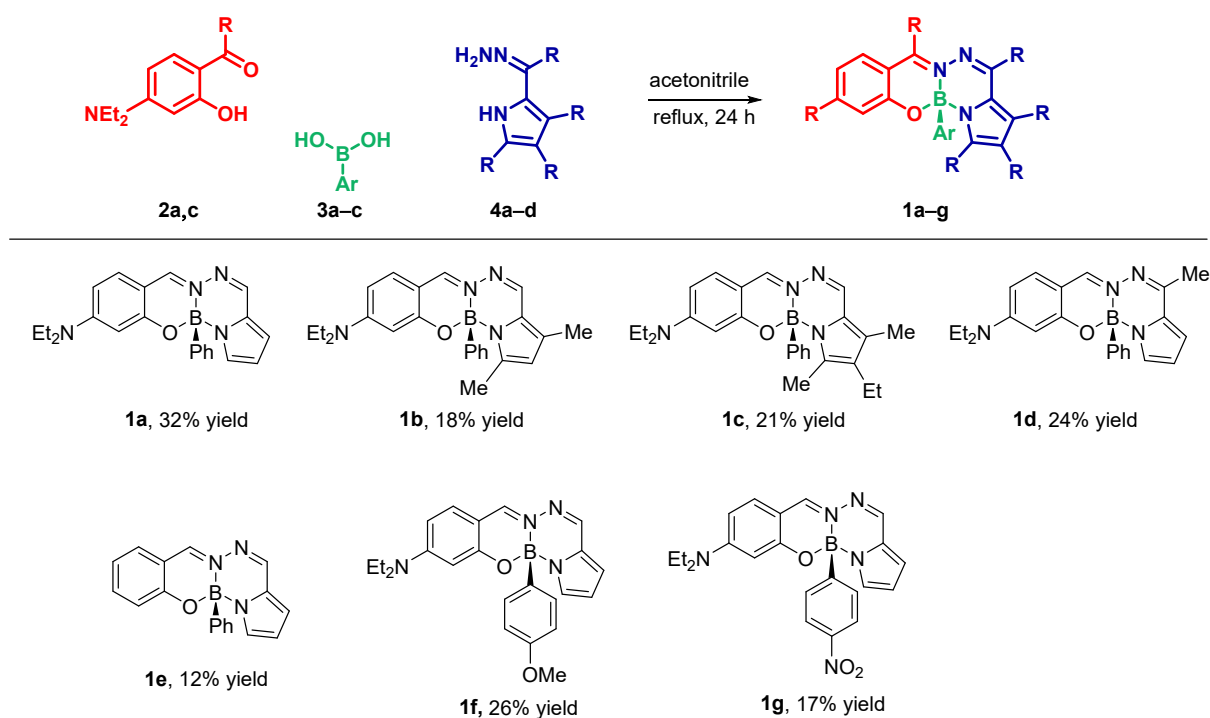

Scheme S 3. Synthesis of BOSPYR dyes with Procedure A

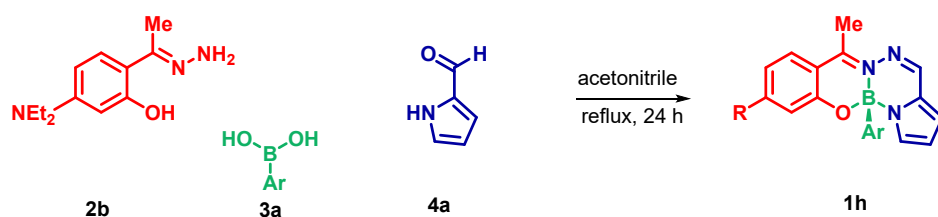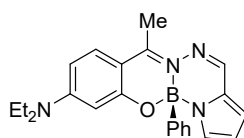

1h, 16% yield

#### Scheme S 4. Synthesis of BOSPYPYR dyes with Procedure B

**Procedure A.** After mixing salicylaldehyde derivatives (**2a–d**) (0.5 mmol, 1 equiv.), arylboronic acids (**3a–c**) (0.5 mmol, 1 equiv.), and formylpyrrole hydrazones (**3a–d**) (0.5 mmol, 1 equiv.) in a round-bottom flask, 8 mL of degassed acetonitrile was introduced. The resulting mixture underwent refluxing for a duration of 24 hours. Subsequently, purification was accomplished via column chromatography, utilizing a solvent system consisting of hexane/ethyl acetate (5:1).

**Procedure B.** After mixing 1H-pyrrole-2-carbaldehyde **4a** (0.37 mmol, 1 equiv.), arylboronic acids **3a** (0.37 mmol, 1 equiv.), and compound **2b** (0.37 mmol, 1 equiv.) in a round-bottom flask, 6 mL of degassed acetonitrile was introduced. The resulting mixture underwent refluxing for a duration of 24 hours. Subsequently, purification was accomplished via column chromatography with hexane as solvent.

#### Unsuccessful efforts toward synthesis of 1a:

Alternatively, we explored three distinct synthetic pathways to access compound **1a**. These linear approaches involved the condensation of hydrazones with aldehydes to generate imines (Rxn 2 & 3) or the direct condensation of two aldehydes and hydrazine (Rxn 1) followed by complexation with arylboronic acid. Despite optimization efforts, none of these pathways yielded trace of the desired product. For condensation reactions, we have used solvents acetonitrile and toluene. Consequently, the multicomponent reaction described in Procedures A and B emerged as the most efficient route for the synthesis of **1a**. The corresponding TLC profiles are provided below.

Rxn 1

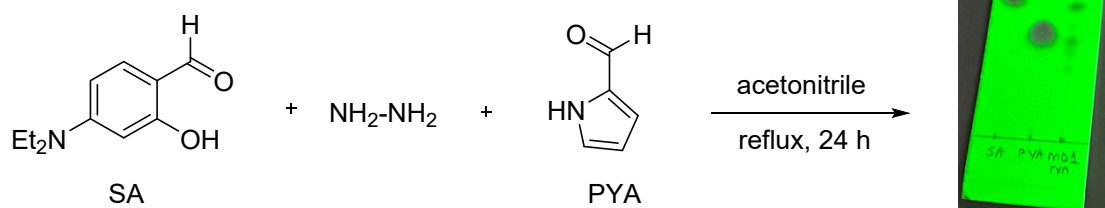

Rxn 2

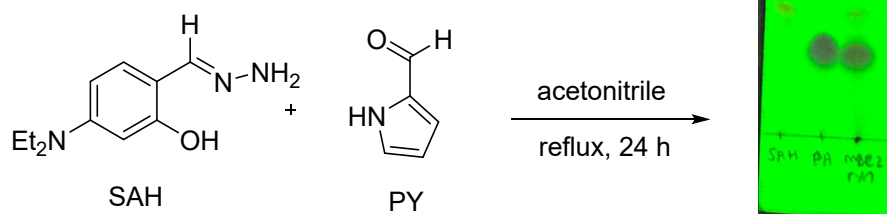

Rxn 3

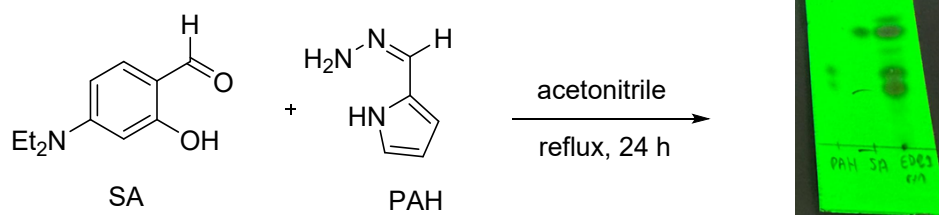

Scheme S 5. Optimization studies

### 3.1 BOSPYR 1a

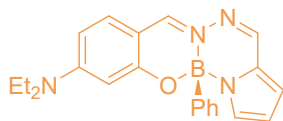

Compound **1a** was isolated as an orange solid in 32% yield (59.2 mg). **<sup>1</sup>H NMR** (400 MHz, Chloroform-*d*) δ 8.12 (s, 1H), 7.75 (s, 1H), 7.30 (s, 1H), 7.21 – 7.07 (m, 6H), 6.65 (d, *J* = 3.6 Hz, 1H), 6.34 (t, *J* = 3.0 Hz, 1H), 6.30 – 6.23 (m, 2H), 3.43 (qd, *J* = 7.0, 4.4 Hz, 4H), 1.24 (t, *J* = 7.0 Hz, 6H). **<sup>13</sup>C NMR** (100 MHz, Chloroform-*d*) δ 161.4, 156.0, 153.6, 146.2, 134.1, 130.6, 127.8, 127.5, 127.2, 125.6, 115.3, 112.3, 106.7, 106.1, 98.7, 45.1, 12.9 ppm. **<sup>11</sup>B NMR** (128 MHz, Chloroform-*d*) δ 3.02 (bs). **HRMS** (APCI+) calculated for C<sub>22</sub>H<sub>24</sub>BN<sub>4</sub>O <sup>10</sup>B [M+H]<sup>+</sup>, 370.2079; found, 370.2074. **HPLC analysis** (OD-H, n-Hexane/Isopropanol, 98:2, 1 mL/min, 474 nm) *t*<sub>1</sub> = 12.87 min and *t*<sub>2</sub> = 16.49 min. **mp** = 175 °C.  $[\alpha]_D^{25} = -2054.79$  (c 3.65 x 10<sup>-5</sup>, CHCl<sub>3</sub>) for fast-eluting enantiomer,  $[\alpha]_D^{25} = +2082.19$  (c 3.65 x 10<sup>-5</sup>, CHCl<sub>3</sub>) for slow-eluting enantiomer.

SK-M9(CDCL3).2.1.1r  
SK-M9(CDCL3)-PROTON

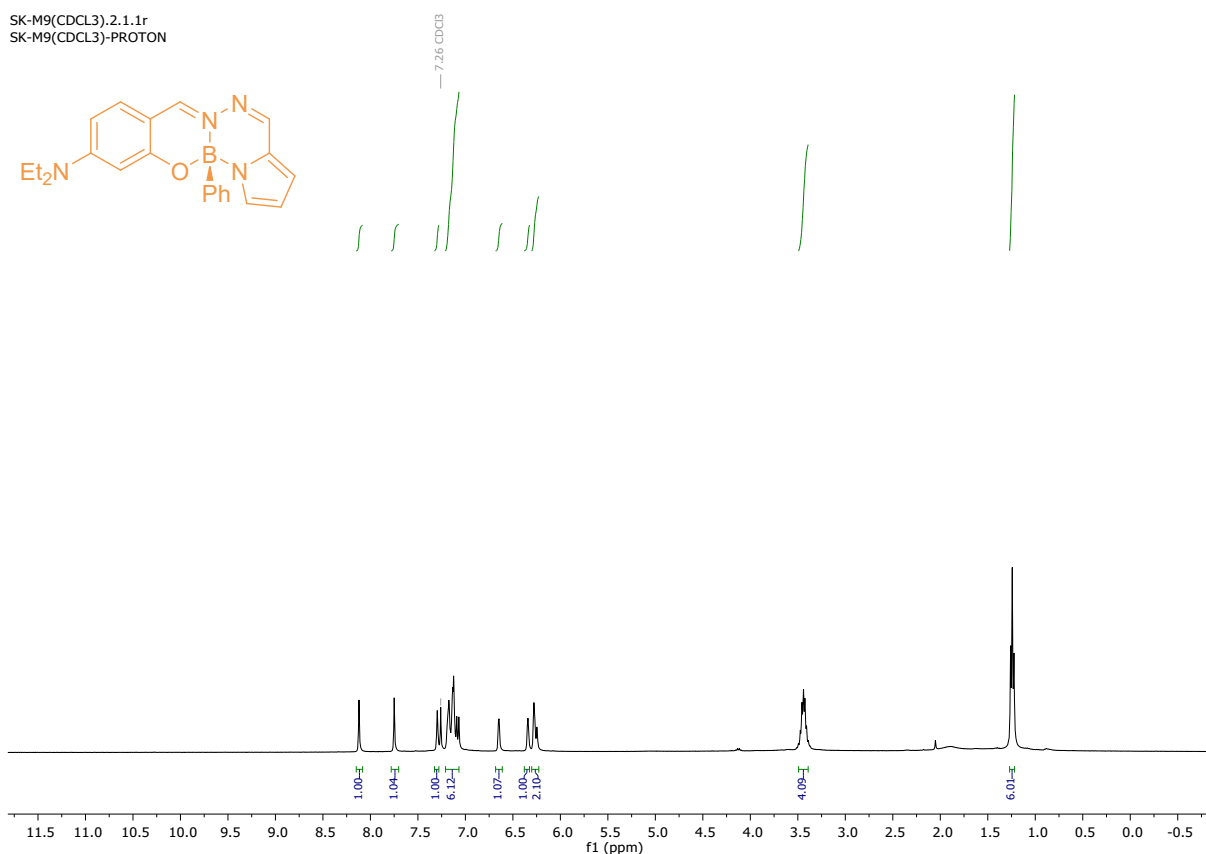

Figure S 1. <sup>1</sup>H NMR spectrum of **1a**

SK-M9(CDCL3).3.1.1r  
SK-M9(CDCL3)-C13

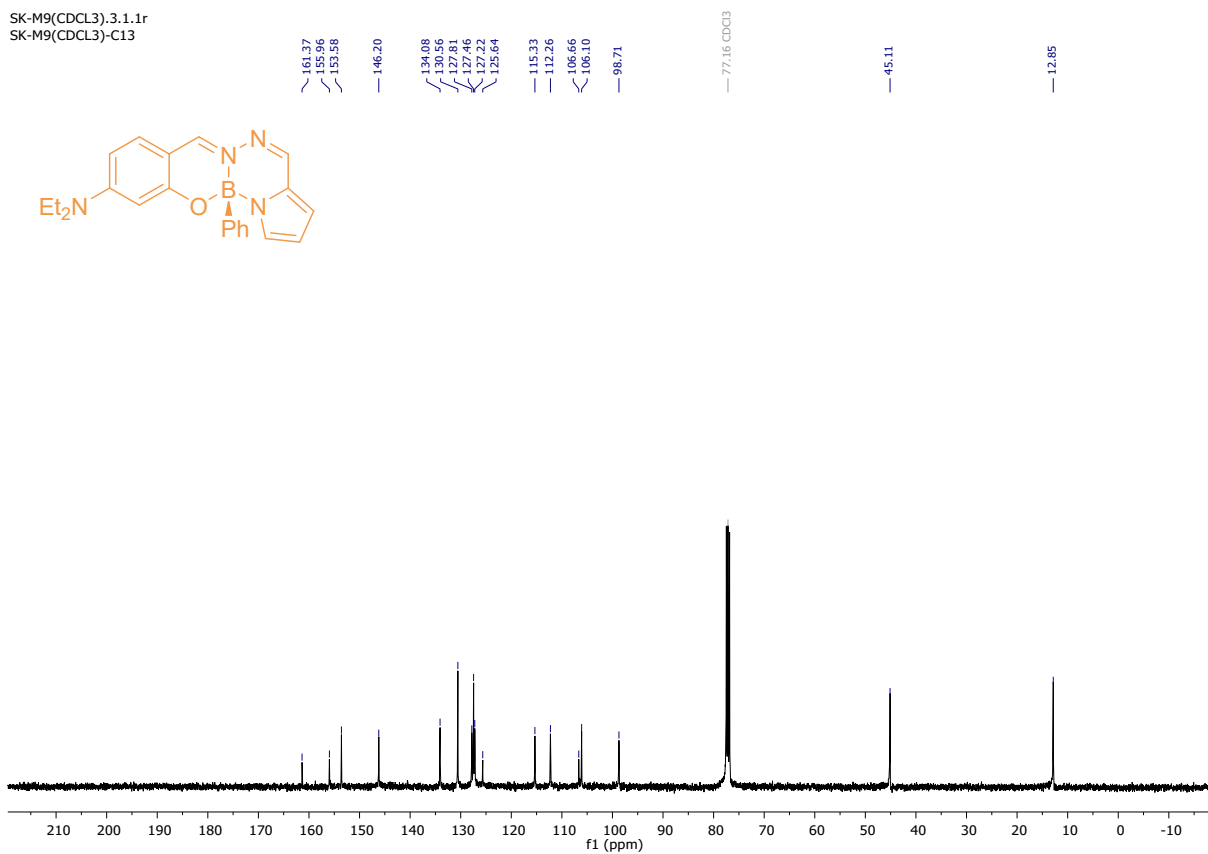

Figure S 2. <sup>13</sup>C NMR spectrum of **1a**

SK-M9(CDCL3).999.1.1r

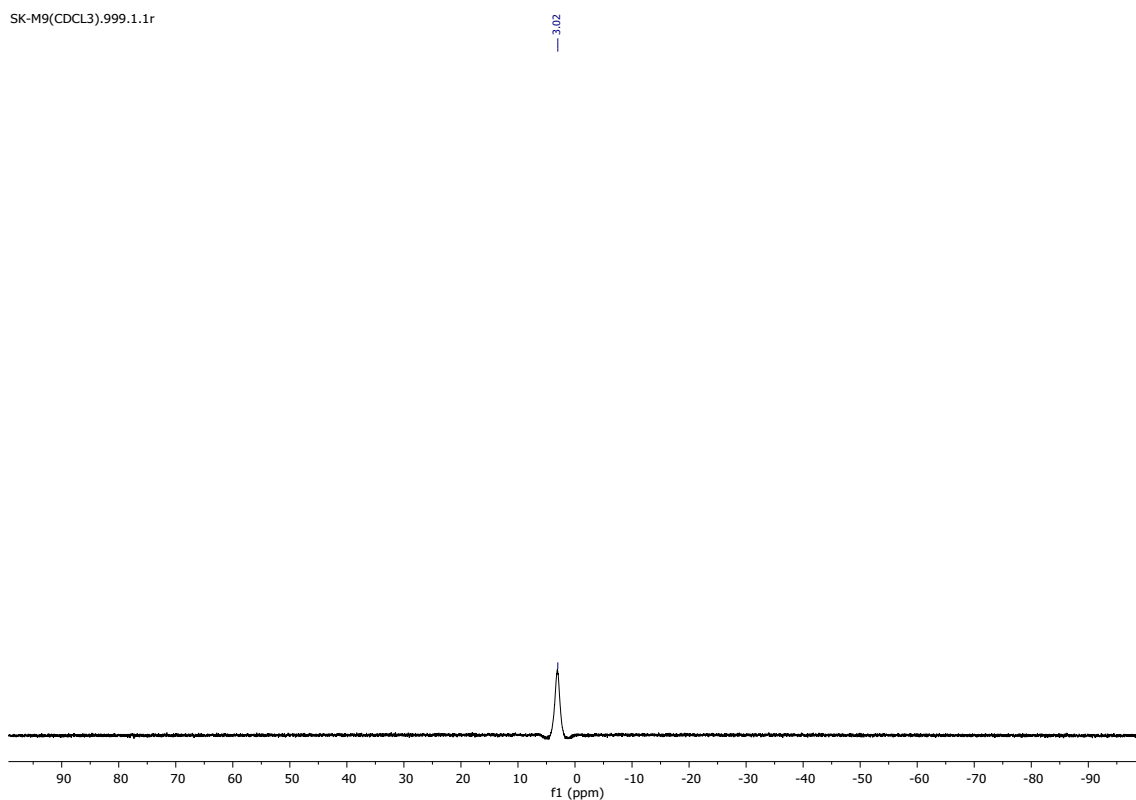

Figure S 3. <sup>11</sup>B NMR spectrum (128 MHz) of **1a** in CDCl<sub>3</sub>



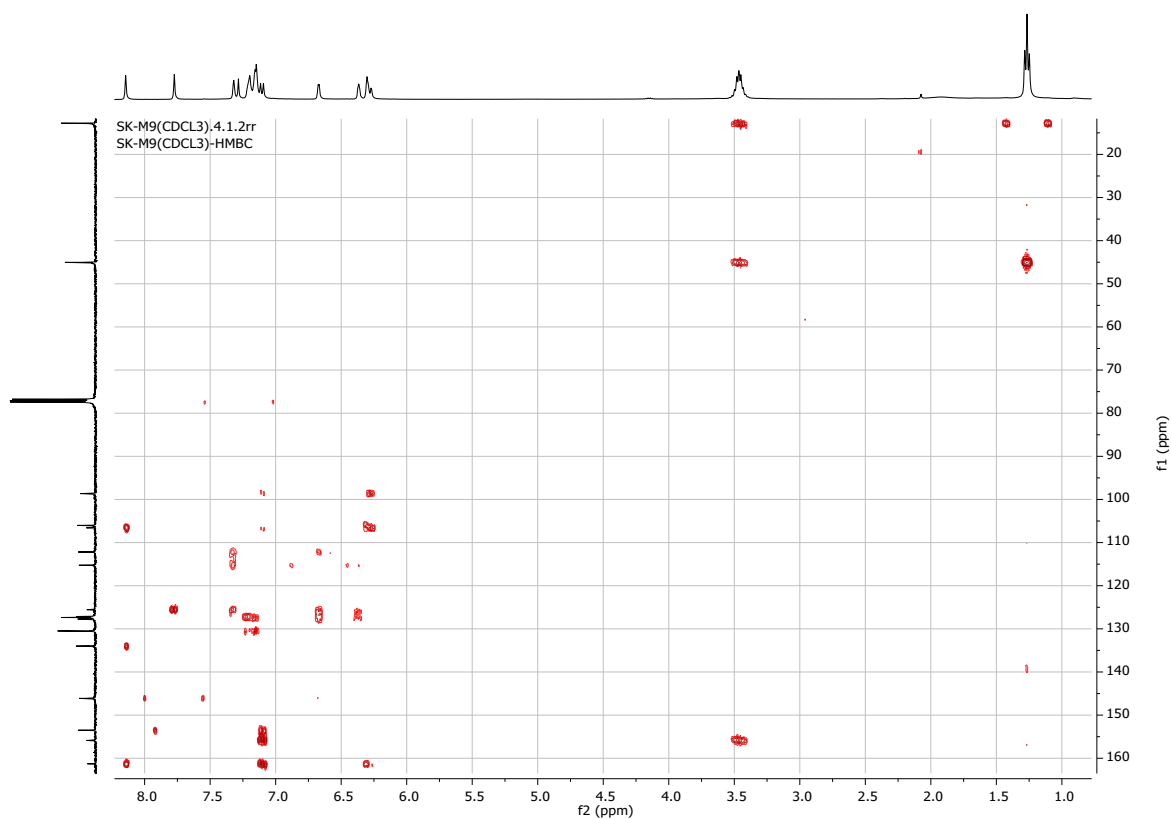

Figure S 4. HMBC NMR spectrum (400 MHz) of **1a** in CDCl<sub>3</sub>.

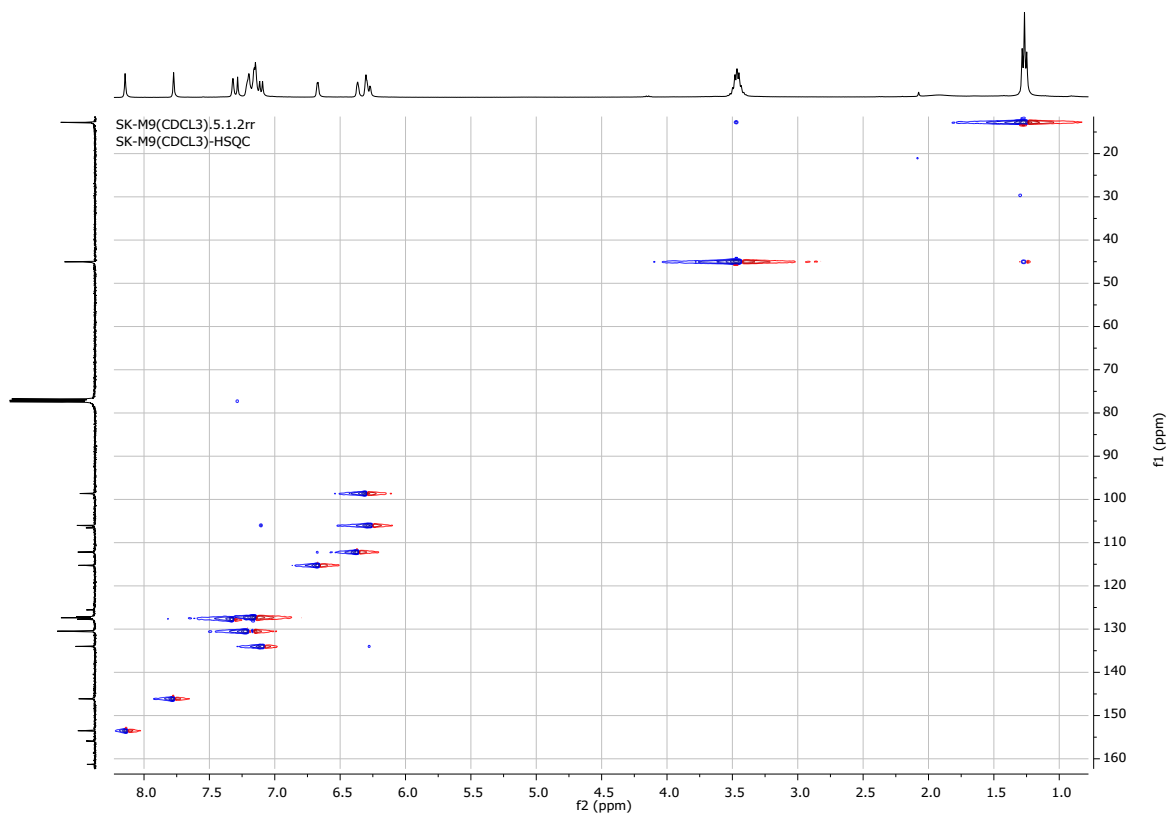

Figure S 5. HSQC NMR spectrum (400 MHz) of **1a** in CDCl<sub>3</sub>.

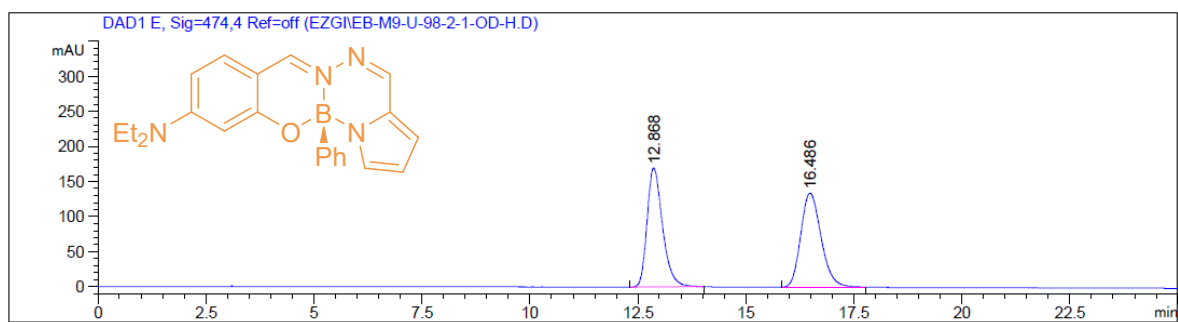

Signal 5: DAD1 E, Sig=474,4 Ref=off

| Peak # | RetTime [min] | Type | Width [min] | Area [mAU*s] | Height [mAU] | Area %  |
|--------|---------------|------|-------------|--------------|--------------|---------|
| 1      | 12.868        | BB   | 0.3721      | 4210.91553   | 169.34698    | 49.0553 |
| 2      | 16.486        | BB   | 0.4670      | 4373.09668   | 133.89679    | 50.9447 |

Totals : 8584.01221 303.24377

Figure S 6. HPLC chromatogram of **1a**

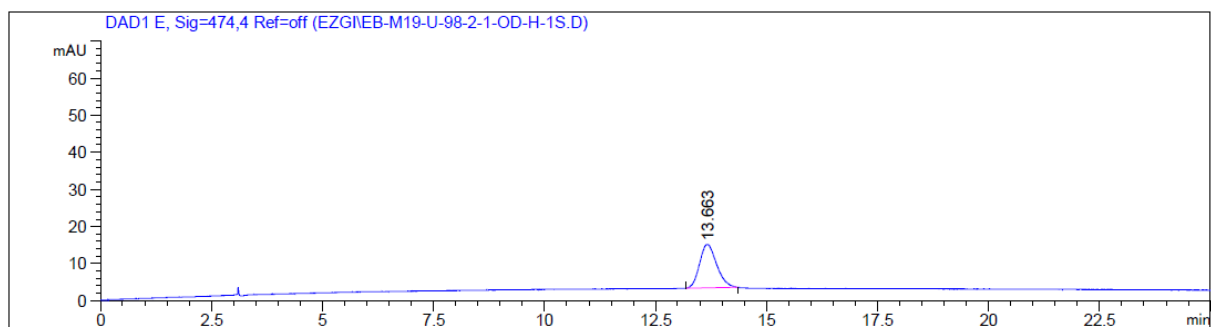

Signal 5: DAD1 E, Sig=474,4 Ref=off

| Peak # | RetTime [min] | Type | Width [min] | Area [mAU*s] | Height [mAU] | Area %   |
|--------|---------------|------|-------------|--------------|--------------|----------|
| 1      | 13.663        | BB   | 0.3151      | 313.11560    | 11.70368     | 100.0000 |

Totals : 313.11560 11.70368

Figure S 7. HPLC chromatogram of (-)-**1a**

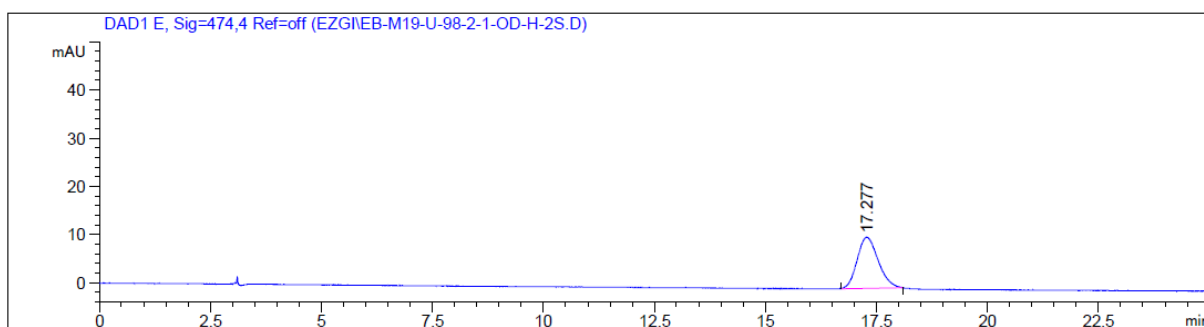

Signal 5: DAD1 E, Sig=474,4 Ref=off

| Peak # | RetTime [min] | Type | Width [min] | Area [mAU*s] | Height [mAU] | Area %   |
|--------|---------------|------|-------------|--------------|--------------|----------|
| 1      | 17.277        | BB   | 0.3863      | 348.62738    | 10.61120     | 100.0000 |

Totals :                                    348.62738    10.61120

Figure S 8. HPLC chromatogram of (+)-**1a**

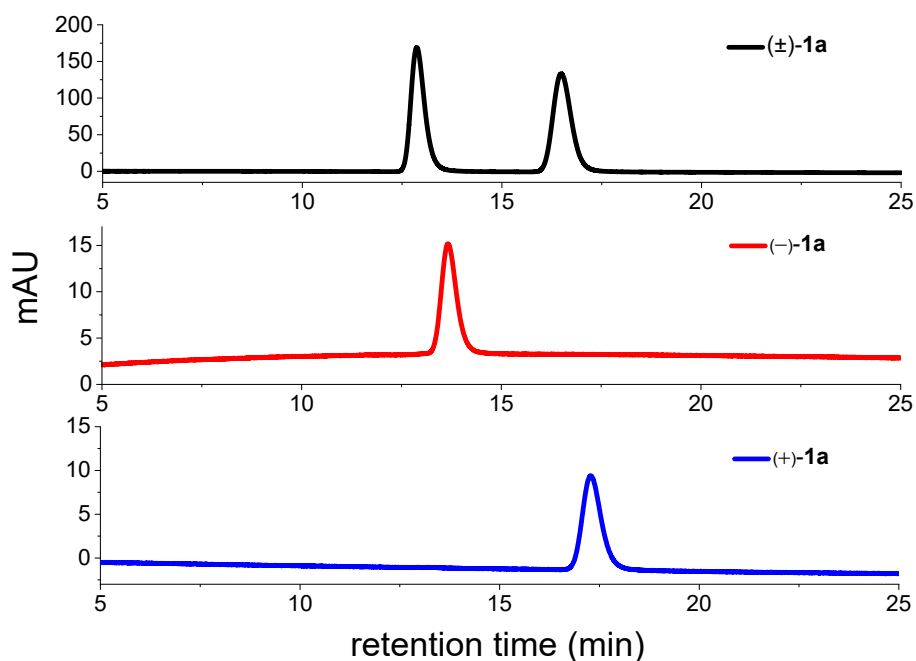

Figure S 9. Chiral HPLC separation of racemic **1a** on a Chiralcel® OD-H column. (top) Racemic mixture (±)-**1a**. (middle) Resolved fast-eluting enantiomer, (-)-**1a** (>99.9% ee). (bottom) Resolved slow-eluting enantiomer, (+)-**1a** (>99.9% ee).

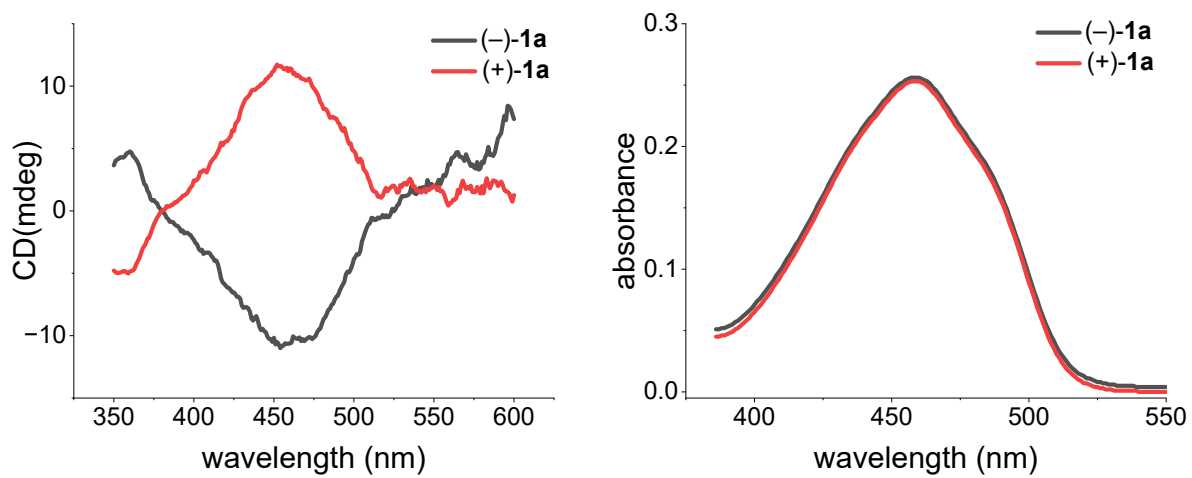

Figure S 10. Electronic circular dichroism (left) and UV-vis absorption (right) spectra of enantiomers of **1a** (each 10  $\mu$ M) in toluene.

### 3.2 BOSPYR 1b

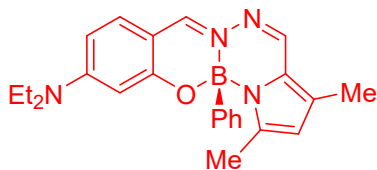

Compound **1b** was isolated as an orange solid in 18% yield (35.9 mg). **<sup>1</sup>H NMR** (400 MHz, Chloroform-*d*)  $\delta$  8.12 (s, 1H), 7.71 (s, 1H), 7.18 – 7.10 (m, 5H), 7.05 (d,  $J = 9.5$  Hz, 1H), 6.30 – 6.21 (m, 2H), 5.91 (s, 1H), 3.45 (qd,  $J = 7.2, 3.5$  Hz, 4H), 2.37 (s, 3H), 2.26 (s, 3H), 1.25 (t,  $J = 7.1$  Hz, 6H). **<sup>13</sup>C NMR** (100 MHz, Chloroform-*d*)  $\delta$  161.1, 155.6, 152.2, 142.7, 142.0, 133.7, 130.8, 129.1, 127.4, 127.1, 123.0, 114.0, 106.7, 105.9, 98.5, 45.0, 14.5, 12.9, 10.8 ppm. **<sup>11</sup>B NMR** (128 MHz, Chloroform-*d*)  $\delta$  3.25 (bs). **HRMS** (APCI) calculated for C<sub>24</sub>H<sub>28</sub>BN<sub>4</sub>O <sup>10</sup>B [M+H]<sup>+</sup>, 398.2392; found, 398.2387. **HPLC analysis** (OD-H, n-Hexane/Isopropanol, 98:2, 0.7 mL/min, 254 nm)  $t_1 = 13.33$  min and  $t_2 = 19.50$  min.

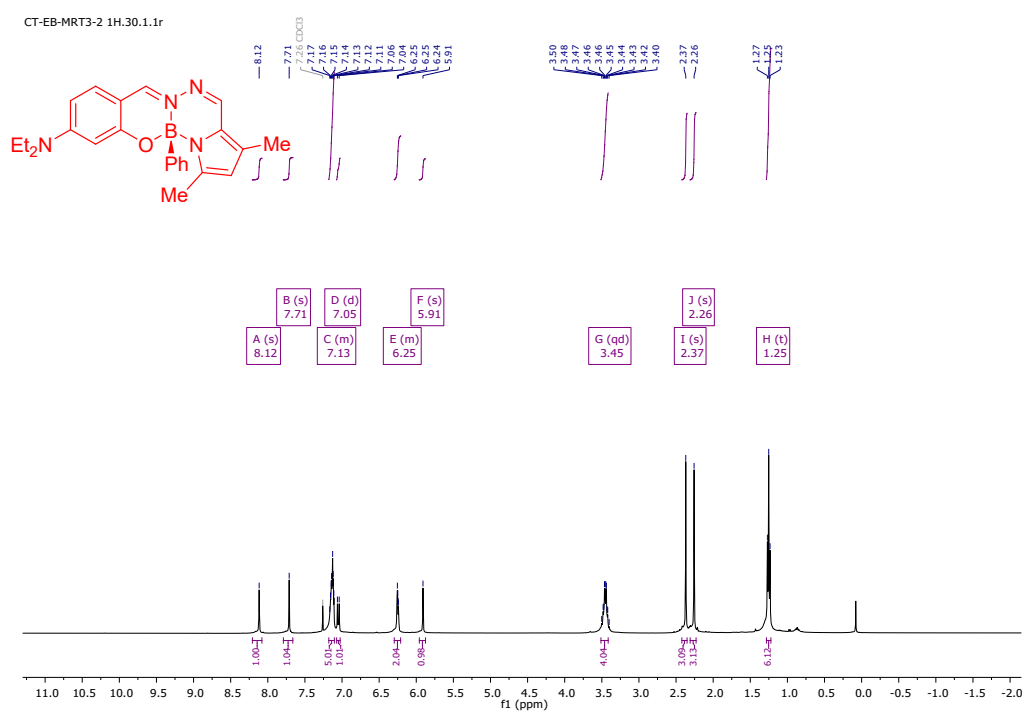

Figure S 11. <sup>1</sup>H NMR spectrum of **1b**

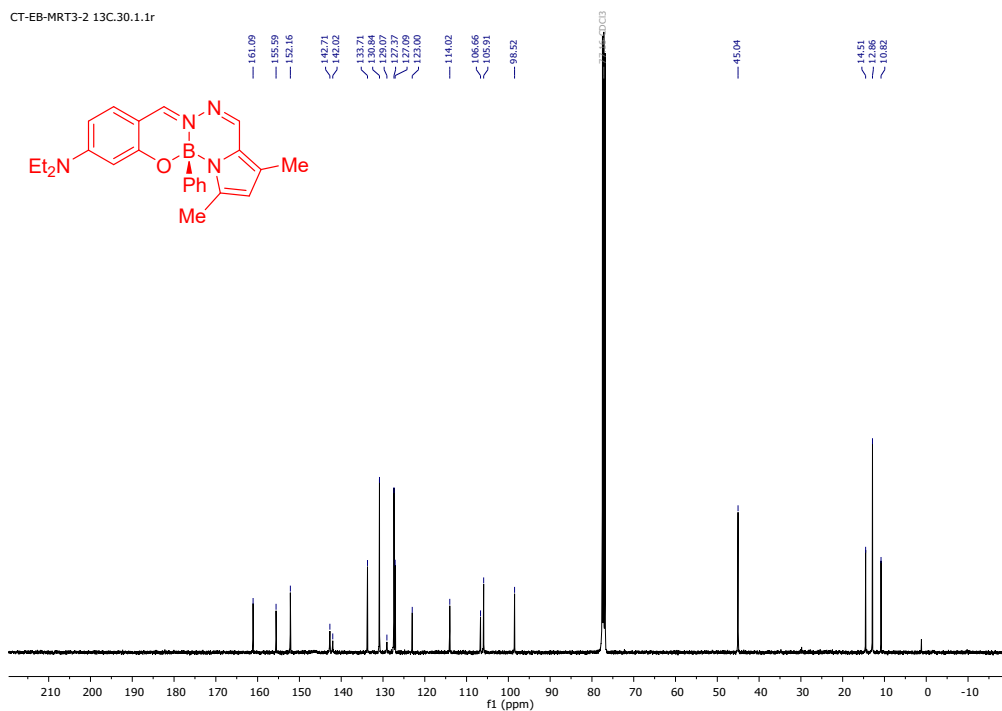

Figure S 12. <sup>13</sup>C NMR spectrum of **1b**

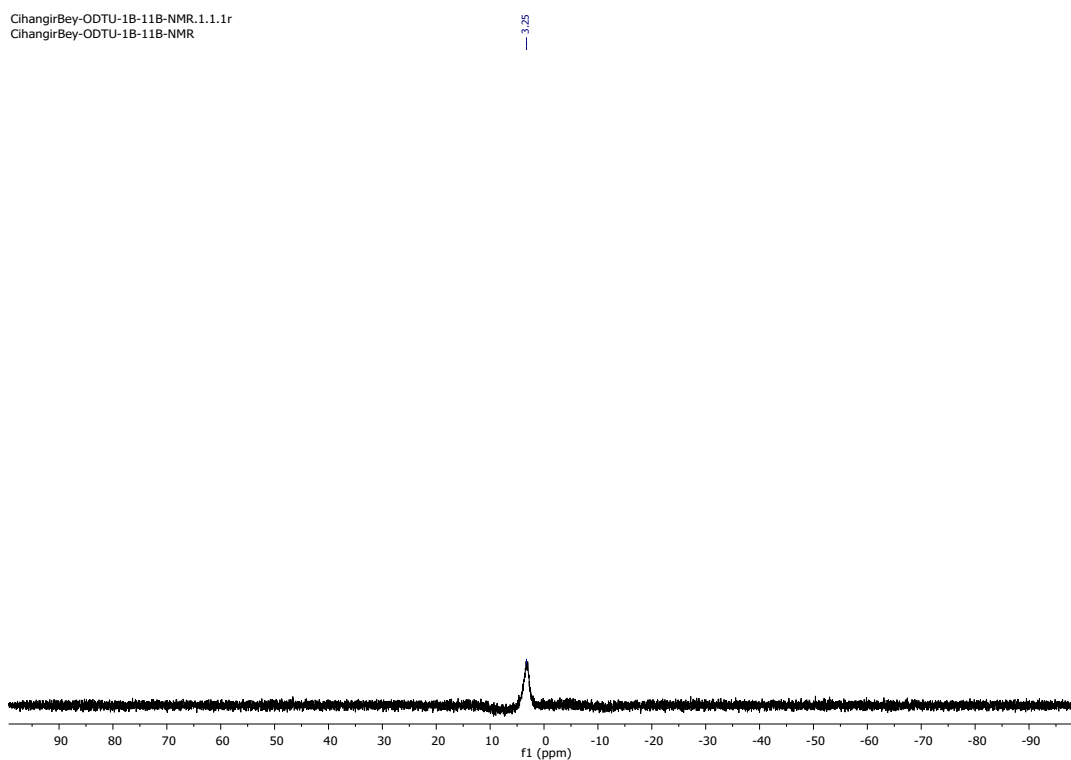

Figure S 13. <sup>11</sup>B NMR spectrum (128 MHz) of **1b** in CDCl<sub>3</sub>

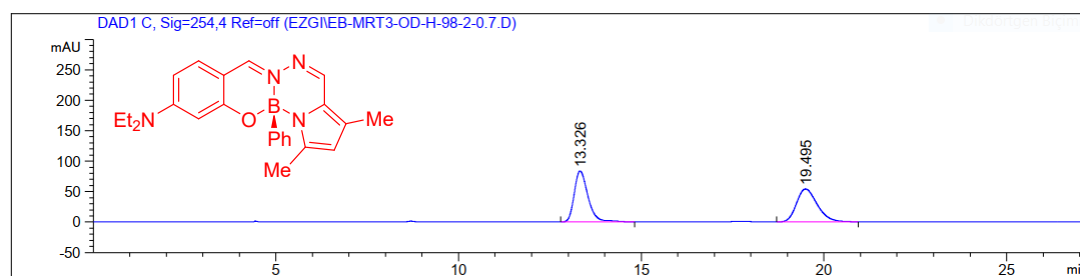

Signal 3: DAD1 C, Sig=254,4 Ref=off

| Peak # | RetTime [min] | Type | Width [min] | Area [mAU*s] | Height [mAU] | Area %  |
|--------|---------------|------|-------------|--------------|--------------|---------|
| 1      | 13.326        | BB   | 0.3870      | 2192.72803   | 83.87321     | 50.6470 |
| 2      | 19.495        | BB   | 0.5206      | 2136.70654   | 54.06291     | 49.3530 |

Totals : 4329.43457 137.93612

Figure S 14. HPLC chromatogram of **1b**

### 3.3 BOSPYR **1c**

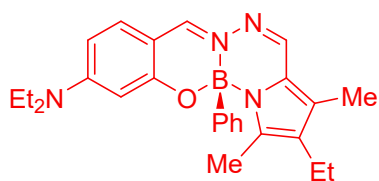

Compound **1c** was isolated as an orange solid in 21% yield (44.8 mg). **<sup>1</sup>H NMR** (400 MHz, Acetone-*d*<sub>6</sub>) δ 8.23 (s, 1H), 7.72 (s, 1H), 7.22 (d, *J* = 8.8 Hz, 1H), 7.15 – 7.07 (m, 2H), 7.02 – 6.96 (m, 3H), 6.36 (dd, *J* = 8.8, 2.5 Hz, 1H), 6.32 (d, *J* = 2.5 Hz, 1H), 3.50 (q, *J* = 7.0 Hz, 4H), 2.31 (q, *J* = 7.5 Hz, 2H), 2.24 (s, 3H), 2.13 (s, 3H), 1.19 (t, *J* = 7.0 Hz, 6H), 0.95 (t, *J* = 7.5 Hz, 3H). **<sup>13</sup>C NMR** (100 MHz, Chloroform-*d*) δ 161.0, 155.3, 152.1, 143.6, 138.1, 133.4, 130.9, 127.3, 126.9, 126.2, 125.7, 121.9, 106.8, 105.6, 98.5, 45.0, 17.5, 15.5, 12.9, 12.2, 9.1 ppm. **<sup>11</sup>B NMR** (128 MHz, Chloroform-*d*) δ 3.37 (bs). **HRMS** (APCI) calculated for C<sub>26</sub>H<sub>32</sub>BN<sub>4</sub>O <sup>10</sup>B [M+H]<sup>+</sup>, 426.2705; found, 426.2700. **HPLC analysis** (OD-H, n-Hexane/Isopropanol, 90:10, 1 mL/min, 500 nm) *t*<sub>1</sub> = 5.91 min and *t*<sub>2</sub> = 7.20 min.

CTEB-M28-1 1H.10.1.1r

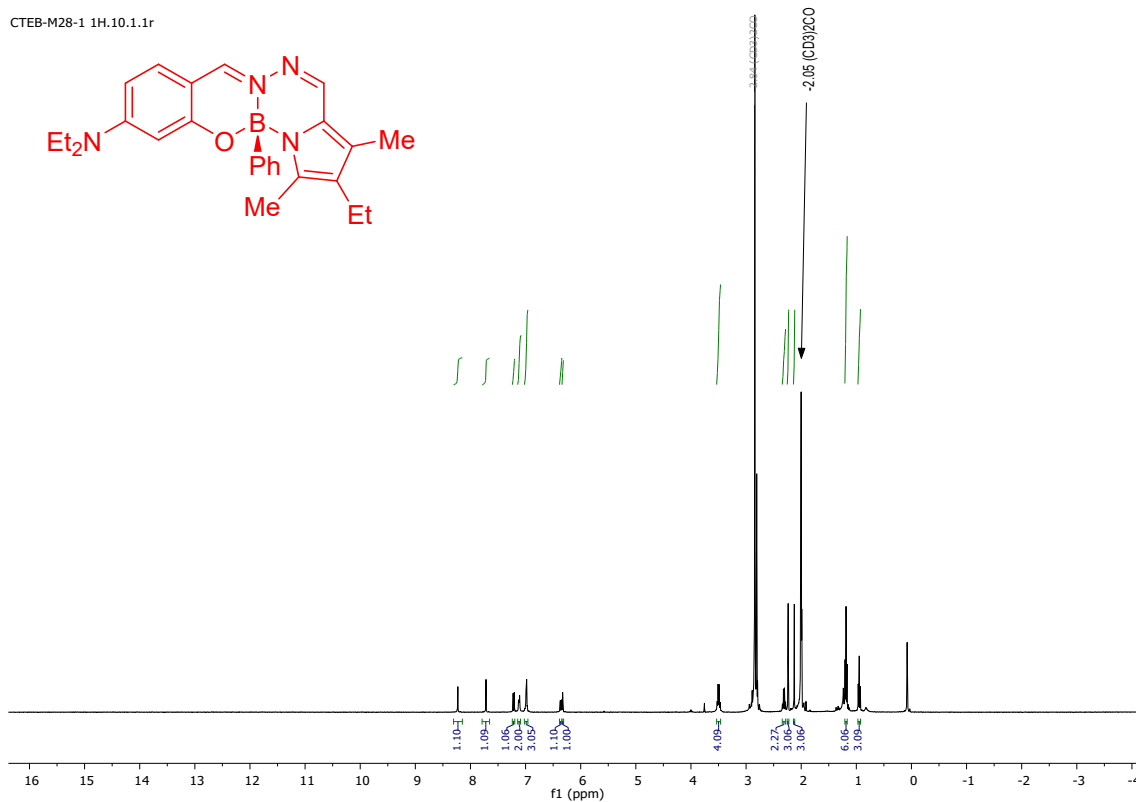

Figure S 15. <sup>1</sup>H NMR spectrum of **1c**

CihangirBey-1C-13cNMR  
13C OBSERVE

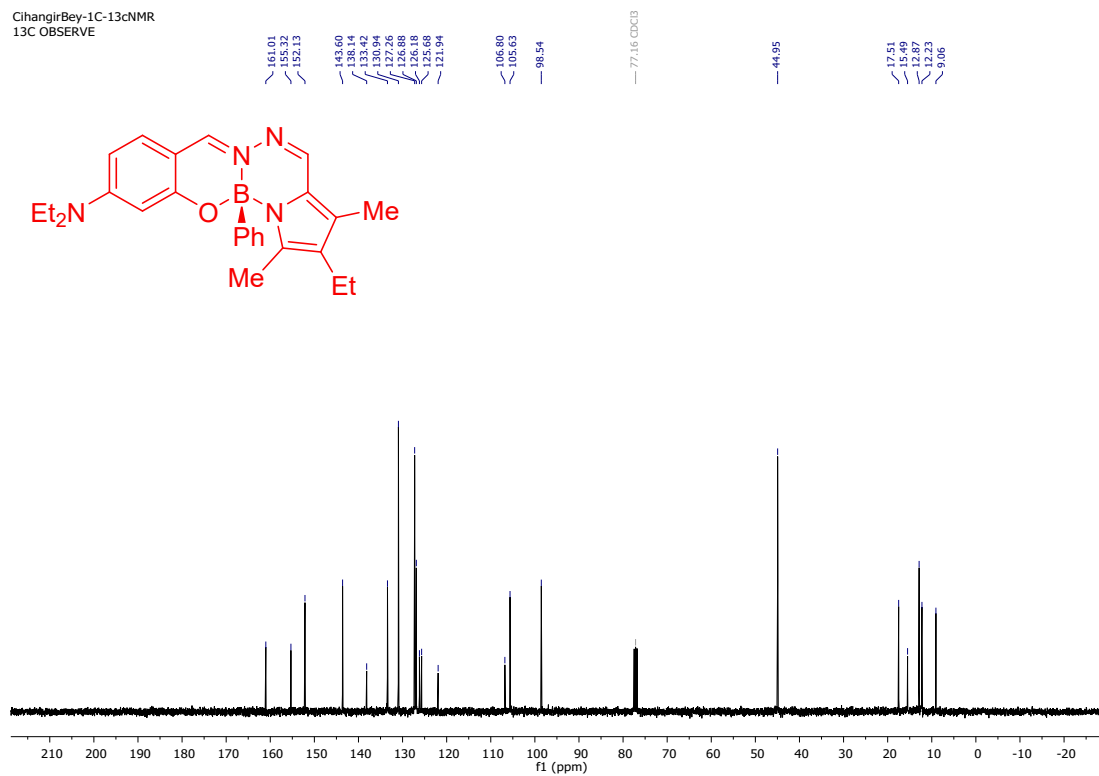

Figure S 16. <sup>13</sup>C NMR spectrum of **1c**



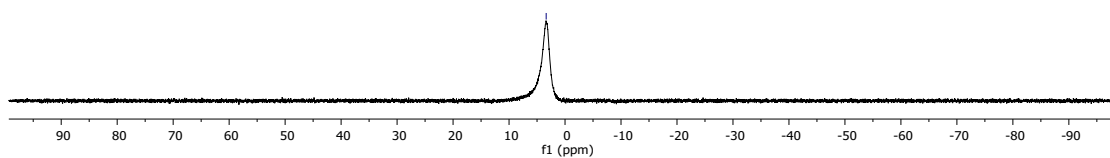

Figure S 17.  $^{11}\text{B}$  NMR spectrum (128 MHz) of **1c** in  $\text{CDCl}_3$

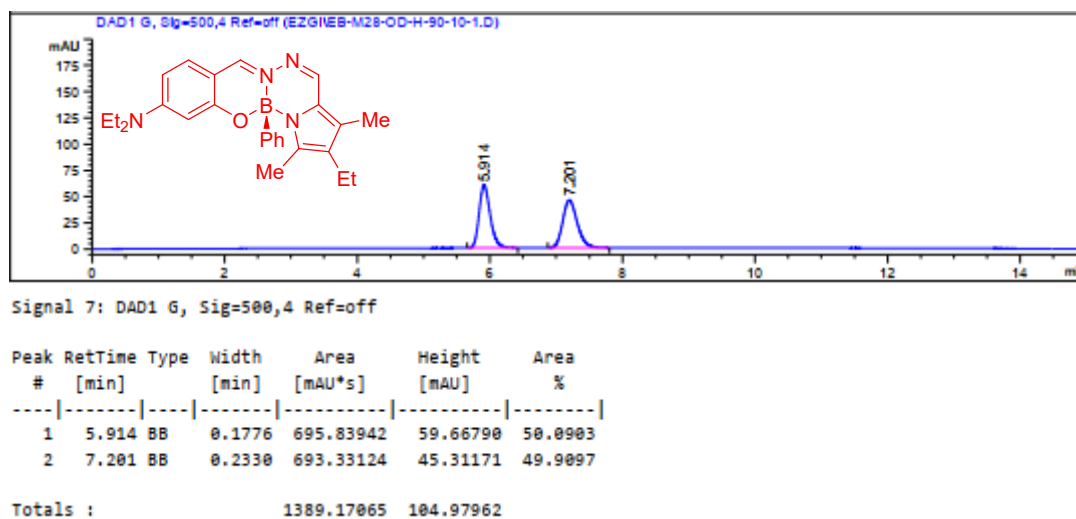

Figure S 18. HPLC chromatogram of **1c**

### 3.4 BOSPYR 1d

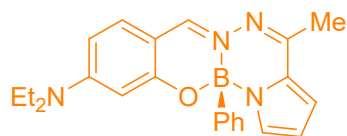

Compound **1d** was isolated as an orange solid in 24% yield (46.1 mg). **<sup>1</sup>H NMR** (400 MHz, Acetone-*d*<sub>6</sub>) δ 8.30 (s, 1H), 7.25 (d, *J* = 9.0 Hz, 1H), 7.16 – 7.14 (m, 1H), 7.12 – 7.07 (m, 2H), 7.03 – 6.96 (m, 3H), 6.61 (dd, *J* = 3.7, 1.2 Hz, 1H), 6.35 (dd, *J* = 9.0, 2.5 Hz, 1H), 6.23 – 6.16 (m, 2H), 3.47 (qd, *J* = 7.2, 2.2 Hz, 4H), 2.27 (s, 3H), 1.16 (t, *J* = 7.2 Hz, 6H). **<sup>13</sup>C NMR** (100 MHz, Acetone-*d*<sub>6</sub>) δ 161.9, 156.7, 154.7, 154.2, 135.0, 131.3, 127.9, 127.5, 126.9, 126.8, 113.9, 111.9, 107.5, 106.8, 98.9, 45.4, 19.4, 12.9 ppm. **<sup>11</sup>B NMR** (128 MHz, Chloroform-*d*) δ 2.83 (bs). **HRMS** (APCI) calculated for C<sub>23</sub>H<sub>26</sub>BN<sub>4</sub>O <sup>10</sup>B [M+H]<sup>+</sup>, 384.2236; found, 384.2231. **HPLC analysis** (OD-H, n-Hexane/Isopropanol, 98:2, 1 mL/min, 474 nm) *t*<sub>1</sub> = 11.65 min and *t*<sub>2</sub> = 13.16 min.

CT-EB-M19 1H.40.1.1r  
CT-EB-M19 1H

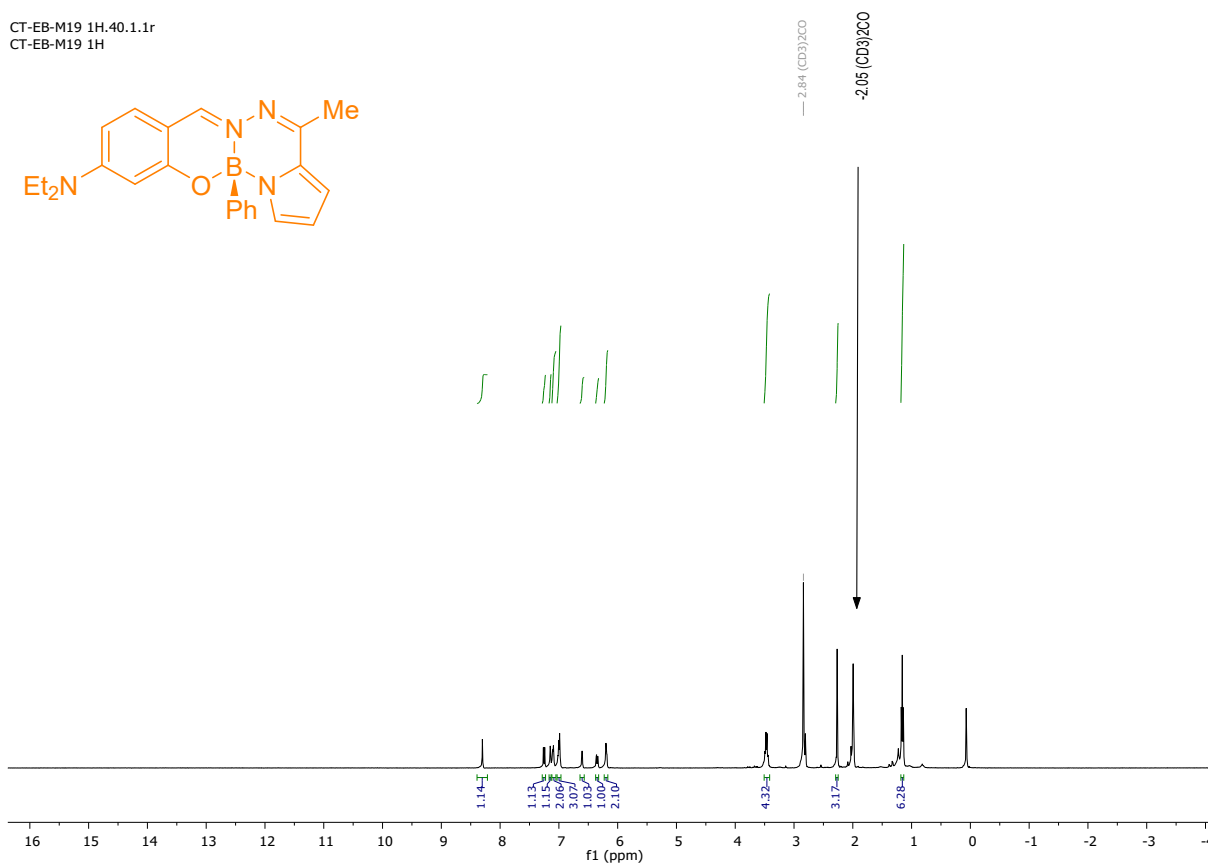

Figure S 19. <sup>1</sup>H NMR spectrum of **1d**

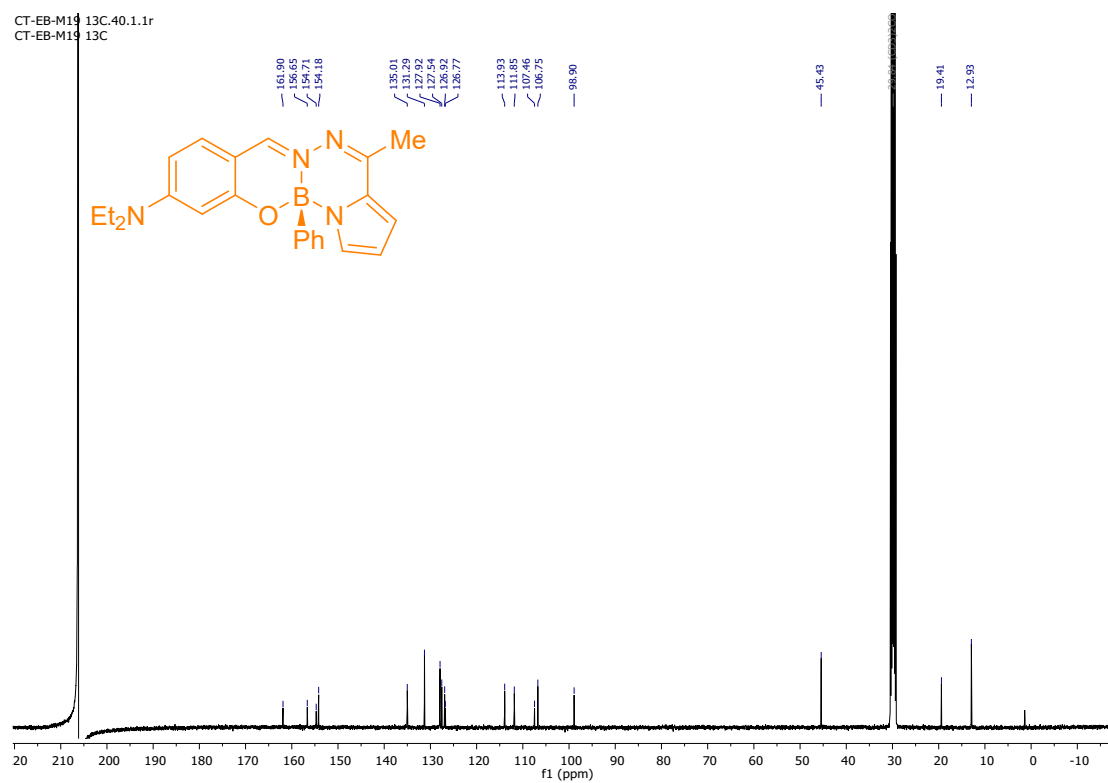

Figure S 20.  $^{13}\text{C}$  NMR spectrum of **1d**

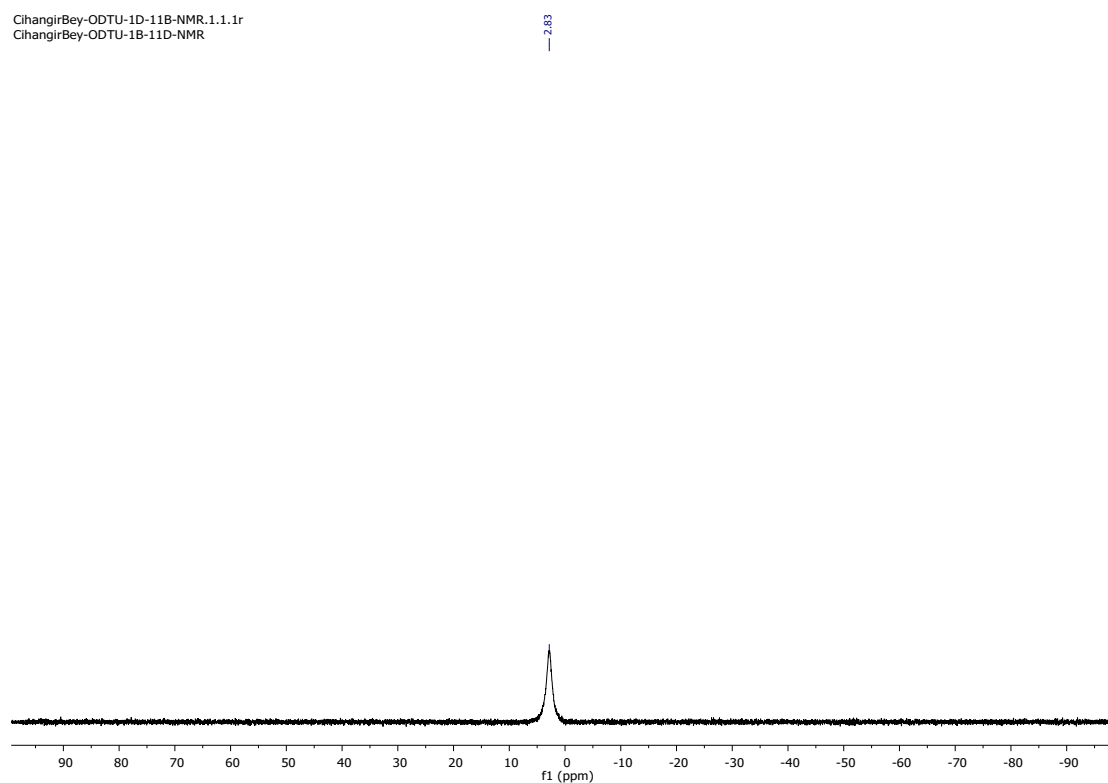

Figure S 21.  $^{11}\text{B}$  NMR spectrum (128 MHz) of **1d** in  $\text{CDCl}_3$

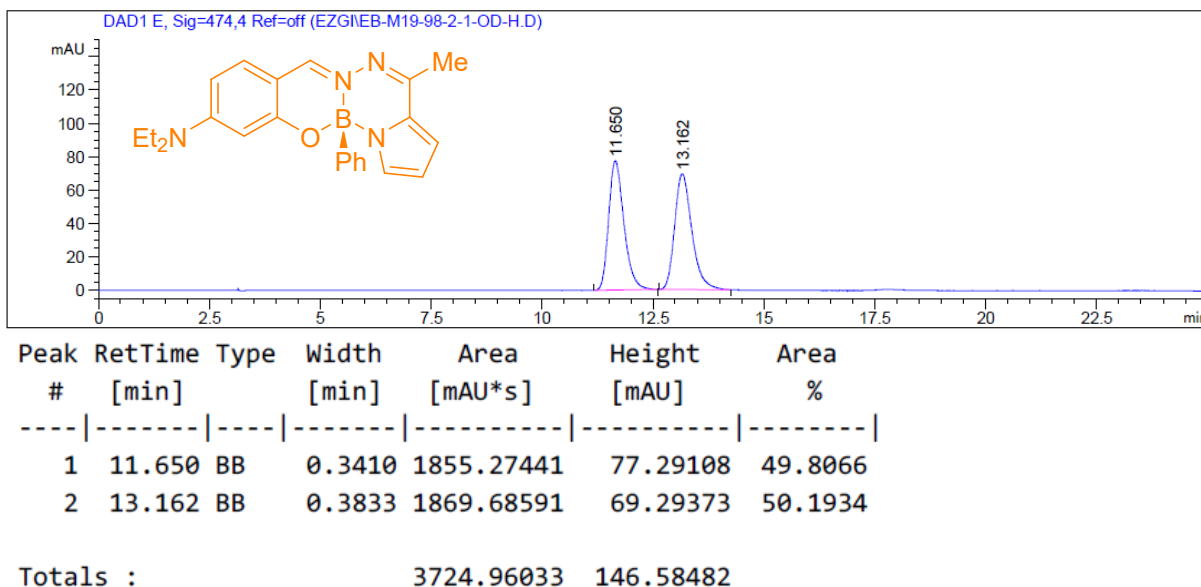

Figure S 22. HPLC chromatogram of **1d**

### 3.5 BOSPYPYR **1e**

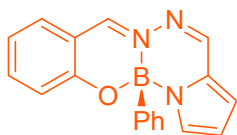

Compound **1e** was isolated as an orange solid in 12% yield (18.0 mg).  $^1\text{H NMR}$  (400 MHz, Acetone- $d_6$ )  $\delta$  8.76 (s, 1H), 7.96 (s, 1H), 7.54 (d,  $J = 7.8$  Hz, 2H), 7.25 (s, 1H), 7.10 – 6.95 (m, 6H), 6.90 (t,  $J = 7.5$  Hz, 1H), 6.68 (d,  $J = 3.6$  Hz, 1H), 6.26 – 6.20 (m, 1H).  $^{13}\text{C NMR}$  (100 MHz, Acetone- $d_6$ )  $\delta$  159.7, 158.2, 150.3, 139.1, 133.8, 131.2, 129.8, 128.2, 128.1, 126.3, 121.2, 119.6, 118.2, 118.1, 113.3 ppm.  $^{11}\text{B NMR}$  (128 MHz, Chloroform- $d$ )  $\delta$  3.96 (bs). **HRMS** (APCI) calculated for  $\text{C}_{18}\text{H}_{15}\text{BN}_3\text{O}$   $^{10}\text{B}$   $[\text{M}+\text{H}]^+$ , 299.1344; found, 229.1339. **HPLC analysis** (IA, n-Hexane/Isopropanol, 90:10, 1 mL/min, 500 nm)  $t_1 = 14.21$  min and  $t_2 = 21.24$  min.

CT-EB-M18 1H  
CT-EB-M18 1H

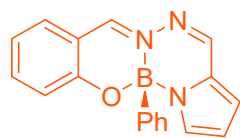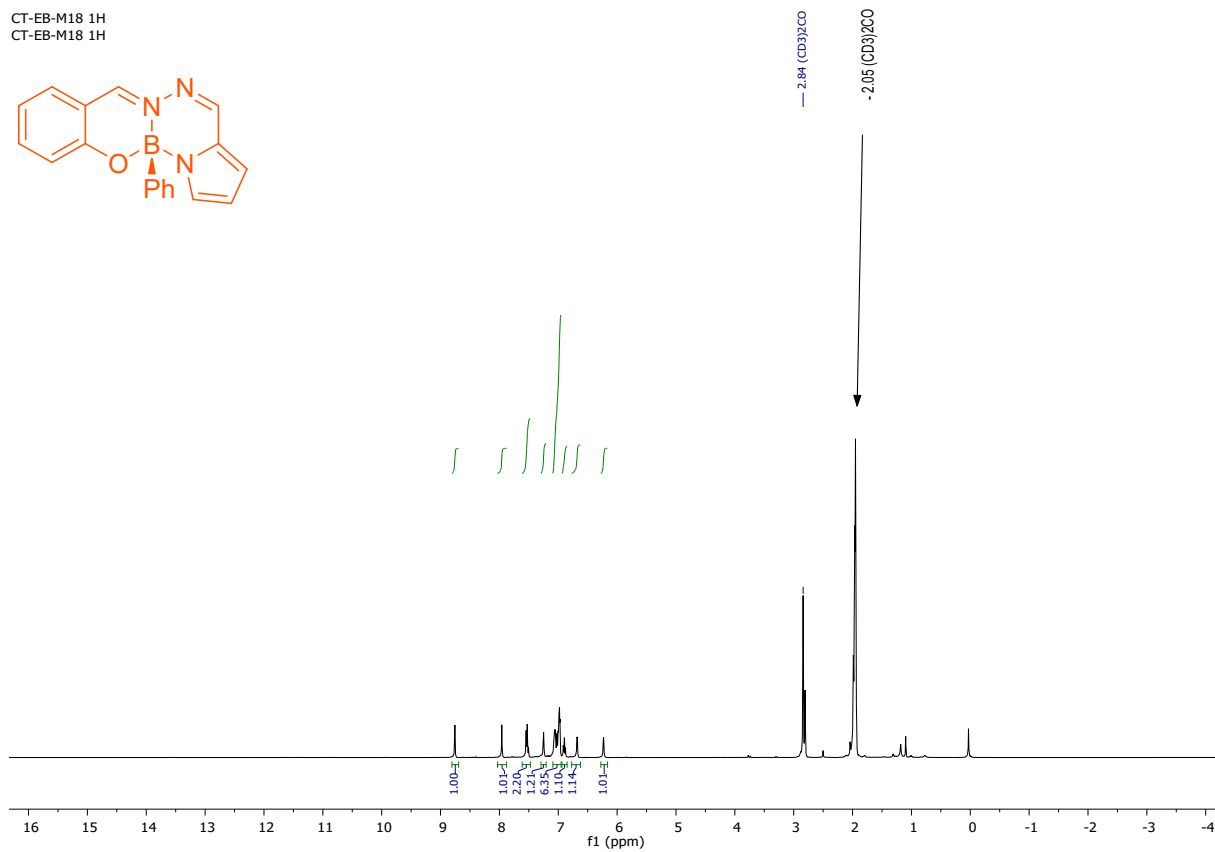

Figure S 23. <sup>1</sup>H NMR spectrum of **1e**

CT-EB-M18 13C  
CT-EB-M18 13C

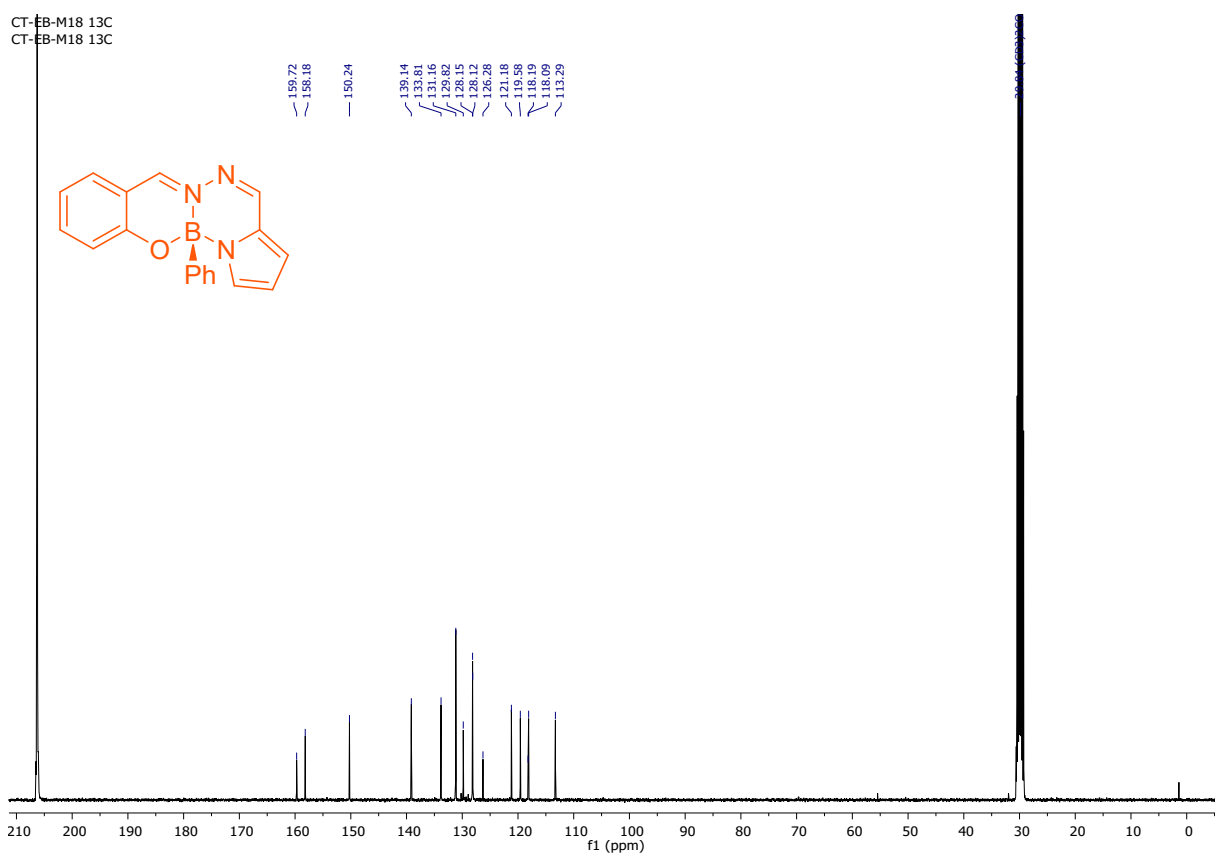

Figure S 24. <sup>13</sup>C NMR spectrum of **1e**

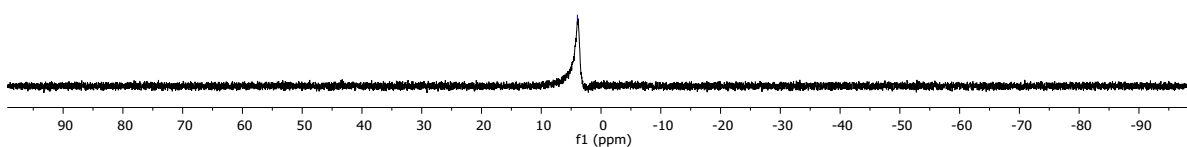

Figure S 25.  $^{11}\text{B}$  NMR spectrum (128 MHz) of **1e** in  $\text{CDCl}_3$

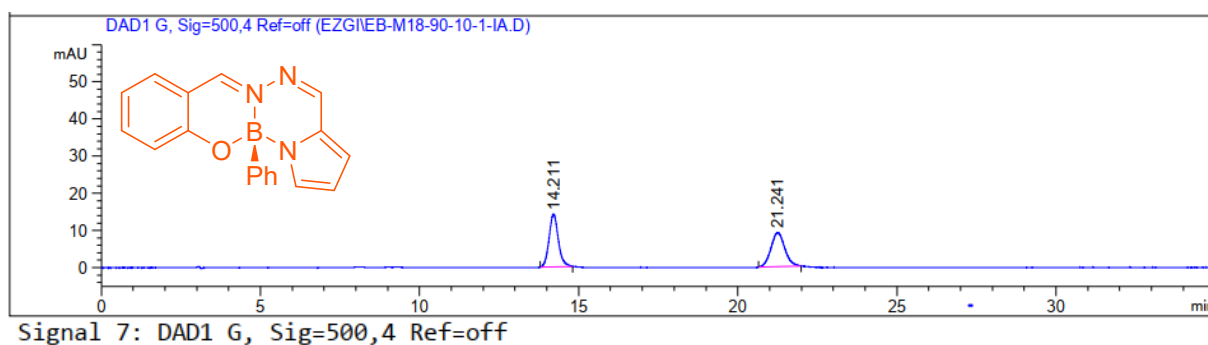

| Peak # | RetTime [min] | Type | Width [min] | Area [mAU*s] | Height [mAU] | Area %  |
|--------|---------------|------|-------------|--------------|--------------|---------|
| 1      | 14.211        | BB   | 0.2449      | 287.75186    | 14.23140     | 51.1131 |
| 2      | 21.241        | BB   | 0.3521      | 275.21890    | 9.17043      | 48.8869 |

Totals : 562.97076 23.40183

Figure S 26. HPLC chromatogram of **1e**

### 3.6 BOSPYR 1f

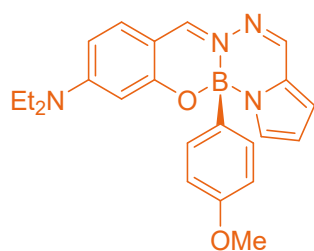

Compound **1f** was isolated as an orange solid in 26% yield (52.0 mg). **<sup>1</sup>H NMR** (400 MHz, Acetone-*d*<sub>6</sub>) δ 8.37 (s, 1H), 7.82 (s, 1H), 7.32 (d, *J* = 9.0 Hz, 1H), 7.20 (s, 1H), 7.06 (d, *J* = 8.0 Hz, 2H), 6.66 – 6.53 (m, 3H), 6.42 (dd, *J* = 9.0, 2.5 Hz, 1H), 6.27 – 6.22 (m, 2H), 3.64 (s, 3H), 3.53 (q, *J* = 6.8, 6.2 Hz, 4H), 1.22 (t, *J* = 7.0 Hz, 6H). **<sup>13</sup>C NMR** (100 MHz, Chloroform-*d*) δ 161.4, 159.0, 155.9, 153.5, 146.2, 134.0, 131.8, 127.7, 125.7, 115.2, 113.0, 112.2, 106.6, 106.0, 98.6, 55.0, 45.1, 12.9 ppm. **<sup>11</sup>B NMR** (128 MHz, Chloroform-*d*) δ 3.24 (bs). **HRMS** (APCI) calculated for C<sub>23</sub>H<sub>26</sub>BN<sub>4</sub>O<sub>2</sub> <sup>10</sup>B [M+H]<sup>+</sup>, 400.2185; found, 400.2180. **HPLC analysis** (OD-H, n-Hexane/Isopropanol, 90:10, 1 mL/min, 500 nm) t<sub>1</sub> = 12.81 min and t<sub>2</sub> = 17.51 min.

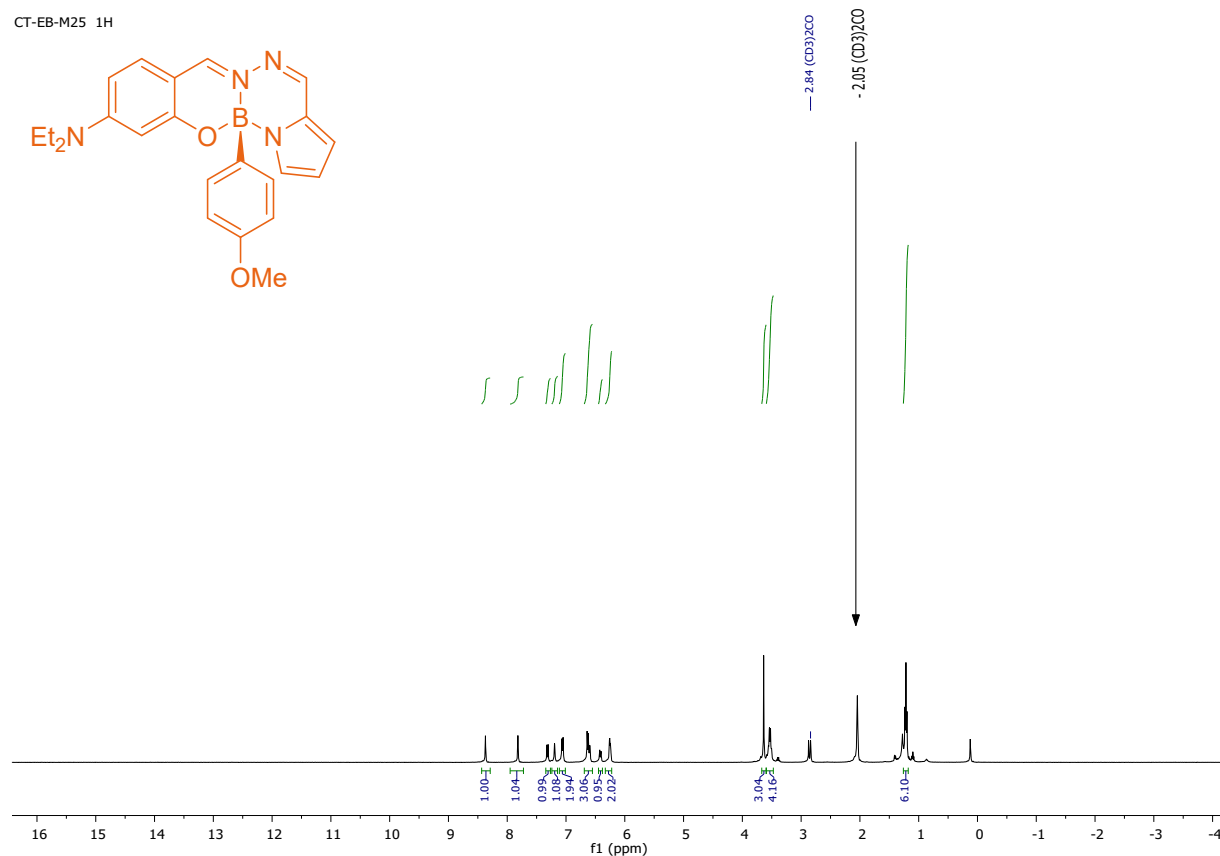

CihangirBey-1F-13cNMR  
13C OBSERVE

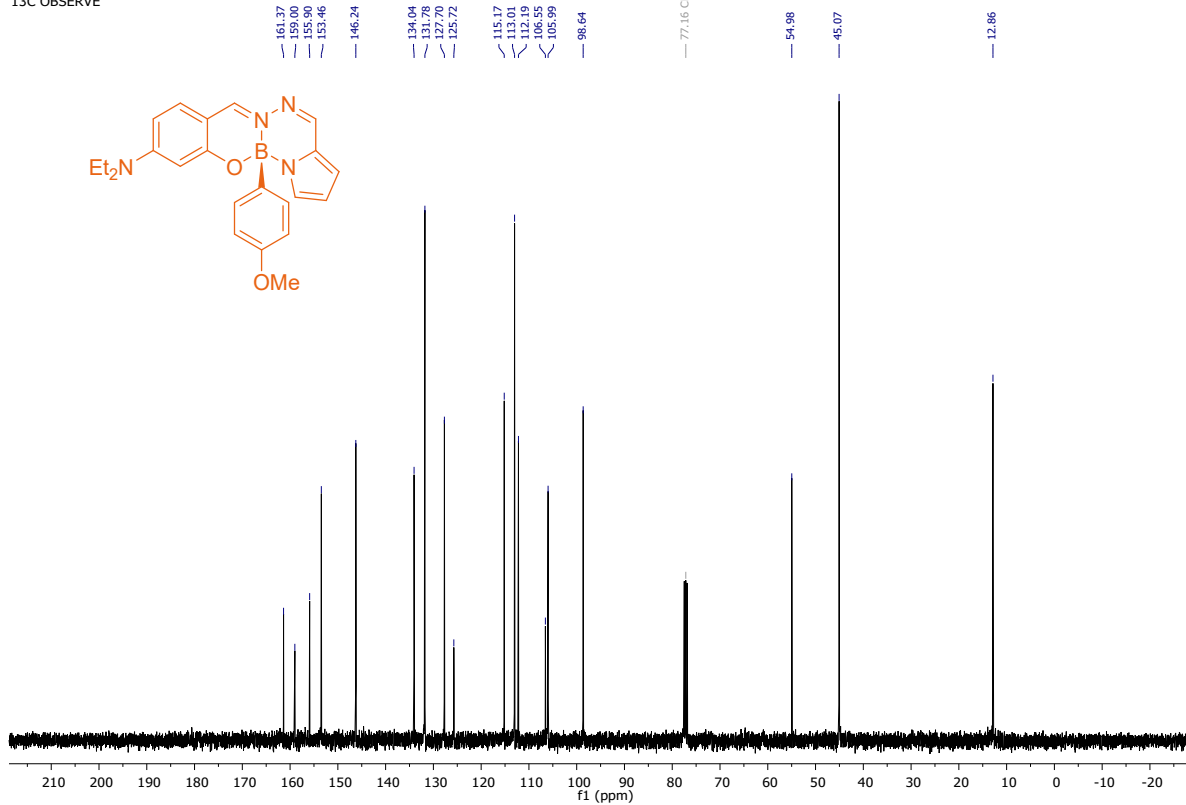

Figure S 28.  $^{13}\text{C}$  NMR spectrum of **1f**

CihangirBey-ODTU-1F-11B-NMR.1.1.1r  
CihangirBey-ODTU-1F-11B-NMR

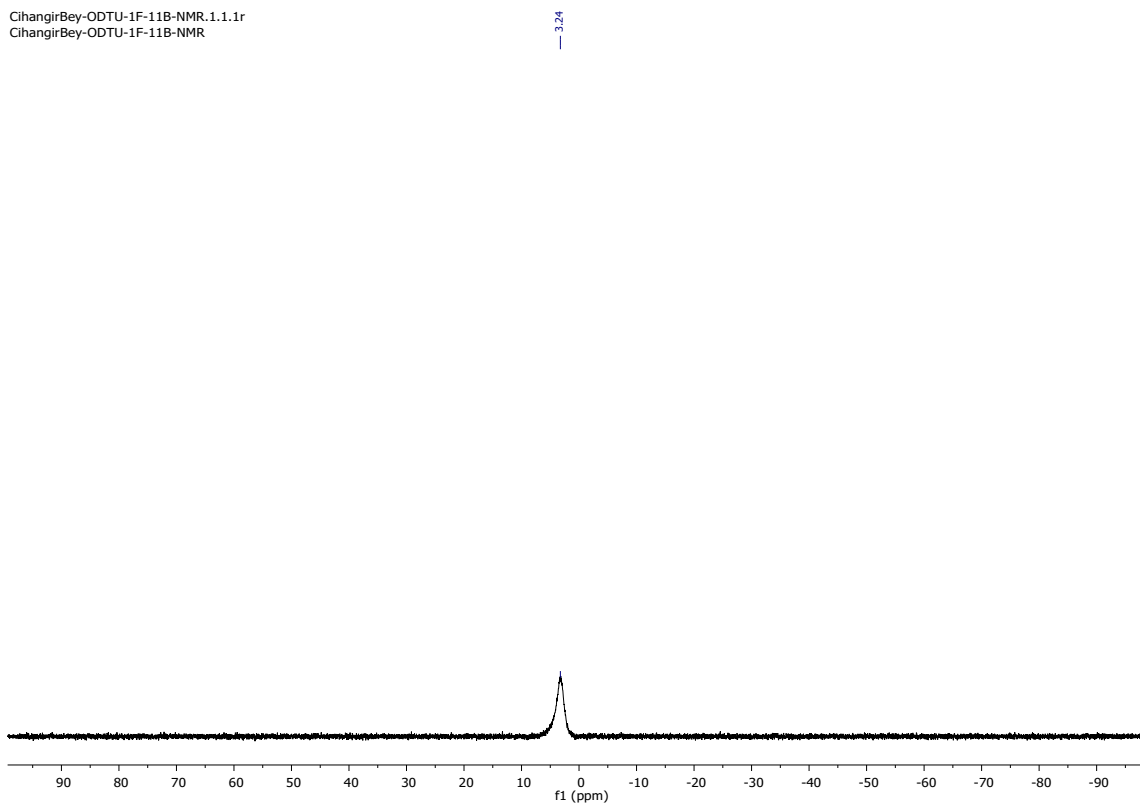

Figure S 29.  $^{11}\text{B}$  NMR spectrum (128 MHz) of **1f** in  $\text{CDCl}_3$



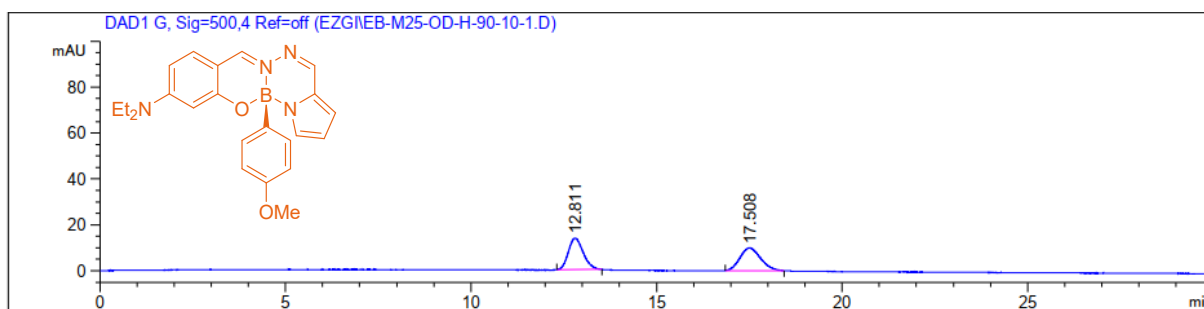

Signal 7: DAD1 G, Sig=500,4 Ref=off

| Peak # | RetTime [min] | Type | Width [min] | Area [mAU*s] | Height [mAU] | Area %  |
|--------|---------------|------|-------------|--------------|--------------|---------|
| 1      | 12.811        | BB   | 0.3300      | 382.37674    | 13.68368     | 50.1621 |
| 2      | 17.508        | BB   | 0.4537      | 379.90616    | 9.85519      | 49.8379 |

Totals : 762.28290 23.53887

Figure S 30. HPLC chromatogram of **1f**

### 3.7 BOSPYR **1g**

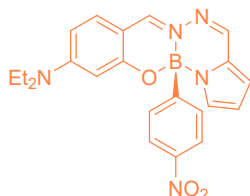

Compound **1g** was isolated as an orange solid in 17% yield (35.3 mg). **<sup>1</sup>H NMR** (400 MHz, Chloroform-*d*)  $\delta$  8.14 (s, 1H), 7.96 (d,  $J$  = 8.7 Hz, 2H), 7.77 (s, 1H), 7.36 (d,  $J$  = 8.7 Hz, 2H), 7.29 – 7.22 (m, 1H), 7.09 (d,  $J$  = 9.6 Hz, 1H), 6.66 (dd,  $J$  = 3.5, 1.3 Hz, 1H), 6.35 (dd,  $J$  = 3.5, 2.3 Hz, 1H), 6.28 (dd,  $J$  = 7.0, 2.3 Hz, 2H), 3.59 – 3.27 (m, 4H), 1.25 (t,  $J$  = 7.1 Hz, 6H). **<sup>13</sup>C NMR** (100 MHz, Chloroform-*d*)  $\delta$  160.9, 156.3, 153.9, 147.4, 146.1, 134.3, 131.3, 127.4, 125.3, 122.4, 115.8, 112.7, 106.6, 106.4, 98.6, 45.2, 12.8 ppm. **<sup>11</sup>B NMR** (128 MHz, Chloroform-*d*)  $\delta$  2.37 (bs). **HRMS** (APCI) calculated for  $C_{22}H_{23}BN_5O_3$   $^{10}B$   $[M+H]^+$ , 415.1930; found, 415.1925. **HPLC analysis** (OD-H, n-Hexane/Isopropanol, 90:10, 1 mL/min, 474 nm)  $t_1$  = 18.67 min and  $t_2$  = 26.24 min.

ChangirBey-1G-1hNMR  
STANDARD 1H OBSERVE

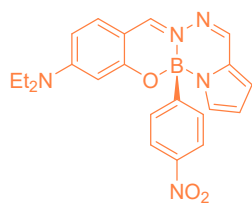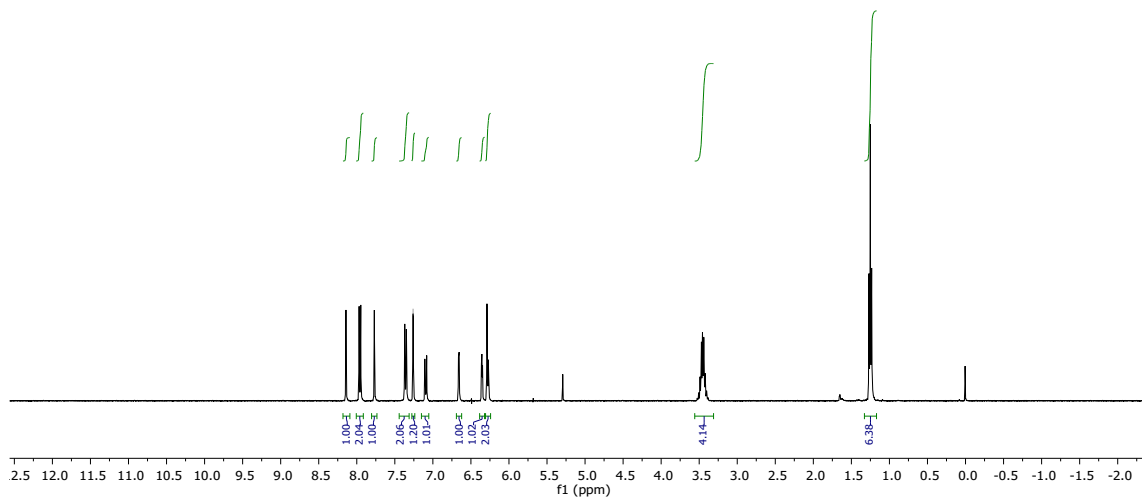

Figure S 31. <sup>1</sup>H NMR spectrum of **1g**

ChangirBey-1G-13cNMR  
13C OBSERVE

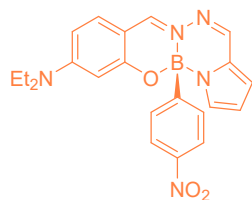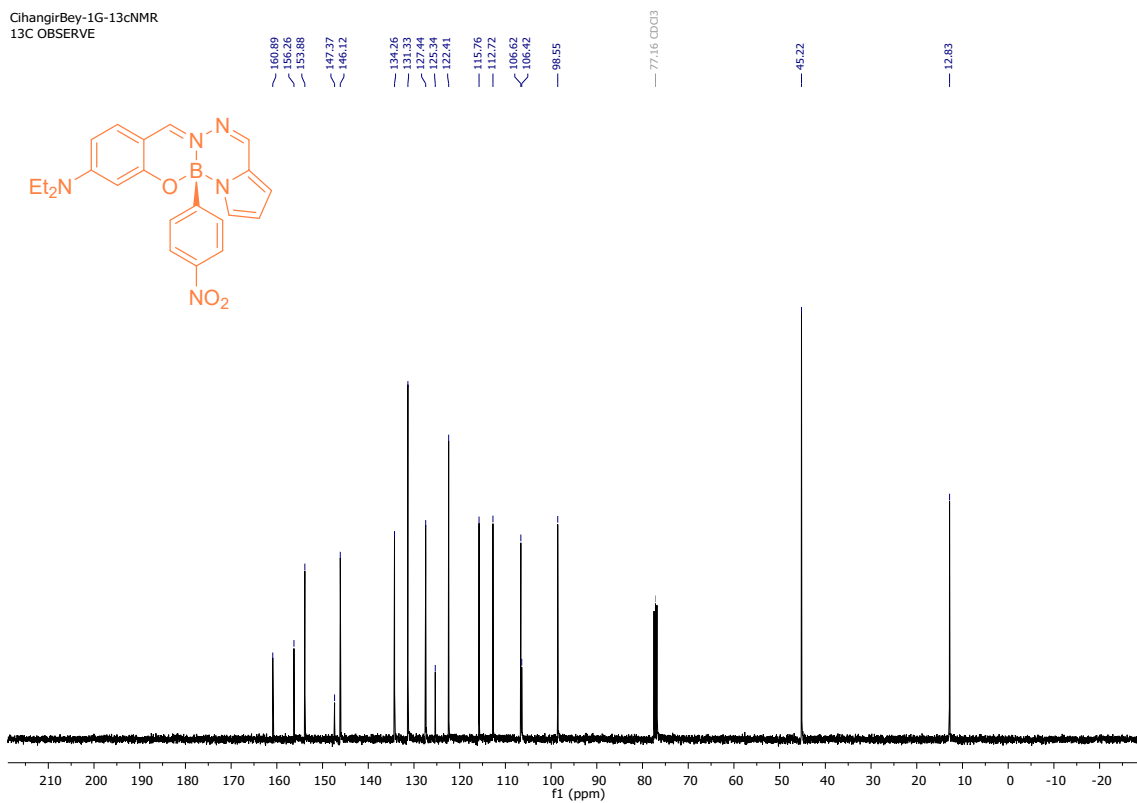

Figure S 32. <sup>13</sup>C NMR spectrum of **1g**

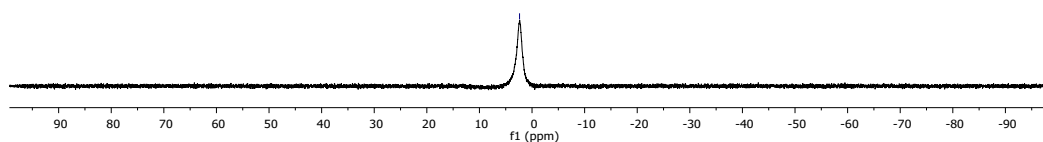

Figure S 33.  $^{11}\text{B}$  NMR spectrum (128 MHz) of **1g** in  $\text{CDCl}_3$

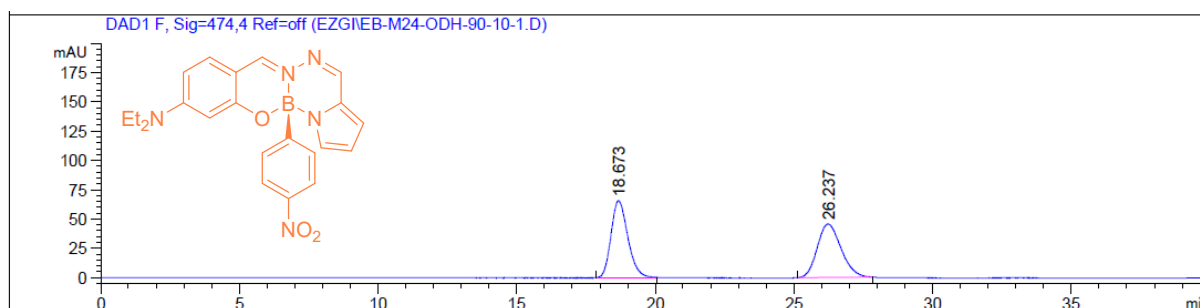

Signal 6: DAD1 F, Sig=474,4 Ref=off

| Peak # | RetTime [min] | Type | Width [min] | Area [mAU*s] | Height [mAU] | Area %  |
|--------|---------------|------|-------------|--------------|--------------|---------|
| 1      | 18.673        | BV R | 0.5073      | 2756.71045   | 65.59792     | 50.3852 |
| 2      | 26.237        | BB   | 0.6979      | 2714.56201   | 45.57777     | 49.6148 |

Totals : 5471.27246 111.17569

Figure S 34. HPLC chromatogram of **1g**

### 3.8 BOSPYR 1h

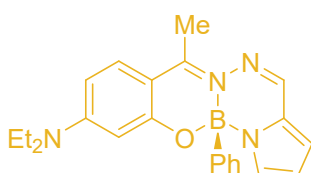

**1h** was isolated as an orange solid in 16% yield (22.8 mg).  $^1\text{H}$  NMR (400 MHz, Chloroform- $d$ )  $\delta$  7.80 (s, 1H), 7.35 (d,  $J = 8.9$

Hz, 1H), 7.32 (s, 1H), 7.20 – 7.08 (m, 5H), 6.64 (d,  $J = 3.3$  Hz, 1H), 6.33 (s, 3H), 3.49 – 3.36 (m, 4H), 2.67 (s, 3H), 1.23 (t,  $J = 7.0$  Hz, 6H).  $^{13}\text{C}$  NMR (100 MHz, Chloroform- $d$ )  $\delta$  163.6, 160.3, 154.2, 145.3, 131.3, 130.7, 127.9, 127.4, 127.0, 125.4, 115.2, 112.3, 108.7, 106.2, 100.0, 45.4, 14.5, 12.8 ppm.  $^{11}\text{B}$  NMR (128 MHz, Chloroform- $d$ )  $\delta$  2.61 (bs). HRMS (APCI) calculated for  $\text{C}_{23}\text{H}_{26}\text{BN}_4\text{O}$   $^{10}\text{B}$   $[\text{M}+\text{H}]^+$ , 384.2236; found, 384.2231. HPLC analysis (OD-H, n-Hexane/Isopropanol, 98:2, 1 mL/min, 474 nm)  $t_1 = 8.26$  min and  $t_2 = 9.02$  min.

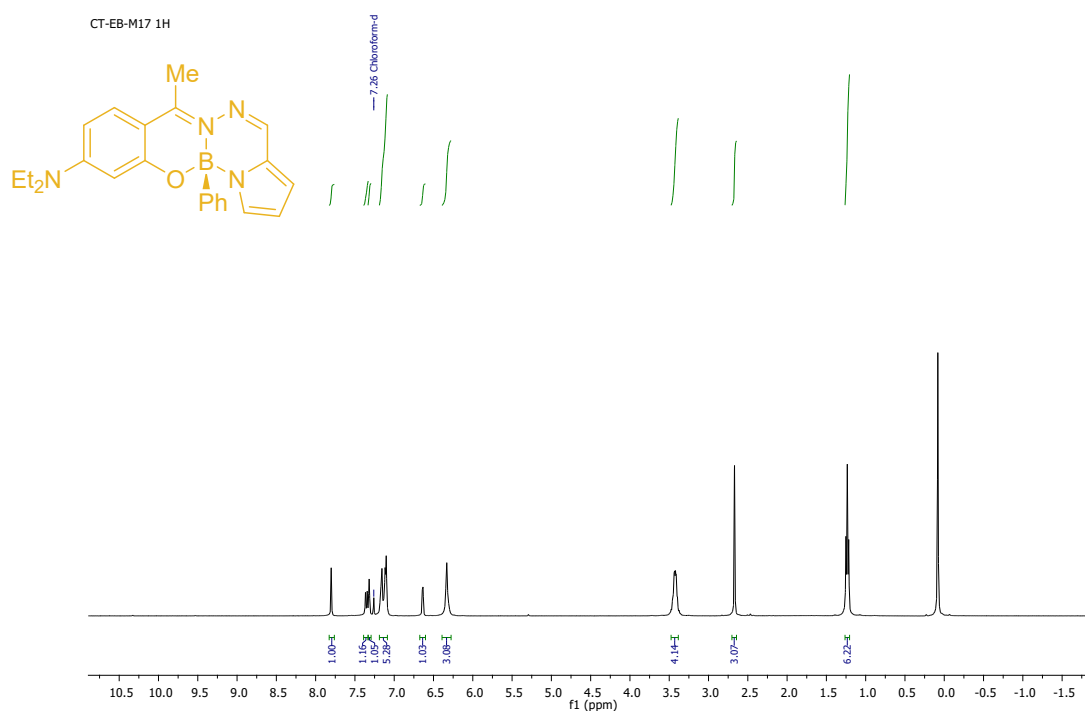

Figure S 35.  $^1\text{H}$  NMR spectrum of **1h**

CT-EB-M17 13C

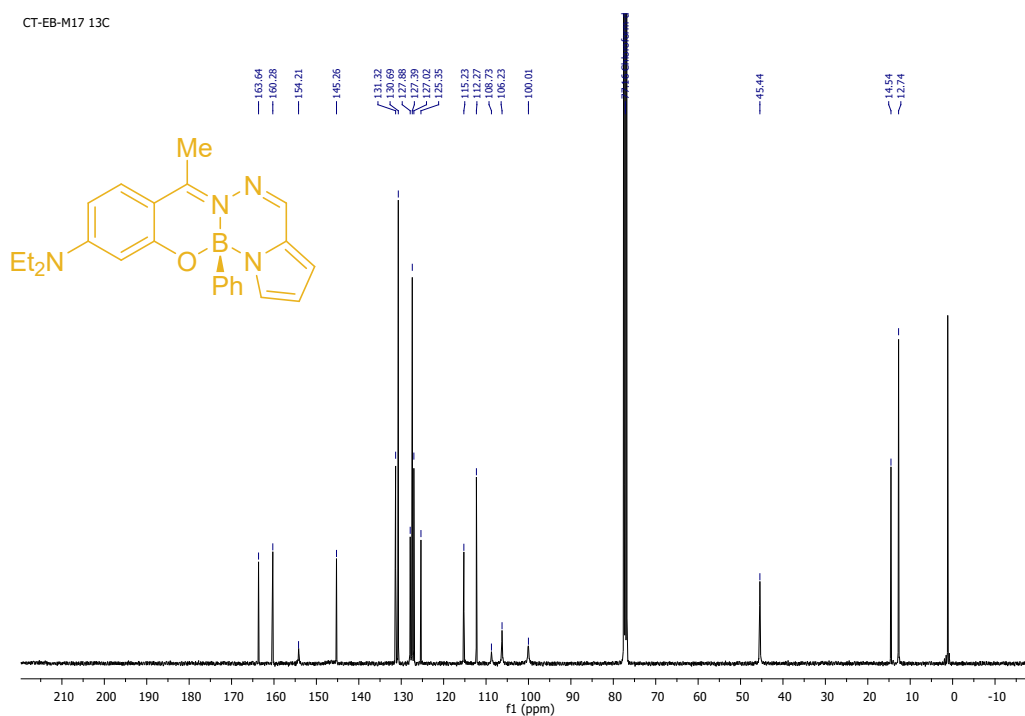

Figure S 36. <sup>13</sup>C NMR spectrum of **1h**

ChangirBey-ODTU-1H-11B-NMR.1.1.1r  
ChangirBey-ODTU-1H-11D-NMR

-2.61

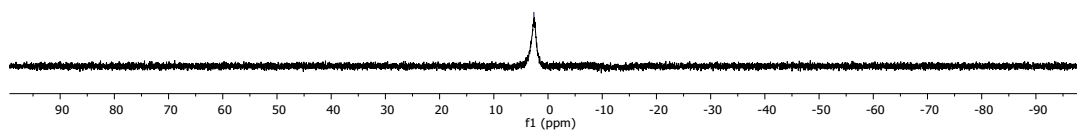

Figure S 37. <sup>11</sup>B NMR spectrum (128 MHz) of **1h** in CDCl<sub>3</sub>

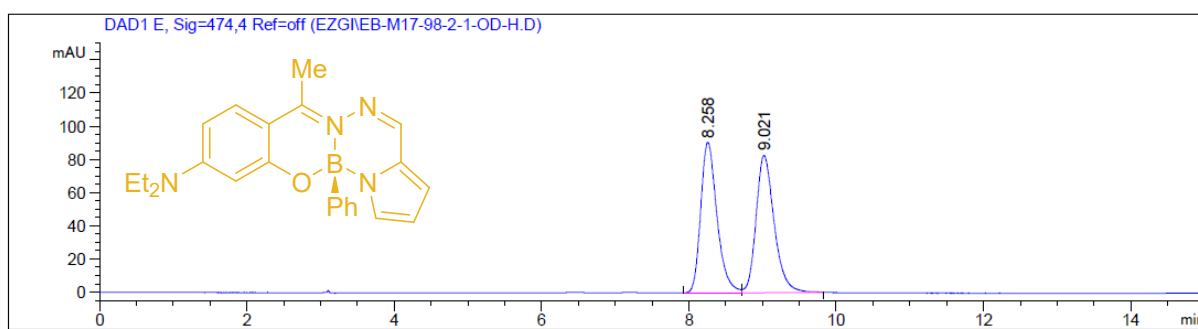

Signal 5: DAD1 E, Sig=474,4 Ref=off

| Peak # | RetTime [min] | Type | Width [min] | Area [mAU*s] | Height [mAU] | Area %  |
|--------|---------------|------|-------------|--------------|--------------|---------|
| 1      | 8.258         | BV   | 0.2271      | 1389.92542   | 90.54473     | 49.6381 |
| 2      | 9.021         | VB   | 0.2531      | 1410.19214   | 82.43614     | 50.3619 |

Totals : 2800.11755 172.98087

Figure S 38. HPLC chromatogram of **1h**

#### 4. Optical Characterization of the Dyes 1a-h

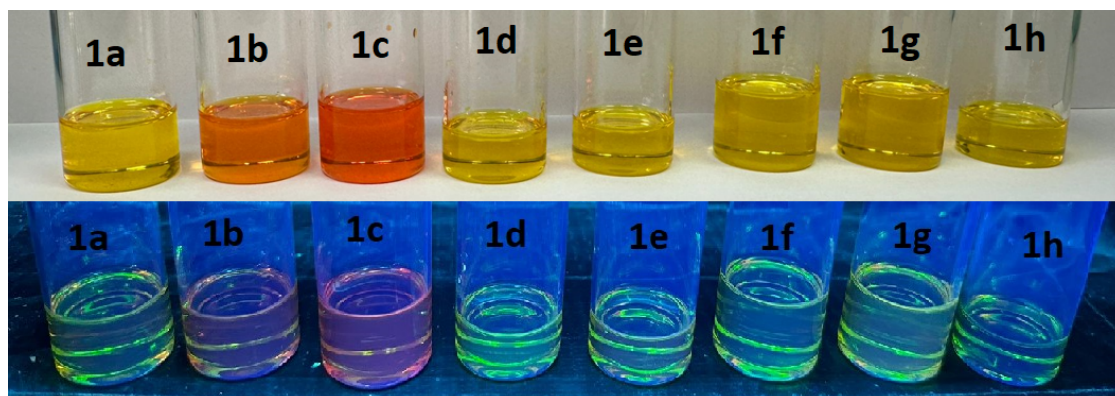

Figure S 39. Digital photographs of 1 mM DMSO solutions of each dye under daylight and 365 nm UV light irradiation (bottom).

#### 4.1 Optical characterization of 1a

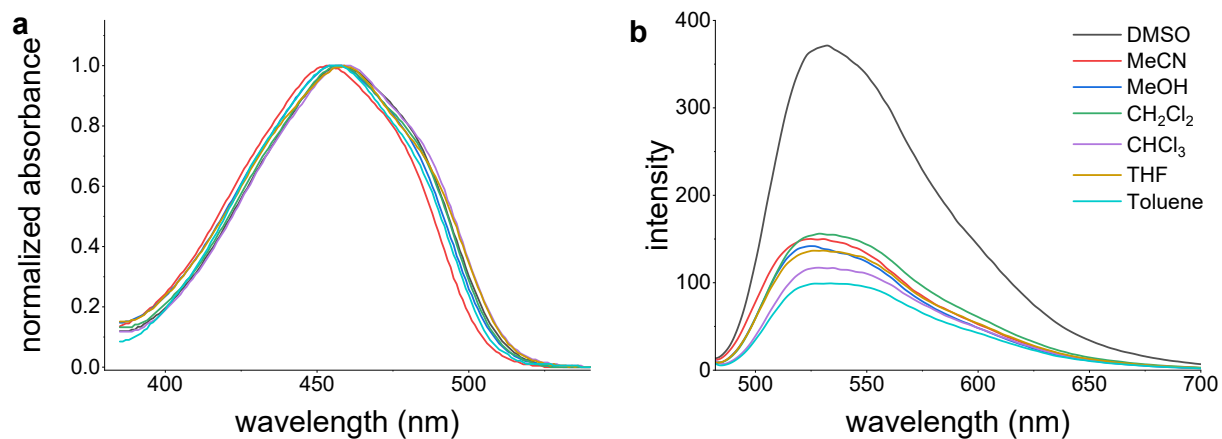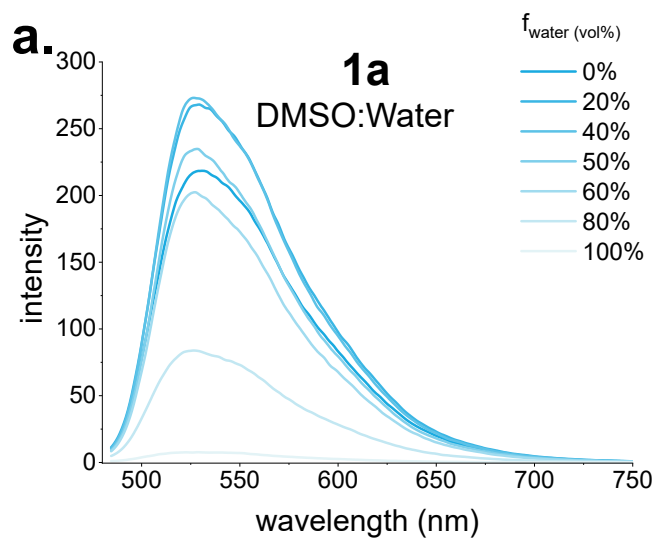

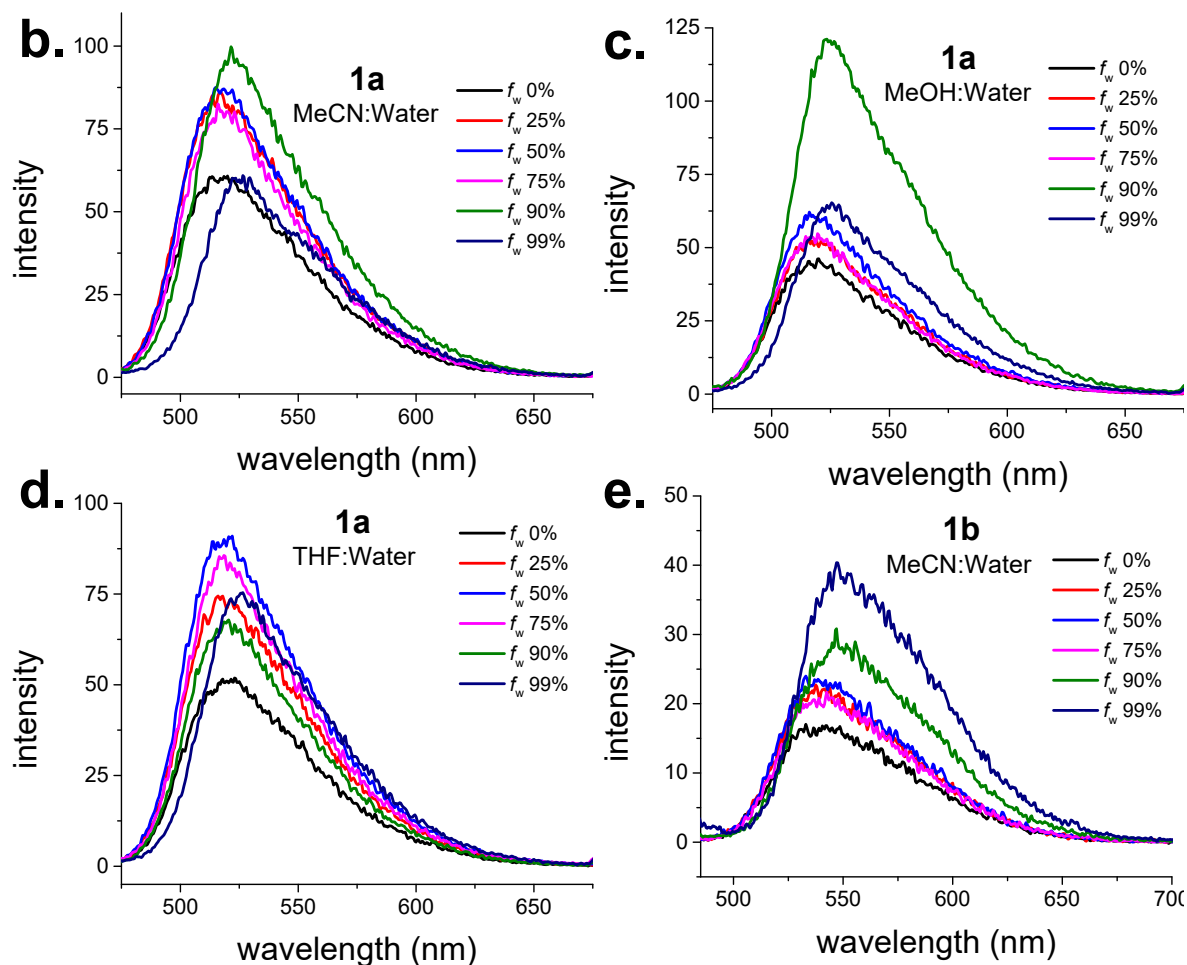

Figure S 41. Fluorescence emission spectra of **1a** and **1b** in water–DMSO/MeCN/MeOH/THF mixtures with varying water fractions [ $f_{\text{water}}$  (vol%): 0–100%] at 25 °C.

Table S 1. Optical characterization of the dyes **1a–h** in DMSO.<sup>a</sup>

| BOSPYR    | $\lambda_{\text{abs}}$<br>[nm] | $\epsilon_{\text{max}}$<br>[ $M^{-1}cm^{-1}$ ] | $\lambda_{\text{ems}}$<br>[nm] | $\Delta\lambda$<br>[nm;<br>$cm^{-1}$ ] | $\Phi_{flb}$ | $\tau_{pc}$<br>[ns] |
|-----------|--------------------------------|------------------------------------------------|--------------------------------|----------------------------------------|--------------|---------------------|
| <b>1a</b> | 457                            | 45600                                          | 530                            | 73; 3014                               | 0.034        | 0.94                |
| <b>1b</b> | 476                            | 23000                                          | 555                            | 79; 2990                               | 0.020        | 1.09                |
| <b>1c</b> | 481                            | 29600                                          | 573                            | 92; 3338                               | 0.042        | 0.71                |
| <b>1d</b> | 454                            | 36900                                          | 521                            | 67; 2833                               | 0.091        | 1.21                |
| <b>1e</b> | 437                            | 8800                                           | 557                            | 120; 4930                              | 0.040        | 2.00                |
| <b>1f</b> | 461                            | 28500                                          | 528                            | 67; 2753                               | 0.058        | 1.37                |
| <b>1g</b> | 462                            | 25700                                          | 526                            | 64; 2633                               | 0.023        | 0.47                |
| <b>1h</b> | 456                            | 39900                                          | 524                            | 68; 2846                               | 0.015        | 1.49                |

<sup>a</sup>A concentration of 2  $\mu\text{M}$  was used for all the dyes in the described investigations. <sup>b</sup>Relative fluorescence quantum yields were calculated using quinine sulphate as the reference ( $\Phi_{fl} = 0.60$  in 0.5 M  $\text{H}_2\text{SO}_4$ ; see ref 21 of the paper). <sup>c</sup>Fluorescence lifetimes (prompt) were all characterized by a monoexponential fit.

## 5. Thermal, Configurational, (Photo)chemical Stability of **1a**



## 5.1 Thermal stability test;

The thermal stability of racemic **1a** was evaluated by heating toluene solutions (0.1 mM) at 50, 75, and 100 °C for one hour in sealed vessels. Additionally, a solution was heated at 120 °C for one hour under an open atmosphere. TLC analysis of all samples indicated no detectable decomposition.

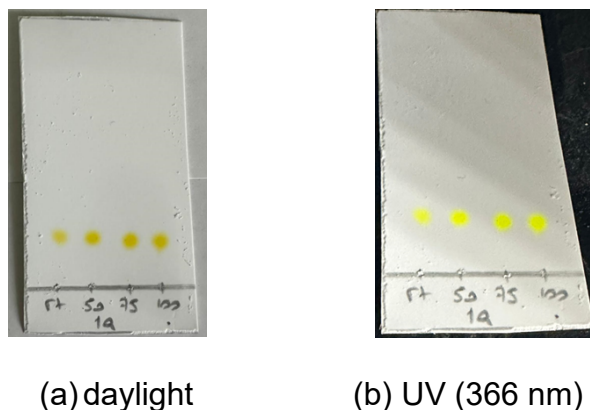

Figure S 41. TLC analysis of compound **1a** after heating at various temperatures for 1 hour.

## 5.2 Configurational stability test; chiral HPLC reports

The configurational stability of the first-eluting enantiomer (**(-)-1a**) was assessed by heating toluene solutions (0.1 mM) at 50, 75, and 100 °C for 1 h in sealed vessels, and at 120 °C for 1 h under an open atmosphere. Subsequent chiral HPLC analysis revealed no detectable epimerization, indicating high configurational stability. The HPLC chromatograms were obtained at a column temperature of 18 °C.

### I. Rac-**1a**

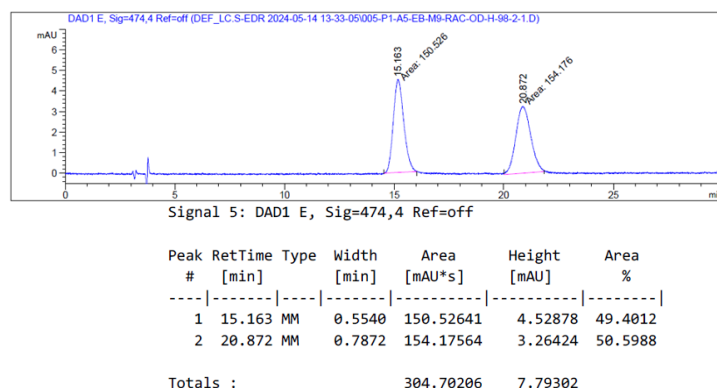

### II. Fast-eluting enantiomer, **(-)-1a**

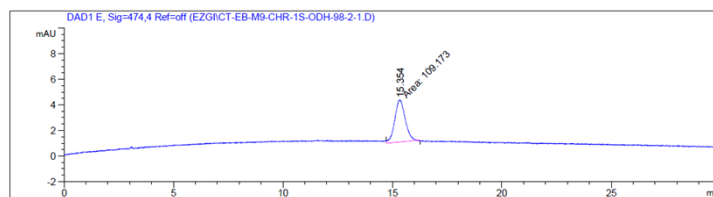

Signal 5: DAD1 E, Sig=474,4 Ref=off

| Peak # | RetTime [min] | Type | Width [min] | Area [mAU*s] | Height [mAU] | Area %   |
|--------|---------------|------|-------------|--------------|--------------|----------|
| 1      | 15.354        | MM   | 0.5504      | 109.17337    | 3.30573      | 100.0000 |

Totals :                    109.17337    3.30573

### III. Slow-eluting enantiomer, (+)-1a

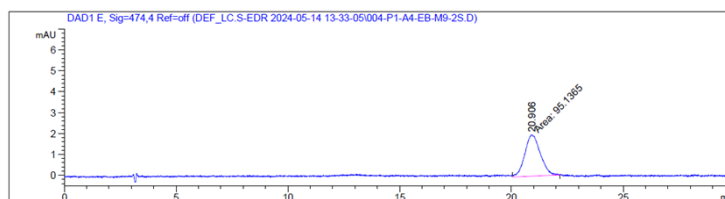

Signal 5: DAD1 E, Sig=474,4 Ref=off

| Peak # | RetTime [min] | Type | Width [min] | Area [mAU*s] | Height [mAU] | Area %   |
|--------|---------------|------|-------------|--------------|--------------|----------|
| 1      | 20.906        | MM   | 0.8025      | 95.13651     | 1.97591      | 100.0000 |

Totals :                    95.13651    1.97591

### IV. Heating of (-)-1a (fast-eluting enantiomer) at 50 °C for 1 h.

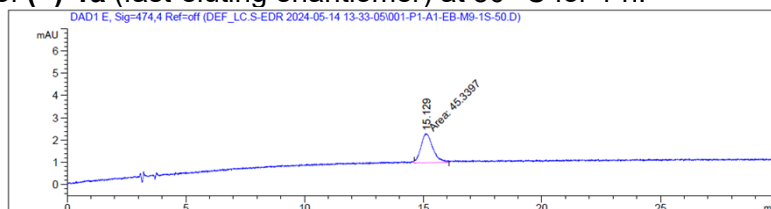

Signal 5: DAD1 E, Sig=474,4 Ref=off

| Peak # | RetTime [min] | Type | Width [min] | Area [mAU*s] | Height [mAU] | Area %   |
|--------|---------------|------|-------------|--------------|--------------|----------|
| 1      | 15.129        | MM   | 0.5738      | 45.33974     | 1.31705      | 100.0000 |

Totals :                    45.33974    1.31705

### V. Heating of (-)-1a (fast-eluting enantiomer) at 75 °C for 1 h.

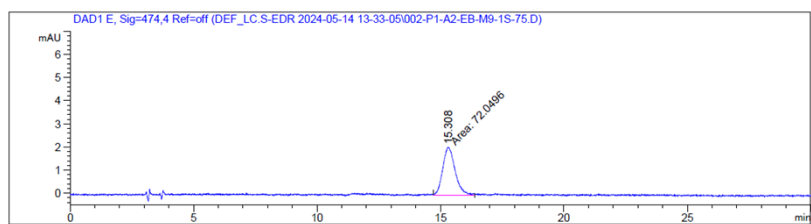

Signal 5: DAD1 E, Sig=474,4 Ref=off

| Peak # | RetTime [min] | Type | Width [min] | Area [mAU*s] | Height [mAU] | Area %   |
|--------|---------------|------|-------------|--------------|--------------|----------|
| 1      | 15.308        | MM   | 0.5774      | 72.04960     | 2.07960      | 100.0000 |

Totals :                                 72.04960     2.07960

VI. Heating of (-)-1a (fast-eluting enantiomer) at 100 °C for 1 h.

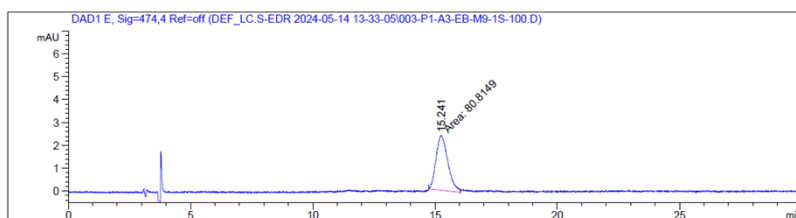

Signal 5: DAD1 E, Sig=474,4 Ref=off

| Peak # | RetTime [min] | Type | Width [min] | Area [mAU*s] | Height [mAU] | Area %   |
|--------|---------------|------|-------------|--------------|--------------|----------|
| 1      | 15.241        | MM   | 0.5569      | 80.81493     | 2.41880      | 100.0000 |

Totals :                                 80.81493     2.41880

VII. Heating of (-)-1a (fast-eluting enantiomer) at 120 °C for 1 h (open atm).

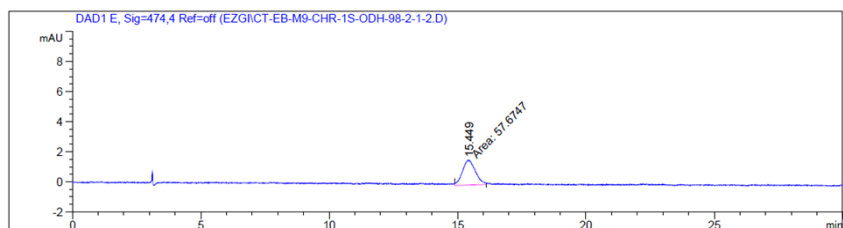

Signal 5: DAD1 E, Sig=474,4 Ref=off

| Peak # | RetTime [min] | Type | Width [min] | Area [mAU*s] | Height [mAU] | Area %   |
|--------|---------------|------|-------------|--------------|--------------|----------|
| 1      | 15.449        | MM   | 0.5810      | 57.67474     | 1.65442      | 100.0000 |

Totals :                                 57.67474     1.65442

### 5.3 Chemical stability test

Motivated by the observed thermal stability, the acid-base stability of *rac-1a* was subsequently evaluated. Equimolar dichloromethane solutions (1 mM) of **1a** and either acetic acid (AA), trifluoroacetic acid (TFA), triethylamine (TEA), or piperidine were stirred at room temperature for 1 hour. No discernible decomposition was observed in any case.

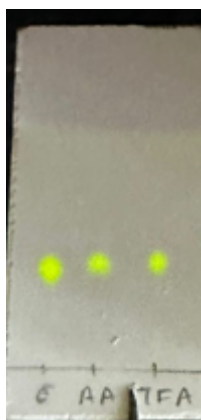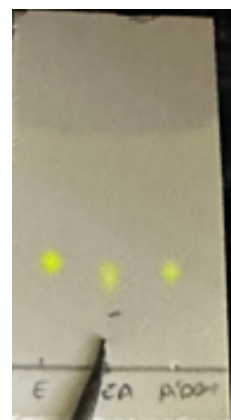

(a) TLC of acid-stability test at 366 nm      (b) TLC of base-stability test at 366 nm

Figure S 42. TLC analysis of *rac-1a* after exposure to acids and bases.

Only trifluoroacetic acid induced a color change from yellow to orange after 2 days, indicative of boron bridge cleavage (confirmed by HRMS, Figure S37). No discernible degradation was observed for the other tested conditions (acetic acid, triethylamine, piperidine).

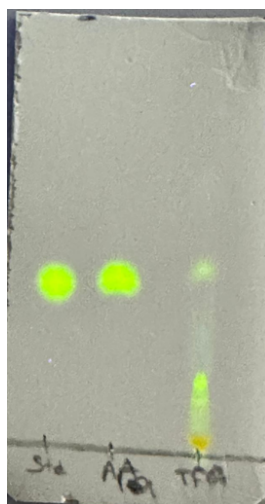

(a) TLC plate of the reaction mixture after 2 days of exposure to TFA (*rac-1a* +TFA), visualized under UV light at 366 nm.

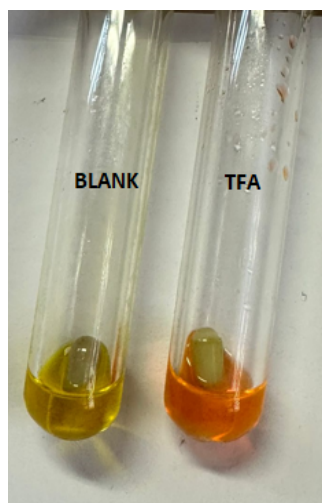

(b) Color of the solution after 2 days of exposure to TFA (*rac-1a* + TFA), visualized under daylight.

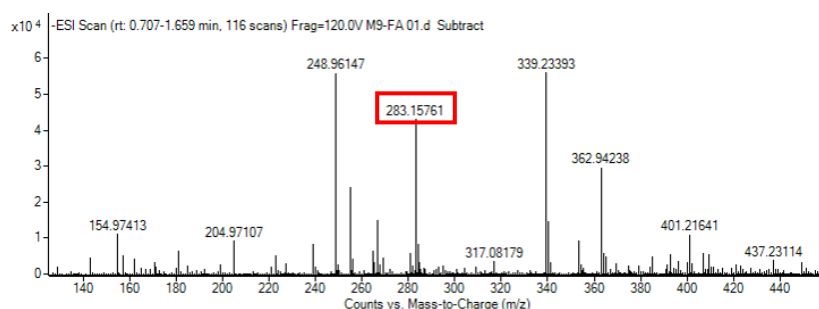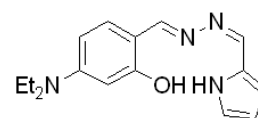

Chemical Formula: C<sub>16</sub>H<sub>20</sub>N<sub>4</sub>O  
 Calculated for [M-H]<sup>-</sup>:  
 Exact Mass: 283.15590 u  
 Found for [M-H]<sup>-</sup>: 283.15761 u

(c) HRMS result of chemical stability experiment: **1a** with TFA

Figure S 43. TLC plate, color change, and HRMS result of *rac-1a* treated with TFA.

## 5.4 Chemical stability of **1e**

Compound **1e** exhibited gradual discoloration in DMSO solution over time, indicative of degradation. This observation was corroborated by TLC analysis and time-dependent fluorescence measurements. To assess photostability, compound **1e** in DMSO was subjected to intermittent light pulses ( $\lambda_{\text{exc}} = 440 \text{ nm}$ , pulse interval: 10 s, total exposure: 5400 s). As depicted in Figure S38, a progressive decrease in fluorescence intensity was observed, confirming the compound's photosensitivity.

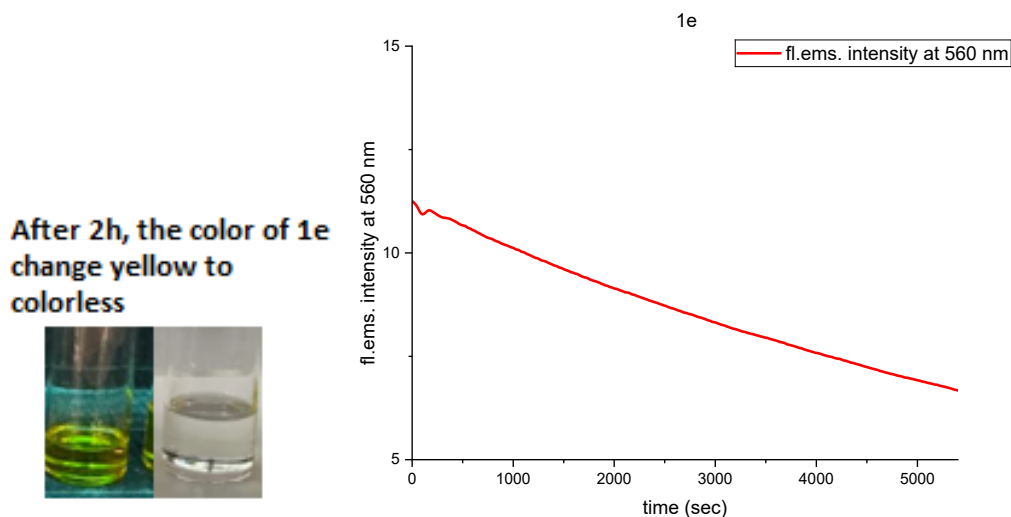

Figure S 44. Chemical stability of **1e**, time-dependent fluorescence intensity profile of **1e** (2  $\mu$ M) in DMSO at 560 nm. A laser pulse of 440 nm is given for 5400 sec with 10-sec intervals.

The thermal stability of compound **1e** was investigated by heating a toluene solution (0.1 mM) at 100 °C for 1 hour (Figure S39, entry 1). As a control, a toluene solution of **1e** was stirred at room temperature for 1 hour (Figure S39, entry 2). To evaluate chemical stability, equimolar mixtures of **1e** (1 mM) with acetic acid, trifluoroacetic acid, triethylamine, and piperidine in dichloromethane were stirred at room temperature for 1 hour (Figure S39, entries 3-6, respectively). Additionally, the stability of **1e** in DMSO was assessed under identical conditions (Figure S39, entry 7). While **1e** demonstrated stability towards heat, acetic acid, and ambient conditions, exposure to trifluoroacetic acid, triethylamine, piperidine, and DMSO resulted in notable degradation.

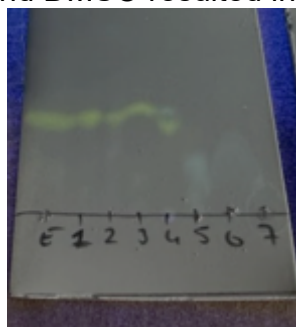

Figure S 45. TLC analysis of compound **1e** stability. TLC under UV illumination (366 nm).

### 5.5 Photostability test

The photostability of the racemic dye **1a** was evaluated in DMSO by exposing it to a light pulse ( $\lambda_{\text{ex}}$  460 nm) for 5400 seconds, with intervals of 10 seconds between pulses, and measuring its fluorescence. As illustrated in Fig. S40, the dye demonstrated significant photostability, with its fluorescence remaining nearly unchanged throughout the testing period.

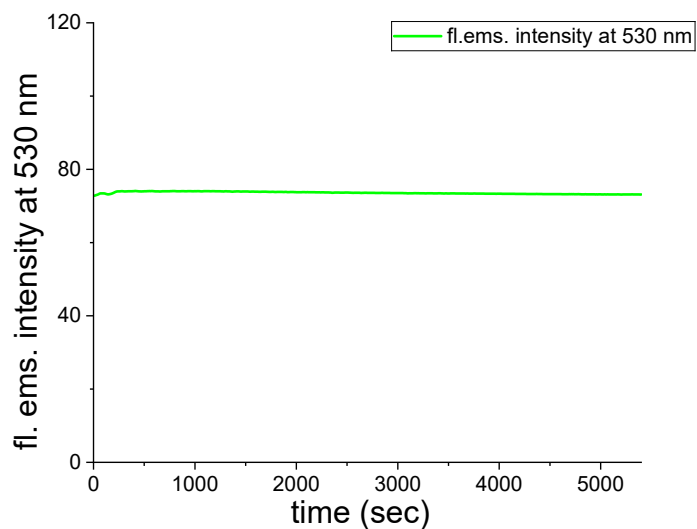

Figure S 46. Time-dependent fluorescence intensity profile of **1a** (2  $\mu\text{M}$ ) in DMSO at 530 nm. A laser pulse of 460 nm is given for 5400 sec with 10-sec intervals.

## 6. Electrochemical Properties

The electrochemical characteristics of compound **1a** were investigated using differential pulse voltammetry (DPV). The experiments were conducted relative to an Ag/AgCl reference electrode in a degassed, anhydrous acetonitrile solution, with  $[\text{Bu}_4\text{N}^+][\text{PF}_6^-]$  (0.1 M) as the supporting electrolyte. The electrochemical measurement results, along with the calculated HOMO/LUMO energy levels, are presented in Table S2. There is a correlation between the results of the electrochemical measurements and the results of the computational studies.

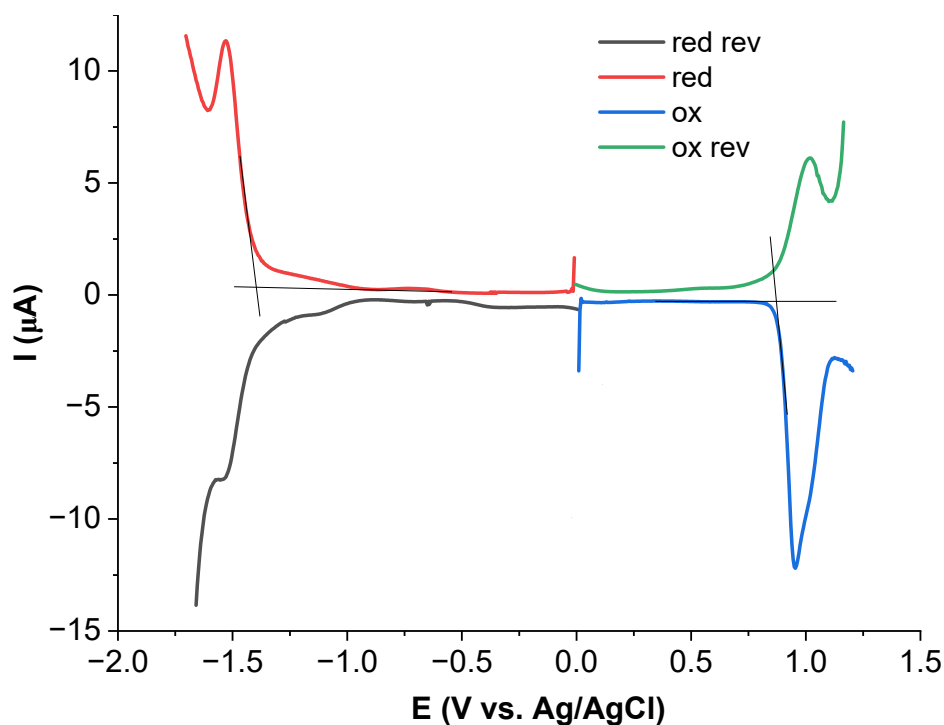

Figure S 47. DPV of **1a** in MeCN

Table S 2. Electrochemical properties of **1a** in MeCN

|           | $E_{\text{ox}}^{\text{onset}}$<br>(V) <sup>a</sup> | $E_{\text{red}}^{\text{onset}}$<br>(V) <sup>a</sup> | $E_{\text{HOMO}}$<br>(eV) <sup>b</sup> | $E_{\text{LUMO}}$<br>(eV) <sup>c</sup> | $E_{\text{g}}^{\text{electro}}$<br>(eV) <sup>d</sup> | $E_{\text{g}}^{\text{opt}}$<br>(eV) |
|-----------|----------------------------------------------------|-----------------------------------------------------|----------------------------------------|----------------------------------------|------------------------------------------------------|-------------------------------------|
| <b>1a</b> | 0.872                                              | -1.40                                               | - 5.58                                 | - 3.31                                 | 2.27                                                 | 2.3                                 |

<sup>a</sup>Calculated from the DPV, <sup>b</sup>Calculated with  $E_{\text{HOMO}}$ : - (4.71 +  $E_{\text{ox}}^{\text{onset}}$ )

<sup>c</sup>Calculated with  $E_{\text{LUMO}}$ : - (4.71 +  $E_{\text{red}}^{\text{onset}}$ ) <sup>d</sup>Calculated with  $E_{\text{gap}}$ :  $E_{\text{LUMO}} - E_{\text{HOMO}}$

## 7. Computational Studies

Geometry optimization and excited state calculations were performed by Density Functional Theory (DFT) and TD-DFT using B3LYP-D3,<sup>iii</sup> wB97XD<sup>iv</sup> and M06-2X<sup>v</sup> functionals and 6-311+(d) basis sets. The UV-Vis adsorption spectra and comparison with the experimental structure were used as validation of the method (Figure S49). B3LYP with Grimme D3-dispersion correction provided the closest results with the experimental study both for dihedral angle between chelating mean planes and  $\lambda_{\text{max}}$  in the UV-Vis. The UV-vis spectra calculation was in agreement with all BOSPYR dyes (Figure S50).



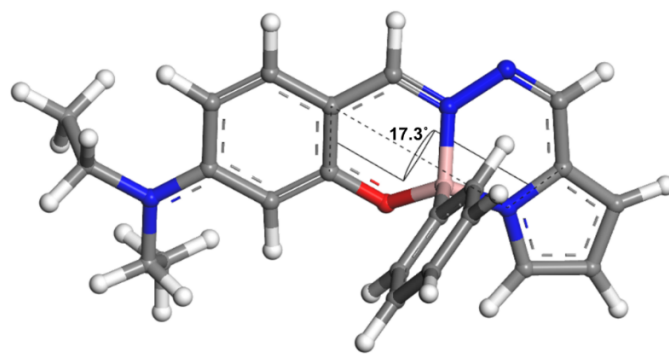

a

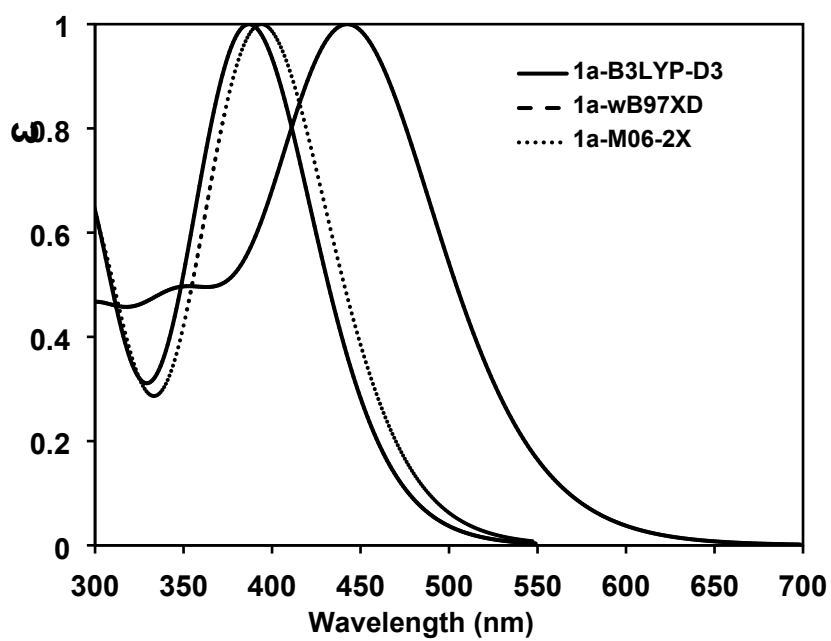

b

Figure S 48. a) Geometry optimized structure, b) Calculated UV-Vis spectra for **1a** by different functionals.

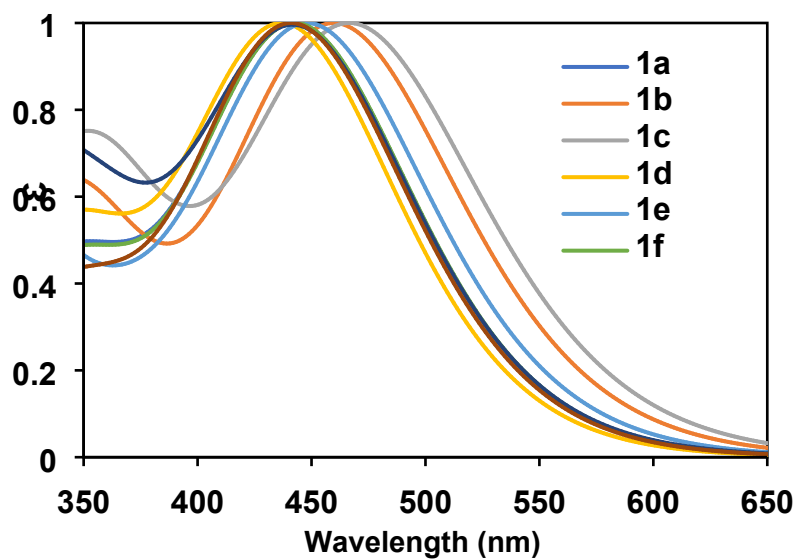

Figure S 49. Calculated UV-Vis for BOSPYPYR dyes (**1a–h**)

|           | $\mu$ | $\alpha$ | $\Delta\alpha$ | $\beta$  |
|-----------|-------|----------|----------------|----------|
| <b>1a</b> | 9.53  | 494.84   | 340.75         | 10648.85 |
| <b>1b</b> | 8.60  | 535.08   | 369.98         | 9360.86  |
| <b>1c</b> | 8.25  | 570.40   | 373.48         | 9285.42  |
| <b>1d</b> | 6.44  | 360.68   | 248.22         | 2574.71  |
| <b>1e</b> | 3.34  | 376.85   | 212.31         | 5278.20  |
| <b>1f</b> | 8.36  | 518.56   | 325.06         | 10813.75 |
| <b>1g</b> | 12.88 | 526.95   | 306.78         | 11105.11 |
| <b>1h</b> | 8.98  | 510.71   | 327.12         | 12026.99 |

Table S 3. Dipole Moment ( $\mu$ ), polarizability ( $\alpha$ ), anisotropy in the polarizability ( $\Delta\alpha$ ), first order hyperpolarizability ( $\beta$ ) calculated by DFT calculations.

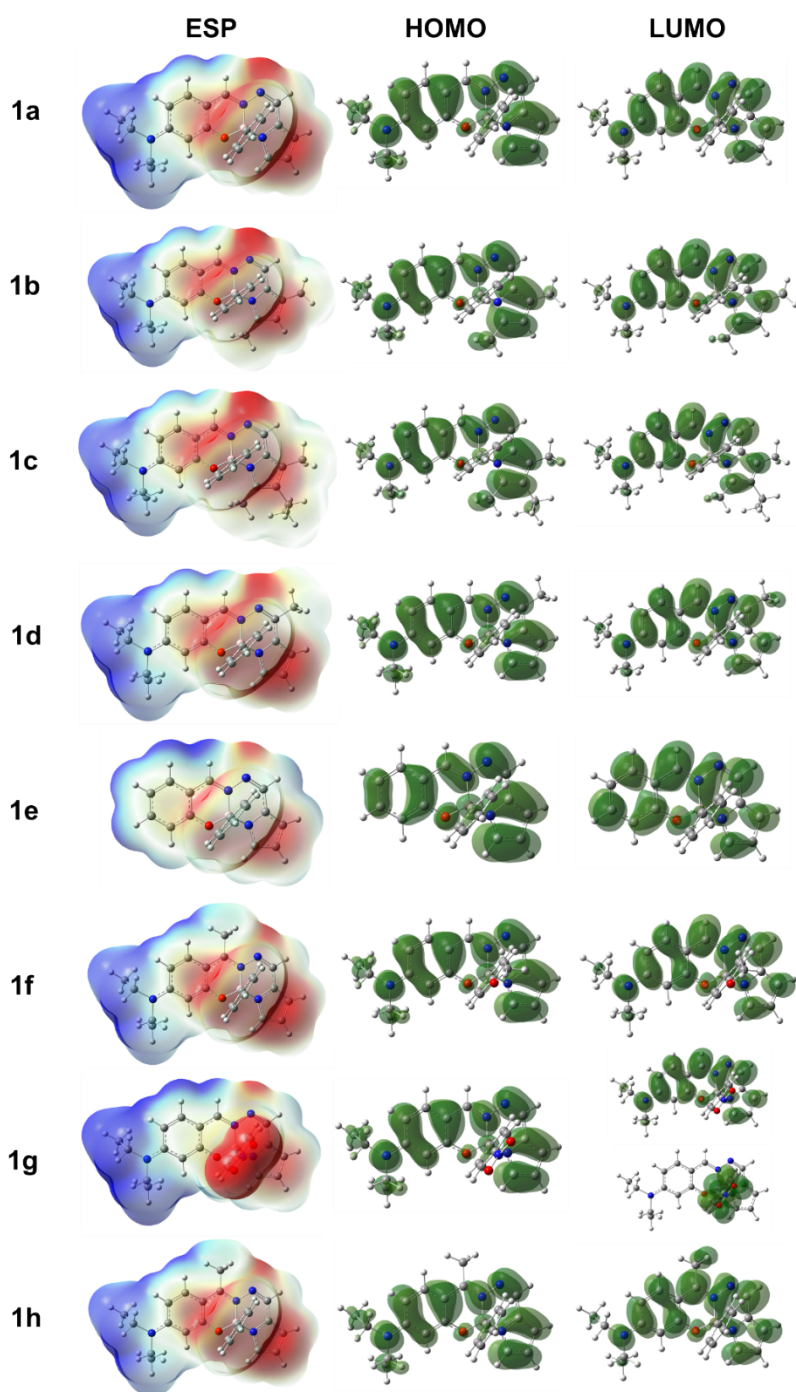

Figure S 50. ESP, HOMO and LUMO surfaces for 1a-1h structures at the ground state optimized geometries.

The most important singlet excited state transition energies, oscillatory frequencies and natural transition orbitals for singlet excitations with high oscillatory frequencies were determined for **1a-1h** (Table S 4, Figure S 52).

Table S 4. Frontier orbital energy levels, singlet excited state energy levels and their oscillatory frequencies.

|           | HOMO (GSOP) | LUMO  | $E_g$ | $E_g^{opt}$<br>$S_0-S_1$                  | ESOP  | $S_0-S_2$                                 | $S_0-S_3$        | $S_0-S_4$        | $S_0-S_5$        | $S_0-S_6$        | $S_0-S_7$        |
|-----------|-------------|-------|-------|-------------------------------------------|-------|-------------------------------------------|------------------|------------------|------------------|------------------|------------------|
| <b>1a</b> | -5.58       | -2.34 | 3.24  | <b>2.79</b><br><b><math>f=0.60</math></b> | -2.79 | 3.49<br>$f=0.20$                          | 3.63<br>$f=0.05$ | 3.72<br>$f=0.02$ | 4.02<br>$f=0.00$ | 4.08<br>$f=0.04$ | 4.14<br>$f=0.17$ |
| <b>1b</b> | -5.40       | -2.24 | 3.15  | <b>2.69</b><br><b><math>f=0.57</math></b> | -2.71 | 3.51<br>$f=0.28$                          | 3.53<br>$f=0.01$ | 3.69<br>$f=0.02$ | 4.00<br>$f=0.03$ | 4.01<br>$f=0.17$ | 4.11<br>$f=0.00$ |
| <b>1c</b> | -5.33       | -2.21 | 3.12  | <b>2.65</b><br><b><math>f=0.53</math></b> | -2.69 | 3.43<br>$f=0.25$                          | 3.52<br>$f=0.09$ | 3.61<br>$f=0.01$ | 3.97<br>$f=0.19$ | 3.99<br>$f=0.00$ | 4.13<br>$f=0.00$ |
| <b>1d</b> | -5.56       | -2.27 | 3.29  | <b>2.82</b><br><b><math>f=0.61</math></b> | -2.74 | 3.53<br>$f=0.24$                          | 3.63<br>$f=0.06$ | 3.77<br>$f=0.01$ | 4.08<br>$f=0.01$ | 4.10<br>$f=0.16$ | 4.13<br>$f=0.05$ |
| <b>1e</b> | -6.03       | -2.27 | 3.76  | <b>2.75</b><br><b><math>f=0.24</math></b> | -3.29 | 3.36<br>$f=0.05$                          | 3.42<br>$f=0.02$ | 3.67<br>$f=0.0$  | 3.79<br>$f=0.04$ | 4.15<br>$f=0.20$ | 4.41<br>$f=0.09$ |
| <b>1f</b> | -5.57       | -2.33 | 3.24  | <b>2.79</b><br><b><math>f=0.60</math></b> | -2.78 | 3.17<br>$f=0.00$                          | 3.49<br>$f=0.20$ | 3.65<br>$f=0.07$ | 3.99<br>$f=0.02$ | 4.09<br>$f=0.00$ | 4.18<br>$f=0.22$ |
| <b>1g</b> | -5.64       | -2.99 | 2.65  | 2.21<br>$f=0.00$                          | -3.43 | <b>2.79</b><br><b><math>f=0.61</math></b> | 2.95<br>$f=0.01$ | 3.25<br>$f=0.01$ | 3.49<br>$f=0.09$ | 3.50<br>$f=0.20$ | 3.65<br>$f=0.05$ |
| <b>1h</b> | -5.54       | -2.29 | 3.25  | <b>2.80</b><br><b><math>f=0.61</math></b> | -2.74 | 3.46<br>$f=0.15$                          | 3.64<br>$f=0.07$ | 3.75<br>$f=0.04$ | 4.05<br>$f=0.00$ | 4.10<br>$f=0.01$ | 4.22<br>$f=0.19$ |

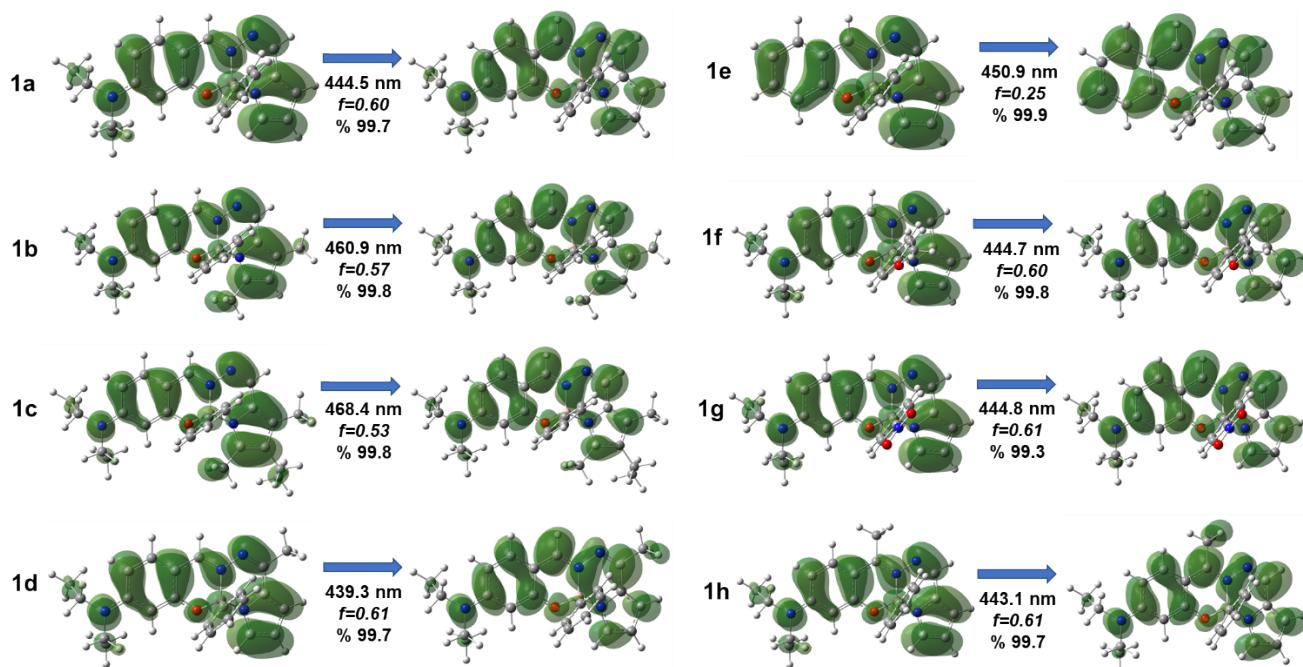

Figure S 51. Natural transition orbitals for singlet excitations with high oscillatory frequencies.

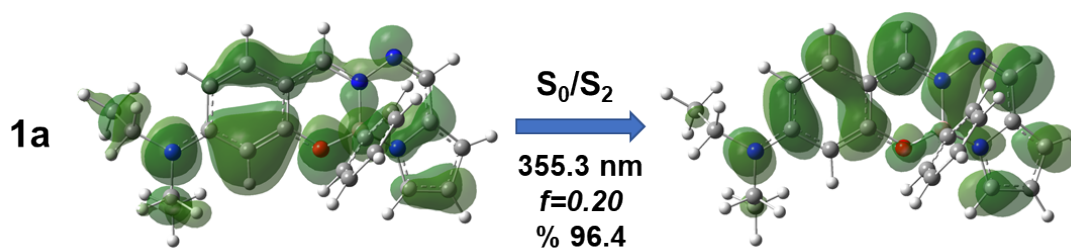

Figure S 52. Natural transition orbital for the  $S_0 \rightarrow S_2$  excitation for 1a which has the second highest oscillatory frequencies.

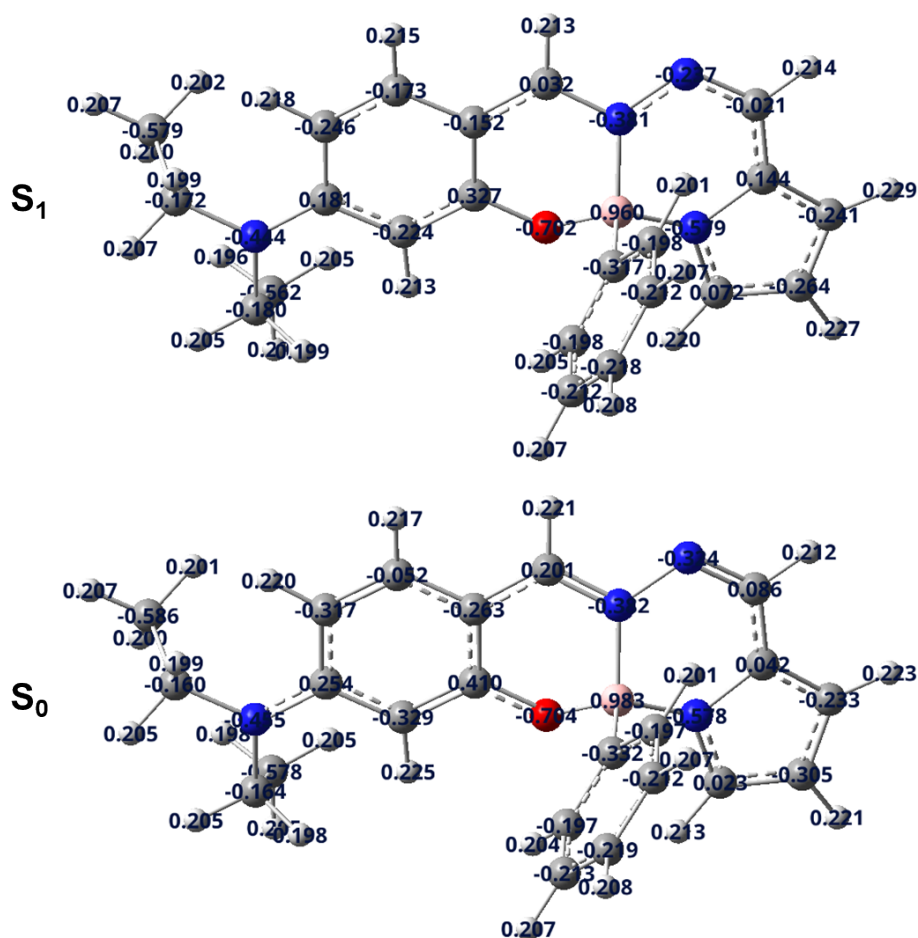

Figure S 53. Atomic charges calculated based on the natural population analysis for ground state and excited state geometries and electron densities for 1a.

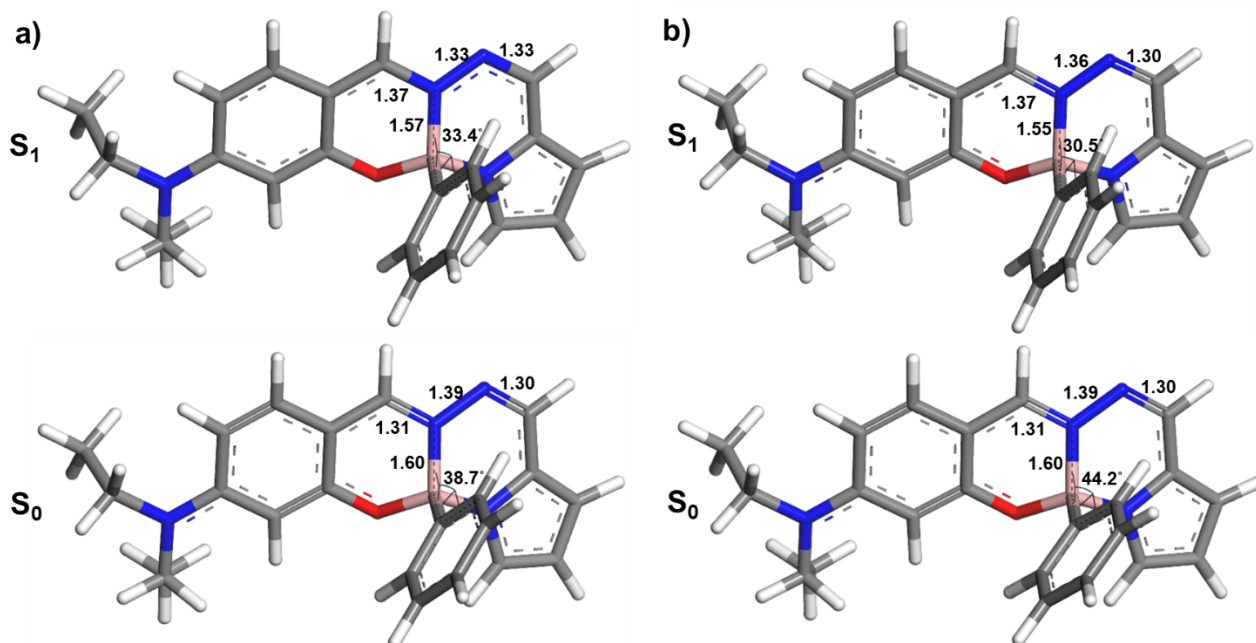

Figure S 54. Dihedral angles for B-Ph group and bond distances for the ground state and first excited of **1a** in a) DMSO and b) without solvent.

## 8. X-ray Diffraction Data

For the crystal structure determination, single-crystal of the molecule **1a** was used for data collection on a four-circle Rigaku R-AXIS RAPID-S diffractometer (equipped with a two-dimensional area IP detector). Graphite-monochromated Mo-K $\alpha$  radiation ( $\lambda = 0.71073 \text{ \AA}$ ) and oscillation scans technique with  $\Delta w = 5^\circ$  for one image were used for data collection. The lattice parameters were determined by the least-squares methods on the basis of all reflections with  $F^2 > 2\sigma(F^2)$ . Integration of the intensities, correction for Lorentz and polarization effects and cell refinement was performed using CrystalClear (Rigaku/MSC Inc., 2005) software.<sup>vi</sup> The structures were solved by direct methods using SHELXS-2013,<sup>vii</sup> which allowed location of most of the heaviest atoms, with the remaining non-hydrogen atoms being located from difference Fourier maps calculated from successive full-matrix least squares refinement cycles on  $F^2$  using SHELXL-2013.<sup>iv</sup> All non-hydrogen atoms were refined using anisotropic displacement parameters. The hydrogen atoms were assigned with common isotropic displacement factors and included in the final refinement by using geometrical restraints. The final difference Fourier maps showed no peaks of chemical significance. Crystal data for **1a**: C<sub>22</sub>H<sub>23</sub>ON<sub>4</sub>B, crystal system, space group: triclinic,  $P-1$ ; (no:2); unit cell dimensions:  $a = 11.2219(4)$ ,  $b = 13.1963(6)$ ,  $c = 15.947(2) \text{ \AA}$ ,  $\alpha = 72.800(5)$   $\beta = 70.920(4)$ ,  $\gamma = 65.017(5)^\circ$ ; volume;  $1988.4(5) \text{ \AA}^3$ ; calculated density:  $1.237 \text{ g/cm}^3$ ; absorption coefficient:  $0.077 \text{ mm}^{-1}$ ;  $F(000)$ : 784;  $\theta$ -range for data collection  $2.4\text{--}28.6^\circ$ ; refinement method: full matrix least-square on  $F^2$ ; data/parameters: 5163/506; goodness-of-fit on

$F^2$ : 1.015; Data completeness; 0.99, final  $R$ -indices [ $I > 2\sigma(I)$ ]:  $R_1 = 0.089$ ,  $wR_2 = 0.183$ ; largest diff. peak and hole: 0.793 and  $-0.734 \text{ e}\text{\AA}^{-3}$ .

CCDC-2344453 (**1a**) number contains the supplementary crystallographic data for the structures. These data are provided free of charge via the joint CCDC/FIZ Karlsruhe deposition service [www.ccdc.cam.ac.uk/structures](http://www.ccdc.cam.ac.uk/structures)

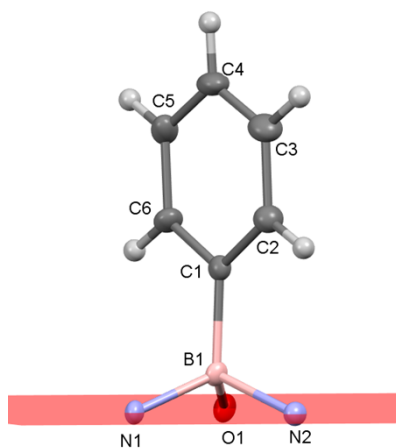

(a)

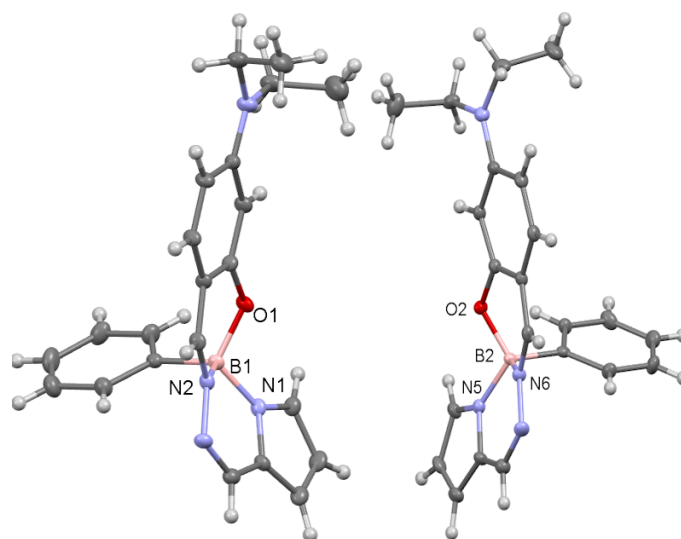

(b)

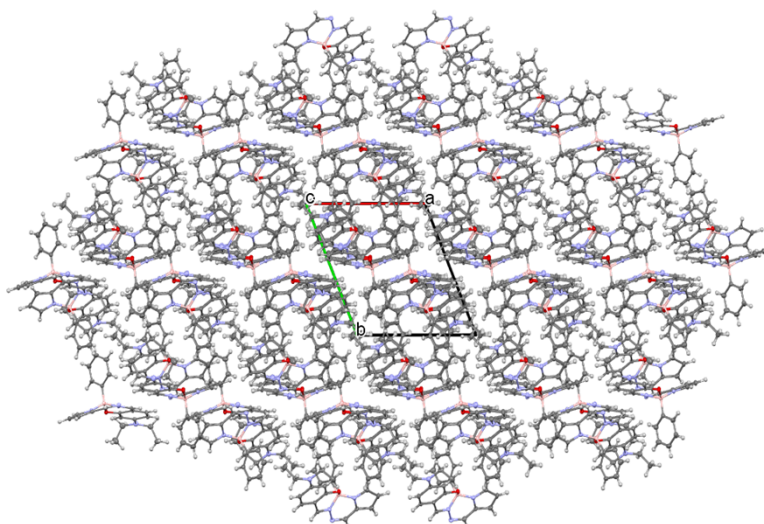

(c)

Figure S 55. (a) Boron coordination geometry with the O1/N1/N2 plane. (b) Depicting the mirror image of the enantiomers. (c) Stacking motif of the molecules viewed down along the *c*-axis.

## 9. Optimized coordinates for the ground state geometries

Gaussian16 Rev C.01<sup>viii</sup>  
 Method: B3LYP/6-311+g(d)  
 Solvent: DMSO, Solvation Method: IEFPCM  
 Dispersion correction: Grimme D3<sup>ix</sup>

**1a**

|   |             |             |             |
|---|-------------|-------------|-------------|
| C | 3.07580000  | 0.15110000  | 1.62240000  |
| C | 3.17470000  | 0.05350000  | 0.19490000  |
| C | 1.99060000  | -0.24560000 | -0.52630000 |
| C | 0.77480000  | -0.39500000 | 0.11670000  |
| C | 0.68440000  | -0.29450000 | 1.53820000  |
| C | 1.87320000  | -0.02660000 | 2.25630000  |
| C | -0.53100000 | -0.61600000 | 2.18030000  |
| N | -1.64150000 | -0.77210000 | 1.49770000  |
| B | -1.63010000 | -0.32430000 | -0.03510000 |
| O | -0.31580000 | -0.70660000 | -0.59880000 |
| N | -2.74810000 | -1.23170000 | 2.20490000  |
| C | -3.73240000 | -1.64720000 | 1.46330000  |
| C | -3.76990000 | -1.68960000 | 0.03860000  |
| N | -2.73040000 | -1.15980000 | -0.70240000 |
| H | 3.95120000  | 0.34840000  | 2.22280000  |
| N | 4.36190000  | 0.25510000  | -0.44490000 |
| H | 1.98980000  | -0.35370000 | -1.60090000 |
| H | 1.82900000  | 0.03430000  | 3.33940000  |
| H | -0.57580000 | -0.78340000 | 3.25270000  |
| H | -4.59560000 | -2.01180000 | 2.01170000  |
| C | -3.01780000 | -1.32550000 | -2.01840000 |
| C | -4.23900000 | -1.98750000 | -2.14520000 |
| C | -4.72260000 | -2.21340000 | -0.84170000 |
| H | -2.34610000 | -0.96070000 | -2.78130000 |
| H | -4.71220000 | -2.26980000 | -3.07460000 |



|   |             |             |             |
|---|-------------|-------------|-------------|
| H | -5.64000000 | -2.70870000 | -0.55600000 |
| C | -1.89510000 | 1.26770000  | -0.15330000 |
| C | -1.24240000 | 2.03100000  | -1.13320000 |
| C | -1.49380000 | 3.39630000  | -1.28540000 |
| C | -2.41210000 | 4.03420000  | -0.45050000 |
| C | -3.07180000 | 3.29620000  | 0.53450000  |
| C | -2.81250000 | 1.93230000  | 0.67640000  |
| H | -0.51970000 | 1.54930000  | -1.78540000 |
| H | -0.97150000 | 3.96280000  | -2.05110000 |
| H | -2.60940000 | 5.09580000  | -0.56300000 |
| H | -3.78480000 | 3.78480000  | 1.19230000  |
| H | -3.33260000 | 1.37980000  | 1.45470000  |
| C | 5.59430000  | 0.55300000  | 0.29830000  |
| C | 6.28980000  | -0.68230000 | 0.87750000  |
| C | 4.48580000  | 0.05650000  | -1.89570000 |
| C | 4.56930000  | -1.41260000 | -2.32100000 |
| H | 5.37090000  | 1.27400000  | 1.08680000  |
| H | 6.26700000  | 1.06650000  | -0.38970000 |
| H | 7.16710000  | -0.37940000 | 1.45580000  |
| H | 6.62390000  | -1.35520000 | 0.08540000  |
| H | 5.62460000  | -1.24250000 | 1.53830000  |
| H | 5.38490000  | 0.58350000  | -2.21590000 |
| H | 3.65320000  | 0.55550000  | -2.39760000 |
| H | 4.60700000  | -1.48260000 | -3.41150000 |
| H | 3.70350000  | -1.98110000 | -1.97530000 |
| H | 5.46660000  | -1.88770000 | -1.92000000 |

#### 1b

|   |             |             |             |
|---|-------------|-------------|-------------|
| C | 3.47138400  | 0.28208200  | 1.62254800  |
| C | 3.51715600  | -0.03393700 | 0.22516500  |
| C | 2.29163000  | -0.34121900 | -0.41776100 |
| C | 1.08844500  | -0.29509900 | 0.26598500  |
| C | 1.05154500  | 0.02252900  | 1.65517500  |
| C | 2.27844700  | 0.29832100  | 2.30028600  |
| C | -0.16729900 | -0.10216200 | 2.36040100  |
| N | -1.30644000 | -0.27261500 | 1.73356800  |
| B | -1.31831500 | -0.06664800 | 0.14409200  |
| O | -0.04432700 | -0.61581500 | -0.37495500 |
| N | -2.41818800 | -0.53367000 | 2.52825400  |
| C | -3.45214800 | -0.99060500 | 1.87631100  |
| C | -3.54598800 | -1.24170400 | 0.48395600  |
| N | -2.49439100 | -0.91046000 | -0.36349700 |
| H | 4.37761400  | 0.49667400  | 2.16889900  |
| N | 4.69653800  | -0.02355400 | -0.46275500 |
| H | 2.24730300  | -0.60703900 | -1.46377600 |
| H | 2.27400100  | 0.52258200  | 3.36259500  |
| H | -0.19117000 | -0.10446000 | 3.44660700  |
| H | -4.31661600 | -1.20116600 | 2.49830200  |
| C | -2.85737900 | -1.21551300 | -1.63855100 |
| C | -4.13816400 | -1.77651200 | -1.61318900 |
| C | -4.58827000 | -1.79250300 | -0.27901900 |
| H | -4.68055400 | -2.13103500 | -2.47949400 |
| C | -1.49313200 | 1.50500200  | -0.20336300 |
| C | -0.64567800 | 2.16131800  | -1.10796300 |
| C | -0.82352500 | 3.50852200  | -1.43392600 |
| C | -1.86369700 | 4.23539000  | -0.85551700 |
| C | -2.72182200 | 3.60396700  | 0.04854300  |
| C | -2.53427500 | 2.25871600  | 0.36497400  |
| H | 0.16858100  | 1.61068900  | -1.56856300 |
| H | -0.15035200 | 3.98973000  | -2.13763600 |
| H | -2.00574100 | 5.28252100  | -1.10472000 |
| H | -3.53497900 | 4.16133000  | 0.50451900  |
| H | -3.21384500 | 1.78817100  | 1.07063600  |
| C | 5.97204400  | 0.26637300  | 0.20592100  |
| C | 6.57319300  | -0.92717100 | 0.95411700  |
| C | 4.75623800  | -0.43417100 | -1.87180000 |

|   |             |             |             |
|---|-------------|-------------|-------------|
| C | 4.72362800  | -1.95074300 | -2.08490000 |
| H | 5.83847300  | 1.11465300  | 0.88035600  |
| H | 6.66674700  | 0.60694400  | -0.56291000 |
| H | 7.49127100  | -0.62368600 | 1.46497300  |
| H | 6.82164900  | -1.73898000 | 0.26760000  |
| H | 5.88172200  | -1.31896100 | 1.70331400  |
| H | 5.67739100  | -0.02426000 | -2.28716700 |
| H | 3.94261500  | 0.04770000  | -2.41942500 |
| H | 4.71508300  | -2.17663900 | -3.15482200 |
| H | 3.83466700  | -2.39986900 | -1.63713300 |
| H | 5.60106100  | -2.42888900 | -1.64524200 |
| C | -5.89137000 | -2.33388500 | 0.22604400  |
| H | -6.67612300 | -2.22387900 | -0.52632200 |
| H | -5.81868500 | -3.40108800 | 0.46271700  |
| H | -6.22651600 | -1.82445500 | 1.13275100  |
| C | -1.97997400 | -0.93846500 | -2.81426200 |
| H | -1.74203600 | 0.12742300  | -2.88761800 |
| H | -1.02782800 | -1.46900800 | -2.73694100 |
| H | -2.47612000 | -1.24434700 | -3.73634700 |

**1c**

|   |             |             |             |
|---|-------------|-------------|-------------|
| C | -4.00196300 | 0.79086500  | -1.21768600 |
| C | -3.87576300 | -0.16574900 | -0.15793900 |
| C | -2.56740300 | -0.56935200 | 0.20836200  |
| C | -1.44885700 | -0.02854500 | -0.40358700 |
| C | -1.58323700 | 0.92285400  | -1.45628500 |
| C | -2.88983400 | 1.30072400  | -1.83956100 |
| C | -0.43304600 | 1.32712300  | -2.17270900 |
| N | 0.77369800  | 1.03627600  | -1.75094600 |
| B | 0.92363300  | 0.44556200  | -0.26823500 |
| O | -0.23131700 | -0.45460800 | -0.04046000 |
| N | 1.82286400  | 1.35013200  | -2.60863100 |
| C | 2.95825500  | 0.78214400  | -2.30252100 |
| C | 3.21445200  | -0.09675900 | -1.22073700 |
| N | 2.22286400  | -0.36706300 | -0.28692800 |
| H | -4.97545600 | 1.11160900  | -1.55753100 |
| N | -4.97581100 | -0.65843700 | 0.48431200  |
| H | -2.39244700 | -1.29795900 | 0.98643200  |
| H | -3.01392300 | 2.00858900  | -2.65350600 |
| H | -0.51654300 | 1.85346500  | -3.11950200 |
| H | 3.77272300  | 1.02440700  | -2.97776000 |
| C | 2.74229700  | -1.19263300 | 0.66364600  |
| C | 4.07408400  | -1.48936000 | 0.33477300  |
| C | 4.37814400  | -0.79349400 | -0.85673900 |
| C | 0.97138900  | 1.66145200  | 0.80078700  |
| C | 0.12596300  | 1.70217400  | 1.91920900  |
| C | 0.19618700  | 2.73831700  | 2.85433200  |
| C | 1.12320300  | 3.76691800  | 2.68868600  |
| C | 1.97786000  | 3.74837200  | 1.58332000  |
| C | 1.89857100  | 2.70811700  | 0.65795600  |
| H | -0.60032800 | 0.90891600  | 2.06607600  |
| H | -0.47247500 | 2.74253700  | 3.71040200  |
| H | 1.18118900  | 4.57462400  | 3.41190200  |
| H | 2.70432200  | 4.54408700  | 1.44579500  |
| H | 2.57410900  | 2.71310300  | -0.19339100 |
| C | -6.33379800 | -0.24705400 | 0.10530400  |
| C | -6.90060700 | -0.99500400 | -1.10491600 |
| C | -4.85273800 | -1.71951700 | 1.49249400  |
| C | -4.62300600 | -3.11685900 | 0.90810700  |
| H | -6.34509200 | 0.83058900  | -0.06929000 |
| H | -6.97356400 | -0.41196400 | 0.97341300  |
| H | -7.88942800 | -0.60220100 | -1.35772500 |
| H | -7.00480700 | -2.06164900 | -0.89619200 |
| H | -6.25699900 | -0.88381300 | -1.98041000 |
| H | -5.77209200 | -1.71379800 | 2.07868700  |

|   |             |             |             |
|---|-------------|-------------|-------------|
| H | -4.05277800 | -1.45970000 | 2.19049400  |
| H | -4.49091200 | -3.84143000 | 1.71643600  |
| H | -3.73187600 | -3.14752500 | 0.27783600  |
| H | -5.47454900 | -3.43549300 | 0.30376100  |
| C | 5.68442300  | -0.82112200 | -1.59028900 |
| H | 6.51298800  | -0.53004600 | -0.93679100 |
| H | 5.91429500  | -1.82508600 | -1.96213000 |
| H | 5.69134000  | -0.14604100 | -2.44791900 |
| C | 1.94055000  | -1.65137100 | 1.83720800  |
| H | 1.50879200  | -0.80399900 | 2.37790600  |
| H | 1.10590700  | -2.28545400 | 1.52620200  |
| H | 2.56007300  | -2.22055300 | 2.53078700  |
| C | 4.98964100  | -2.42323500 | 1.07524100  |
| H | 6.02834900  | -2.11406700 | 0.91823000  |
| H | 4.81658200  | -2.34578800 | 2.15388600  |
| C | 4.82913600  | -3.89053900 | 0.64252600  |
| H | 5.51676000  | -4.54385400 | 1.18857700  |
| H | 3.80995800  | -4.24199300 | 0.82813800  |
| H | 5.02953200  | -4.00763400 | -0.42650300 |

**1d**

|   |             |             |             |
|---|-------------|-------------|-------------|
| C | -3.21617700 | -0.33046800 | -1.65919100 |
| C | -3.37950800 | -0.07607500 | -0.25773900 |
| C | -2.21900500 | -0.11795100 | 0.55622000  |
| C | -0.96737200 | -0.35135200 | 0.01387000  |
| C | -0.81312900 | -0.60068700 | -1.38244700 |
| C | -1.97631100 | -0.58914700 | -2.18578300 |
| C | 0.44890300  | -0.99469600 | -1.88141300 |
| N | 1.52923900  | -0.91286100 | -1.14245600 |
| B | 1.42626200  | -0.11500700 | 0.23285000  |
| O | 0.10073900  | -0.40972600 | 0.82276800  |
| N | 2.69317000  | -1.44786300 | -1.68390800 |
| C | 3.67479700  | -1.63827200 | -0.84688800 |
| C | 3.62026800  | -1.35387500 | 0.56133900  |
| N | 2.52077000  | -0.72363500 | 1.11415400  |
| H | -4.06940000 | -0.33822700 | -2.32079600 |
| N | -4.60497100 | 0.21055800  | 0.26938800  |
| H | -2.26543700 | 0.04316600  | 1.62322400  |
| H | -1.88246800 | -0.79628400 | -3.24737500 |
| H | 0.55579400  | -1.41288200 | -2.87838500 |
| C | 2.73516800  | -0.57317600 | 2.44615400  |
| C | 3.97007000  | -1.12606100 | 2.77896600  |
| C | 4.53689200  | -1.61558600 | 1.58476700  |
| H | 2.00448900  | -0.08077400 | 3.07060100  |
| H | 4.39964800  | -1.16869500 | 3.76956600  |
| H | 5.48853400  | -2.11430300 | 1.47151900  |
| C | 1.63659300  | 1.46945200  | -0.02344100 |
| C | 0.83604000  | 2.42101800  | 0.62578900  |
| C | 1.03705500  | 3.79192300  | 0.44699400  |
| C | 2.05307000  | 4.24449300  | -0.39507000 |
| C | 2.86221900  | 3.31612800  | -1.05430700 |
| C | 2.65207600  | 1.94967900  | -0.86706400 |
| H | 0.03848100  | 2.08419700  | 1.28133200  |
| H | 0.39991600  | 4.50569400  | 0.96130500  |
| H | 2.21222500  | 5.30877100  | -0.53905100 |
| H | 3.65393900  | 3.65860500  | -1.71435400 |
| H | 3.29083600  | 1.24609600  | -1.39466000 |
| C | -5.81425900 | 0.22848200  | -0.56510200 |
| C | -6.40672400 | -1.15694000 | -0.83879200 |
| C | -4.78669300 | 0.38461000  | 1.71690200  |
| C | -4.83073600 | -0.92804200 | 2.50518500  |
| H | -5.59551300 | 0.74507100  | -1.50176600 |
| H | -6.54940100 | 0.84842000  | -0.05048800 |
| H | -7.27168000 | -1.06845100 | -1.50203600 |
| H | -6.73778000 | -1.63405200 | 0.08576300  |

|   |             |             |             |
|---|-------------|-------------|-------------|
| H | -5.67872200 | -1.81610100 | -1.31680100 |
| H | -5.71952100 | 0.93082300  | 1.85982500  |
| H | -3.99807600 | 1.03657800  | 2.10043200  |
| H | -4.91303700 | -0.71726000 | 3.57500900  |
| H | -3.92870500 | -1.52252500 | 2.34595400  |
| H | -5.69030700 | -1.53419800 | 2.21270600  |
| C | 4.93907500  | -2.21286800 | -1.42110800 |
| H | 5.77439300  | -1.52033900 | -1.28433100 |
| H | 5.20637400  | -3.14491400 | -0.91574000 |
| H | 4.81686800  | -2.41249600 | -2.48513600 |

**1e**

|   |             |             |             |
|---|-------------|-------------|-------------|
| C | 4.56518500  | -0.74099800 | 0.20310600  |
| C | 4.27344800  | -0.57708200 | -1.16093800 |
| C | 2.96311900  | -0.56809600 | -1.62260400 |
| C | 1.90613500  | -0.70025500 | -0.71689400 |
| C | 2.19015600  | -0.88964400 | 0.66214800  |
| C | 3.52887800  | -0.91134000 | 1.10362300  |
| C | 1.10965900  | -1.19957600 | 1.54819700  |
| N | -0.12920900 | -1.05941300 | 1.17582800  |
| B | -0.41605900 | -0.29590700 | -0.21369700 |
| O | 0.64260400  | -0.70641500 | -1.15712300 |
| N | -1.09990500 | -1.51735300 | 2.06392000  |
| C | -2.28657400 | -1.65244400 | 1.54263300  |
| C | -2.66831400 | -1.39497100 | 0.19864000  |
| N | -1.76426900 | -0.84629000 | -0.69258700 |
| H | 5.59385500  | -0.74611700 | 0.54380300  |
| H | 2.73628100  | -0.44233200 | -2.67504800 |
| H | 3.73442400  | -1.06653100 | 2.15783300  |
| H | 1.29504500  | -1.60994300 | 2.53651100  |
| H | -3.04279700 | -2.01901200 | 2.23004900  |
| C | -2.38495000 | -0.69690300 | -1.88814200 |
| C | -3.69492600 | -1.17097300 | -1.79368600 |
| C | -3.88037200 | -1.60702300 | -0.46995700 |
| H | -1.86775300 | -0.25959000 | -2.72927200 |
| H | -4.41789500 | -1.19416800 | -2.59601600 |
| H | -4.77085300 | -2.04043600 | -0.03726300 |
| C | -0.43652200 | 1.29913100  | 0.03517500  |
| C | 0.15852400  | 2.17642900  | -0.88375700 |
| C | 0.10858400  | 3.56130900  | -0.70972800 |
| C | -0.54339500 | 4.10238000  | 0.39847300  |
| C | -1.14182900 | 3.24869600  | 1.32773200  |
| C | -1.08633900 | 1.86706600  | 1.14330800  |
| H | 0.67228200  | 1.77049100  | -1.75003000 |
| H | 0.58010700  | 4.21676500  | -1.43606400 |
| H | -0.58314200 | 5.17807000  | 0.53931500  |
| H | -1.64891900 | 3.66053500  | 2.19528900  |
| H | -1.55500800 | 1.22331900  | 1.88290200  |
| H | 5.08471200  | -0.45305600 | -1.87063700 |

**1f**

|   |             |             |             |
|---|-------------|-------------|-------------|
| C | -3.30720700 | 0.32205200  | -1.63273100 |
| C | -3.41881100 | 0.27632400  | -0.20373700 |
| C | -2.31433200 | -0.23464700 | 0.52468400  |
| C | -1.15279500 | -0.63200500 | -0.11355900 |
| C | -1.04867900 | -0.58035600 | -1.53661600 |
| C | -2.16435900 | -0.10071300 | -2.26134100 |
| C | 0.08072700  | -1.14251500 | -2.17093400 |
| N | 1.14222300  | -1.49505900 | -1.48414400 |
| B | 1.22117700  | -1.02195600 | 0.04111700  |
| O | -0.14193300 | -1.13531500 | 0.60968700  |
| N | 2.14010500  | -2.16870500 | -2.18143800 |
| C | 3.02764900  | -2.75187900 | -1.43046400 |
| C | 3.05692500  | -2.77736000 | -0.00521600 |
| N | 2.13849400  | -2.04674400 | 0.72459200  |
| H | -4.12837600 | 0.67525100  | -2.23818400 |

|   |             |             |             |
|---|-------------|-------------|-------------|
| N | -4.54091400 | 0.72229800  | 0.43038200  |
| H | -2.33169300 | -0.31896300 | 1.60134800  |
| H | -2.11232100 | -0.07212200 | -3.34533200 |
| H | 0.08983600  | -1.33573700 | -3.24002900 |
| H | 3.80542900  | -3.28335400 | -1.97047800 |
| C | 2.38897200  | -2.24446500 | 2.04343500  |
| C | 3.46105600  | -3.12615700 | 2.18383800  |
| C | 3.89233500  | -3.46031200 | 0.88539100  |
| H | 1.79995200  | -1.74584600 | 2.79893900  |
| H | 3.87137800  | -3.47966300 | 3.11882400  |
| H | 4.69762000  | -4.12652400 | 0.60964000  |
| C | 1.78298500  | 0.48924000  | 0.12597600  |
| C | 1.28057600  | 1.39715400  | 1.07383100  |
| C | 1.78101200  | 2.68869000  | 1.19690700  |
| C | 2.81667300  | 3.12148100  | 0.36027500  |
| C | 3.33771000  | 2.24462500  | -0.59618100 |
| C | 2.81621200  | 0.95117200  | -0.69724900 |
| H | 0.47216200  | 1.08762500  | 1.72967800  |
| H | 1.37955200  | 3.37922200  | 1.93196800  |
| H | 4.13535300  | 2.55017500  | -1.26176000 |
| H | 3.23659600  | 0.29442800  | -1.45447600 |
| C | -5.69557000 | 1.23457800  | -0.32074000 |
| C | -6.61569300 | 0.14346400  | -0.87560100 |
| C | -4.69306700 | 0.59164700  | 1.88607500  |
| C | -5.07077900 | -0.81774400 | 2.35202200  |
| H | -5.34102000 | 1.88381900  | -1.12371600 |
| H | -6.25650200 | 1.88060100  | 0.35571300  |
| H | -7.42214600 | 0.59687100  | -1.45860300 |
| H | -7.06773900 | -0.43867400 | -0.07015500 |
| H | -6.07262600 | -0.54554100 | -1.52619800 |
| H | -5.46355000 | 1.29940700  | 2.19294800  |
| H | -3.77286300 | 0.92338200  | 2.37298900  |
| H | -5.11318100 | -0.84955200 | 3.44421500  |
| H | -4.34119500 | -1.55935900 | 2.02016300  |
| H | -6.04923200 | -1.11099600 | 1.96682100  |
| O | 3.24397500  | 4.40840200  | 0.55059700  |
| C | 4.29456100  | 4.90511500  | -0.27692700 |
| H | 4.00556300  | 4.90034400  | -1.33243800 |
| H | 4.46849400  | 5.93003900  | 0.04486800  |
| H | 5.21232900  | 4.32338000  | -0.14718200 |

### 1g

|   |             |             |             |
|---|-------------|-------------|-------------|
| C | -3.39360800 | 0.24960200  | -1.64665100 |
| C | -3.48183600 | 0.31869300  | -0.21638900 |
| C | -2.39417500 | -0.19871000 | 0.53405300  |
| C | -1.27162200 | -0.71066900 | -0.08889300 |
| C | -1.18943500 | -0.77361900 | -1.51297000 |
| C | -2.28941000 | -0.28510700 | -2.25715000 |
| C | -0.10575600 | -1.44462700 | -2.11735300 |
| N | 0.94645200  | -1.80774500 | -1.41861500 |
| B | 1.07342300  | -1.23792200 | 0.06084400  |
| O | -0.27551500 | -1.21518400 | 0.65778900  |
| N | 1.89390700  | -2.58770900 | -2.07490500 |
| C | 2.76673300  | -3.15489100 | -1.29519600 |
| C | 2.82683900  | -3.06623000 | 0.12680000  |
| N | 1.95910100  | -2.23446900 | 0.81042000  |
| H | -4.20438900 | 0.60303800  | -2.26576000 |
| N | -4.56433600 | 0.87359800  | 0.39693900  |
| H | -2.39639800 | -0.20041100 | 1.61402500  |
| H | -2.25564100 | -0.34177600 | -3.34061000 |
| H | -0.12344500 | -1.71524500 | -3.16920600 |
| H | 3.50420100  | -3.76770500 | -1.80436100 |
| C | 2.22999800  | -2.33312800 | 2.13795200  |
| C | 3.26196900  | -3.25011500 | 2.33042300  |
| C | 3.64778300  | -3.71177300 | 1.05628800  |

|   |             |             |             |
|---|-------------|-------------|-------------|
| H | 1.68044500  | -1.74755500 | 2.85994700  |
| H | 3.67658500  | -3.54457300 | 3.28365400  |
| H | 4.41446900  | -4.43706200 | 0.82324800  |
| C | 1.73079200  | 0.24829600  | 0.02546500  |
| C | 1.30828800  | 1.23473800  | 0.93100200  |
| C | 1.88412900  | 2.49960000  | 0.95809500  |
| C | 2.90757400  | 2.78425200  | 0.05498900  |
| C | 3.35731300  | 1.83652400  | -0.86485600 |
| C | 2.76287300  | 0.58091300  | -0.86808800 |
| H | 0.50682300  | 1.01045000  | 1.62651300  |
| H | 1.55055600  | 3.25446600  | 1.65762400  |
| H | 4.15025900  | 2.08491700  | -1.55756800 |
| H | 3.11044000  | -0.15098400 | -1.59011700 |
| C | -5.70121500 | 1.39624000  | -0.37497900 |
| C | -6.69220000 | 0.32251700  | -0.83278700 |
| C | -4.69888600 | 0.85901500  | 1.86078300  |
| C | -5.14403800 | -0.48979100 | 2.43370100  |
| H | -5.32392600 | 1.96175400  | -1.22909700 |
| H | -6.21110900 | 2.12270900  | 0.25869300  |
| H | -7.48125100 | 0.77787300  | -1.43756300 |
| H | -7.16275200 | -0.16981000 | 0.02046600  |
| H | -6.20157800 | -0.44410300 | -1.43652100 |
| H | -5.42499300 | 1.62856200  | 2.12354900  |
| H | -3.75434800 | 1.17490100  | 2.31002700  |
| H | -5.17140100 | -0.43875100 | 3.52557400  |
| H | -4.46040500 | -1.29249700 | 2.14963100  |
| H | -6.14245000 | -0.75671900 | 2.08220300  |
| N | 3.52339700  | 4.11391600  | 0.06927800  |
| O | 4.42330200  | 4.35137500  | -0.73563800 |
| O | 3.11607300  | 4.93938700  | 0.88587100  |

### 1h

|   |             |             |             |
|---|-------------|-------------|-------------|
| C | -3.04361300 | -0.63763800 | -1.35419700 |
| C | -3.16252400 | 0.00586100  | -0.08208300 |
| C | -1.98585600 | 0.11075100  | 0.69579000  |
| C | -0.76696100 | -0.36094700 | 0.23674800  |
| C | -0.65281000 | -1.03549200 | -1.01817600 |
| C | -1.84026400 | -1.13818300 | -1.78408100 |
| C | 0.57893100  | -1.67547000 | -1.37709800 |
| N | 1.66803500  | -1.37691700 | -0.68149300 |
| B | 1.60470800  | -0.14567500 | 0.32539600  |
| O | 0.30832000  | -0.21925300 | 1.02524600  |
| N | 2.81953700  | -2.09731300 | -0.97999400 |
| C | 3.80062300  | -1.96300700 | -0.13713800 |
| C | 3.80688900  | -1.18005000 | 1.05218400  |
| N | 2.72431900  | -0.37810500 | 1.34937300  |
| H | -3.90362700 | -0.75264300 | -1.99721500 |
| N | -4.35264700 | 0.51878500  | 0.34755200  |
| H | -1.98298500 | 0.58527900  | 1.66629300  |
| H | -1.81449700 | -1.61738400 | -2.75446400 |
| H | 4.69163700  | -2.53387700 | -0.38185800 |
| C | 2.97406000  | 0.25859800  | 2.52138000  |
| C | 4.21835500  | -0.14318900 | 3.00875600  |
| C | 4.75338900  | -1.05163000 | 2.07459900  |
| H | 2.26265300  | 0.95847600  | 2.93396400  |
| H | 4.67252500  | 0.18660100  | 3.93209000  |
| H | 5.69980500  | -1.57104400 | 2.12764200  |
| C | 1.78265600  | 1.24715200  | -0.48202100 |
| C | 1.14948400  | 2.41632600  | -0.03303500 |
| C | 1.32626200  | 3.64003100  | -0.68159100 |
| C | 2.14956800  | 3.72142200  | -1.80593800 |
| C | 2.78767700  | 2.57109000  | -2.27350900 |
| C | 2.60209300  | 1.35329000  | -1.61655500 |
| H | 0.49807000  | 2.36580200  | 0.83502100  |
| H | 0.82006400  | 4.52817900  | -0.31425900 |

|   |             |             |             |
|---|-------------|-------------|-------------|
| H | 2.28887100  | 4.67008000  | -2.31527100 |
| H | 3.42584600  | 2.62327700  | -3.15093100 |
| H | 3.10177900  | 0.46873400  | -2.00312400 |
| C | -5.57728700 | 0.38543500  | -0.45246400 |
| C | -6.26171900 | -0.97904400 | -0.32826400 |
| C | -4.48487800 | 1.10270500  | 1.68862600  |
| C | -4.59158500 | 0.06953100  | 2.81446400  |
| H | -5.34885800 | 0.60619100  | -1.49727700 |
| H | -6.26018400 | 1.17119100  | -0.12697100 |
| H | -7.13344400 | -1.02117600 | -0.98727200 |
| H | -6.60229100 | -1.15832200 | 0.69354200  |
| H | -5.58657300 | -1.79131000 | -0.60642500 |
| H | -5.37636600 | 1.73061400  | 1.67945500  |
| H | -3.64595100 | 1.77960000  | 1.86829800  |
| H | -4.63239900 | 0.57601600  | 3.78278400  |
| H | -3.73317500 | -0.60541500 | 2.82159500  |
| H | -5.49499200 | -0.53459200 | 2.71029400  |
| C | 0.67161300  | -2.70349200 | -2.46403700 |
| H | 1.45804800  | -2.43559900 | -3.17212100 |
| H | 0.95253100  | -3.66933300 | -2.03795700 |
| H | -0.26591600 | -2.82638400 | -2.99700200 |

## References

- <sup>i</sup> F. M. F. Santos, J. N. Rosa, *et. al.*, *Chem. —Eur. J.*, 2016, **22**, 1631.
- <sup>ii</sup> F. M. F. Santos, Z. Domínguez, *et. al.*, *Chem. —Eur. J.*, 2020, **26**, 14064 – 14069.
- <sup>iii</sup> (a) P.J. Stephens, F.J. Devlin, C.F. Chabalowski, M.J. Frisch, *J. Phys. Chem.*, 1994, **98**, 11623-11627 (b) S. Grimme, S. Ehrlich, and L. Goerigk, *J. Comput. Chem.*, 2011, **32**, 1456.
- <sup>iv</sup> J.-D. Chai and M. Head-Gordon, *Phys. Chem. Chem. Phys.*, 2008, **10**, 6615-6620.
- <sup>v</sup> Y. Zhao, D.G. Truhlar, *Theor Chem Acc.*, 2008, **120** (1–3), 215–241.
- <sup>vi</sup> Rigaku/MSK, Inc., 9009 new Trails Drive, The Woodlands, TX 77381.
- <sup>vii</sup> G.M. Sheldrick, SHELXS-97 and SHELXL-97, Program for Crystal Structure Solution and Refinement, University of Göttingen, Germany, 1997.
- <sup>viii</sup> Gaussian 16, Revision C.01, M. J. Frisch, G. W. Trucks, H. B. Schlegel, G. E. Scuseria, M. A. Robb, J. R. Cheeseman, G. Scalmani, V. Barone, G. A. Petersson, H. Nakatsuji, X. Li, M. Caricato, A. V. Marenich, J. Bloino, B. G. Janesko, R. Gomperts, B. Mennucci, H. P. Hratchian, J. V. Ortiz, A. F. Izmaylov, J. L. Sonnenberg, D. Williams-Young, F. Ding, F. Lipparini, F. Egidi, J. Goings, B. Peng, A. Petrone, T. Henderson, D. Ranasinghe, V. G. Zakrzewski, J. Gao, N. Rega, G. Zheng, W. Liang, M. Hada, M. Ehara, K. Toyota, R. Fukuda, J. Hasegawa, M. Ishida, T. Nakajima, Y. Honda, O. Kitao, H. Nakai, T. Vreven, K. Throssell, J. A. Montgomery, Jr., J. E. Peralta, F. Ogliaro, M. J. Bearpark, J. J. Heyd, E. N. Brothers, K. N. Kudin, V. N. Staroverov, T. A. Keith, R. Kobayashi, J. Normand, K. Raghavachari, A. P. Rendell, J. C. Burant, S. S. Iyengar, J. Tomasi, M. Cossi, J. M. Millam, M. Klene, C. Adamo, R. Cammi, J. W. Ochterski, R. L. Martin, K. Morokuma, O. Farkas, J. B. Foresman, and D. J. Fox, Gaussian, Inc., Wallingford CT, 2016.
- <sup>ix</sup> S. Grimme, S. Ehrlich and L. Goerigk, *J. Comput. Chem.*, 2011, **32**, 1456.
